# Supplementary material for: Construction of a 4H-pyrido[4,3,2-gh]phenanthridin-5(6H)-one skeleton via a catalyst-free radical cascade addition/cyclization using azo compounds as radical sources
Source: Royal Society of Chemistry journal article supplement (doi:10.1039/c7qo00926g), 2017-11-22
Supplement: c7qo00926g1.pdf [file c7qo00926g1.pdf]

## Electronic Supplementary Material

### Construction of 4*H*-pyrido[4,3,2-*gh*]phenanthridin-5(6*H*)-one skeleton via a catalyst-free radical cascade addition/cyclization using azo compounds as radical resources

Chen Zhang, Junxia Pi, Shu Chen, Ping Liu, and Peipei Sun\*

*School of Chemistry and Materials Science, Jiangsu Provincial Key Laboratory of Material Cycle  
Processes and Pollution Control, Jiangsu Collaborative Innovation Center of Biomedical Functional  
Materials, Nanjing Normal University, Nanjing 210023, China*

*sunpeipei@njnu.edu.cn*

#### Contents

|                                                                   |        |
|-------------------------------------------------------------------|--------|
| 1. General remarks.....                                           | S2     |
| 2. General procedure for the synthesis of products <b>3</b> ..... | S2-17  |
| 3. Reduction of the product <b>3aa</b> .....                      | S17-18 |
| 4. References.....                                                | S18    |
| 5. NMR spectra of the products <b>3</b> and <b>4aa</b> .....      | S19-55 |
| 6. Crystal structure and data of <b>3za</b> .....                 | S56-57 |

## 1. General remarks

$^1\text{H}$  NMR (400MHz) spectra were recorded on a Bruker Avance 400 spectrometers in  $\text{CDCl}_3$  [using  $(\text{CH}_3)_4\text{Si}$  (for  $^1\text{H}$ ,  $\delta = 0.00$ ) as internal standard].  $^{13}\text{C}$  NMR (100 MHz) spectra on a Bruker Avance 400 spectrometers in  $\text{CDCl}_3$  [using  $\text{CDCl}_3$  (for  $^{13}\text{C}$ ,  $\delta = 77.00$ ) as internal standard]. The following abbreviations were used to explain the multiplicities: s = singlet, d = doublet, dd = doublet of doublet, t = triplet, dt = doublet of triplet, td = triplet of doublet, q = quartet, m = multiplet, ddd = doublet of doublet of doublet. High-resolution mass spectra were obtained with an AB Triple 5600 mass spectrometer by ESI on a TOF mass analyzer. *N*-Arylacrylamides **1** were prepared according to our previous procedures.<sup>1</sup>

## 2. General procedure for the synthesis of products **3**

*N*-Arylacrylamides **1** (0.2 mmol) and azo compounds **2** (0.4 mmol, 2.0 equiv.) were added to a 25 mL sealed tube with a Teflon lined cap, and the internal atmosphere were exchanged with argon gas *via* three repeated cycle of vacuum-refill. Then 1,4-dioxane (2 mL) was added. The mixture was heated at 60 °C under vigorous stirring for 24 h. After the reaction was completed, the reaction mixture was cooled to room temperature and extracted with EtOAc (15 × 3 mL). The combined organic layers were washed with brine (15 mL), dried over anhydrous  $\text{Na}_2\text{SO}_4$ , filtered and concentrated in *vacuo*. The residue was purified by silica gel chromatography using hexane/ethyl acetate (5:1) as eluent to afford the pure products **3**.

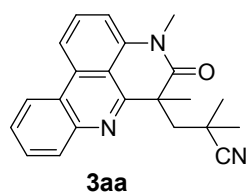

**3-(4,6-Dimethyl-5-oxo-5,6-dihydro-4H-pyrido[4,3,2-*gh*]phenanthridin-6-yl)-2,2-dimethylpropanenitrile (3aa)**. Yellow solid (55.6 mg, 81% yield); mp 200–201 °C;  $^1\text{H}$  NMR (400 MHz,  $\text{CDCl}_3$ )  $\delta$  (ppm) 8.56 (dd,  $J = 8.2, 1.1$  Hz, 1H), 8.31 (d,  $J = 8.2$  Hz, 1H), 8.15 (d,  $J = 8.0$  Hz, 1H), 7.86 (t,  $J = 8.1$  Hz, 1H), 7.78 (ddd,  $J = 8.3, 7.1, 1.3$  Hz, 1H), 7.68 (ddd,  $J = 8.3, 7.1, 1.3$  Hz, 1H), 7.30–7.26 (m, 1H), 3.64 (s, 3H), 3.02 (d,  $J = 13.7$  Hz, 1H), 2.81 (d,  $J = 13.7$  Hz, 1H), 1.78 (s, 3H), 1.32 (s, 3H), 1.06 (s, 3H);  $^{13}\text{C}$  NMR (100 MHz,  $\text{CDCl}_3$ )  $\delta$  (ppm) 173.1, 158.1, 144.5, 138.6, 133.5, 132.1, 129.6, 129.3, 126.9, 124.2, 123.0, 122.7, 116.4, 112.4, 111.1, 50.1, 49.6, 32.9, 30.8, 29.9, 29.3, 29.2; HRMS (ESI)  $m/z$ : calcd for  $\text{C}_{22}\text{H}_{22}\text{N}_3\text{O}$  [ $\text{M} + \text{H}$ ]<sup>+</sup> 344.1757, found 344.1758.

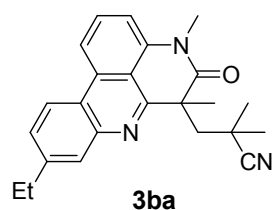

**3-(9-Ethyl-4,6-dimethyl-5-oxo-5,6-dihydro-4H-pyrido[4,3,2-gh]phenanthridin-6-yl)-2,2-dimethylpropanenitrile (3ba).** Yellow solid (46.8 mg, 63% yield); mp 125–126 °C; <sup>1</sup>H NMR (400 MHz, CDCl<sub>3</sub>) δ (ppm) 8.47 (d, *J* = 8.4 Hz, 1H), 8.28 (d, *J* = 8.2 Hz, 1H), 7.96 (s, 1H), 7.84 (t, *J* = 8.1 Hz, 1H), 7.55 (dd, *J* = 8.4, 1.6 Hz, 1H), 7.24 (d, *J* = 7.9 Hz, 1H), 3.63 (s, 3H), 3.00 (d, *J* = 13.8 Hz, 1H), 2.93 (q, *J* = 7.6 Hz, 2H), 2.81 (d, *J* = 13.7 Hz, 1H), 1.78 (s, 3H), 1.42 (t, *J* = 7.6 Hz, 3H), 1.32 (s, 3H), 1.04 (s, 3H); <sup>13</sup>C NMR (100 MHz, CDCl<sub>3</sub>) δ (ppm) 173.1, 158.0, 145.8, 144.7, 138.5, 133.5, 132.0, 127.8, 127.7, 124.3, 122.6, 120.9, 116.3, 112.1, 110.7, 50.1, 49.7, 32.9, 30.8, 29.9, 29.2, 29.2, 28.9, 15.4; HRMS (ESI) *m/z*: calcd for C<sub>24</sub>H<sub>26</sub>N<sub>3</sub>O [M + H]<sup>+</sup> 372.2070, found 372.2070.

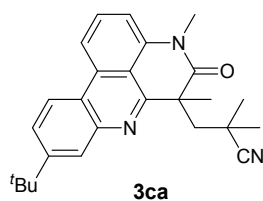

**3-(9-(*tert*-Butyl)-4,6-dimethyl-5-oxo-5,6-dihydro-4H-pyrido[4,3,2-gh]phenanthridin-6-yl)-2,2-dimethylpropanenitrile (3ca).** Yellow solid (52.7 mg, 66% yield); mp 123–124 °C; <sup>1</sup>H NMR (400 MHz, CDCl<sub>3</sub>) δ (ppm) 8.50 (d, *J* = 8.7 Hz, 1H), 8.28 (d, *J* = 8.3 Hz, 1H), 8.10 (s, 1H), 7.85 (t, *J* = 7.9 Hz, 1H), 7.77 (d, *J* = 8.6 Hz, 1H), 7.25 (d, *J* = 7.9 Hz, 1H), 3.64 (s, 3H), 3.00 (d, *J* = 13.0 Hz, 1H), 2.81 (d, *J* = 13.7 Hz, 1H), 1.78 (s, 3H), 1.51 (s, 9H), 1.34 (s, 3H), 1.02 (s, 3H); <sup>13</sup>C NMR (100 MHz, CDCl<sub>3</sub>) δ (ppm) 173.1, 158.0, 152.7, 144.6, 138.6, 133.4, 132.0, 125.4, 124.3, 122.4, 120.6, 116.3, 112.2, 110.7, 50.1, 49.7, 35.1, 32.9, 31.3, 30.9, 29.9, 29.4, 29.1; HRMS (ESI) *m/z*: calcd for C<sub>26</sub>H<sub>30</sub>N<sub>3</sub>O [M + H]<sup>+</sup> 400.2383, found 400.2381.

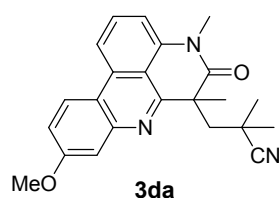

**3-(9-Methoxy-4,6-dimethyl-5-oxo-5,6-dihydro-4H-pyrido[4,3,2-gh]phenanthridin-6-yl)-2,2-dimethylpropanenitrile (3da).** Yellow solid (47.8 mg, 64% yield); mp 147–149 °C; <sup>1</sup>H NMR (400 MHz, CDCl<sub>3</sub>) δ (ppm) 8.44 (d, *J* = 9.1 Hz, 1H), 8.20 (d, *J* = 8.3 Hz, 1H), 7.82 (t, *J* = 8.0 Hz, 1H), 7.53

(d,  $J = 11.8$  Hz, 1H), 7.36–7.29 (m, 1H), 7.20 (d,  $J = 7.9$  Hz, 1H), 4.03 (s, 3H), 3.63 (s, 3H), 2.97 (d,  $J = 13.6$  Hz, 1H), 2.80 (d,  $J = 13.7$  Hz, 1H), 1.78 (s, 3H), 1.30 (s, 3H), 1.04 (s, 3H);  $^{13}\text{C}$  NMR (100 MHz,  $\text{CDCl}_3$ )  $\delta$  (ppm) 173.1, 160.6, 158.4, 146.3, 138.5, 133.6, 132.1, 124.2, 123.9, 118.2, 117.1, 116.0, 111.6, 110.0, 109.1, 55.6, 49.9, 32.9, 30.8, 29.7, 29.2, 29.0; HRMS (ESI)  $m/z$ : calcd for  $\text{C}_{23}\text{H}_{24}\text{N}_3\text{O}_2$   $[\text{M} + \text{H}]^+$  374.1863, found 374.1861.

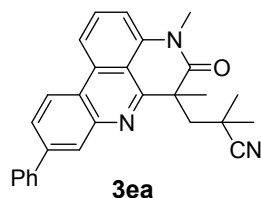

**3-(4,6-Dimethyl-5-oxo-9-phenyl-5,6-dihydro-4H-pyrido[4,3,2-gh]phenanthridin-6-yl)-2,2-dimethylpropanenitrile (3ea).** Yellow solid (58.7 mg, 70% yield); mp 261–262 °C;  $^1\text{H}$  NMR (400 MHz,  $\text{CDCl}_3$ )  $\delta$  (ppm) 8.63 (d,  $J = 8.6$  Hz, 1H), 8.39 (s, 1H), 8.33 (d,  $J = 8.3$  Hz, 1H), 7.96 (dd,  $J = 8.5$ , 1.4 Hz, 1H), 7.93–7.82 (m, 3H), 7.55 (t,  $J = 7.6$  Hz, 2H), 7.45 (t,  $J = 7.3$  Hz, 1H), 7.29 (d,  $J = 7.9$  Hz, 1H), 3.65 (s, 3H), 3.03 (d,  $J = 13.5$  Hz, 1H), 2.82 (d,  $J = 13.7$  Hz, 1H), 1.80 (s, 3H), 1.34 (s, 3H), 1.07 (s, 3H);  $^{13}\text{C}$  NMR (100 MHz,  $\text{CDCl}_3$ )  $\delta$  (ppm) 173.1, 158.6, 144.9, 142.0, 140.2, 138.7, 133.3, 132.2, 129.0, 127.9, 127.5, 126.1, 124.2, 123.3, 122.1, 116.4, 112.3, 111.1, 50.2, 49.6, 33.0, 30.8, 29.9, 29.3, 29.3; HRMS (ESI)  $m/z$ : calcd for  $\text{C}_{28}\text{H}_{26}\text{N}_3\text{O}$   $[\text{M} + \text{H}]^+$  420.2070, found 420.2070.

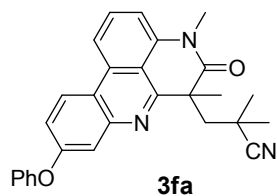

**3-(4,6-Dimethyl-5-oxo-9-phenoxy-5,6-dihydro-4H-pyrido[4,3,2-gh]phenanthridin-6-yl)-2,2-dimethylpropanenitrile (3fa).** Brown solid (56.6 mg, 65% yield); mp 156–157 °C;  $^1\text{H}$  NMR (400 MHz,  $\text{CDCl}_3$ )  $\delta$  (ppm) 9.18 (d,  $J = 1.7$  Hz, 1H), 8.59 (d,  $J = 9.1$  Hz, 1H), 8.33 (d,  $J = 8.1$  Hz, 1H), 8.20 (t,  $J = 7.8$  Hz, 1H), 7.56 (dd,  $J = 8.9$ , 1.6 Hz, 1H), 7.49 (t,  $J = 7.8$  Hz, 2H), 7.40 (d,  $J = 7.6$  Hz, 1H), 7.31 (d,  $J = 7.4$  Hz, 1H), 7.18 (d,  $J = 7.8$  Hz, 2H), 4.29 (d,  $J = 15.0$  Hz, 1H), 3.65 (s, 3H), 2.95 (d,  $J = 15.0$  Hz, 1H), 2.31 (s, 3H), 1.31 (s, 3H), 1.08 (s, 3H);  $^{13}\text{C}$  NMR (100 MHz,  $\text{CDCl}_3$ )  $\delta$  (ppm) 170.2, 161.0, 159.8, 154.6, 141.8, 139.1, 136.9, 135.6, 130.5, 125.6, 124.9, 123.5, 121.6, 120.4, 119.0, 116.4, 112.2, 110.0, 109.0, 50.4, 48.6, 32.3, 30.7, 30.5, 28.4, 28.4; HRMS (ESI)  $m/z$ : calcd for  $\text{C}_{28}\text{H}_{26}\text{N}_3\text{O}_2$   $[\text{M} + \text{H}]^+$  436.2020, found 436.2018.

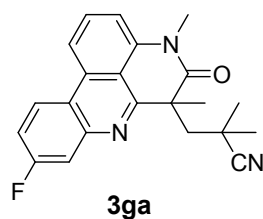

**3-(9-Fluoro-4,6-dimethyl-5-oxo-5,6-dihydro-4H-pyrido[4,3,2-gh]phenanthridin-6-yl)-2,2-dimethylpropanenitrile (3ga).** Yellow solid (52.8 mg, 73% yield); mp 170–171 °C;  $^1\text{H}$  NMR (400 MHz,  $\text{CDCl}_3$ )  $\delta$  (ppm) 8.53 (dd,  $J = 9.1, 5.9$  Hz, 1H), 8.23 (d,  $J = 8.3$  Hz, 1H), 7.86 (t,  $J = 8.1$  Hz, 1H), 7.79 (dd,  $J = 9.7, 1.9$  Hz, 1H), 7.43 (ddd,  $J = 9.0, 8.2, 2.7$  Hz, 1H), 7.29–7.25 (m, 1H), 3.63 (s, 3H), 3.00 (d,  $J = 13.7$  Hz, 1H), 2.79 (d,  $J = 13.7$  Hz, 1H), 1.77 (s, 3H), 1.31 (s, 3H), 1.09 (s, 3H);  $^{13}\text{C}$  NMR (100 MHz,  $\text{CDCl}_3$ )  $\delta$  (ppm) 173.0, 163.0 (d,  $J = 247.4$  Hz), 159.5, 145.8 (d,  $J = 12.1$  Hz), 138.7, 133.3, 132.5, 124.8 (d,  $J = 9.7$  Hz), 124.2, 119.7 (d,  $J = 1.9$  Hz), 116.2, 116.1 (d,  $J = 23.8$  Hz), 114.0 (d,  $J = 20.2$  Hz), 112.1 (d,  $J = 1.1$  Hz), 110.9, 50.2, 49.6, 32.9, 30.8, 29.9, 29.4, 29.0; HRMS (ESI)  $m/z$ : calcd for  $\text{C}_{22}\text{H}_{21}\text{FN}_3\text{O}$  [ $\text{M} + \text{H}$ ] $^+$  362.1663, found 362.1661.

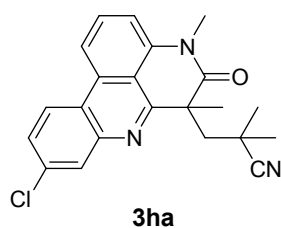

**3-(9-Chloro-4,6-dimethyl-5-oxo-5,6-dihydro-4H-pyrido[4,3,2-gh]phenanthridin-6-yl)-2,2-dimethylpropanenitrile (3ha).** Yellow solid (54.4 mg, 72% yield); mp 192–193 °C;  $^1\text{H}$  NMR (400 MHz,  $\text{CDCl}_3$ )  $\delta$  (ppm) 8.47 (d,  $J = 8.8$  Hz, 1H), 8.25 (d,  $J = 8.3$  Hz, 1H), 8.15 (s, 1H), 7.88 (t,  $J = 8.1$  Hz, 1H), 7.62 (dd,  $J = 8.8, 2.0$  Hz, 1H), 7.29 (d,  $J = 7.8$  Hz, 1H), 3.63 (s, 3H), 2.99 (d,  $J = 13.7$  Hz, 1H), 2.79 (d,  $J = 13.7$  Hz, 1H), 1.76 (s, 3H), 1.32 (s, 3H), 1.08 (s, 3H);  $^{13}\text{C}$  NMR (100 MHz,  $\text{CDCl}_3$ )  $\delta$  (ppm) 172.9, 159.6, 145.1, 138.7, 135.0, 133.1, 132.6, 128.8, 127.5, 124.2, 121.5, 116.3, 112.4, 111.4, 50.2, 49.6, 33.0, 30.8, 29.9, 29.5, 29.0; HRMS (ESI)  $m/z$ : calcd for  $\text{C}_{22}\text{H}_{21}\text{ClN}_3\text{O}$  [ $\text{M} + \text{H}$ ] $^+$  378.1368, found 378.1368.

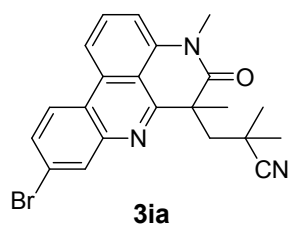

**3-(9-Bromo-4,6-dimethyl-5-oxo-5,6-dihydro-4H-pyrido[4,3,2-gh]phenanthridin-6-yl)-2,2-**

**dimethylpropanenitrile (3ia)**. Yellow solid (43.1 mg, 51% yield); mp 210–211 °C;  $^1\text{H}$  NMR (400 MHz,  $\text{CDCl}_3$ )  $\delta$  (ppm) 8.41 (d,  $J = 8.8$  Hz, 1H), 8.33 (s, 1H), 8.25 (d,  $J = 8.3$  Hz, 1H), 7.88 (t,  $J = 8.1$  Hz, 1H), 7.76 (dd,  $J = 8.8, 1.3$  Hz, 1H), 7.32–7.29 (m, 1H), 3.63 (s, 3H), 2.99 (d,  $J = 13.7$  Hz, 1H), 2.78 (d,  $J = 13.7$  Hz, 1H), 1.76 (s, 3H), 1.32 (s, 3H), 1.08 (s, 3H);  $^{13}\text{C}$  NMR (100 MHz,  $\text{CDCl}_3$ )  $\delta$  (ppm) 172.9, 159.6, 145.3, 138.8, 133.1, 132.6, 131.9, 130.1, 124.2, 124.1, 123.2, 121.9, 116.2, 112.4, 111.5, 50.2, 49.6, 32.9, 30.7, 29.9, 29.5, 29.1; HRMS (ESI)  $m/z$ : calcd for  $\text{C}_{22}\text{H}_{21}\text{BrN}_3\text{O}$  [ $\text{M} + \text{H}$ ] $^+$  422.0863, found 422.0862.

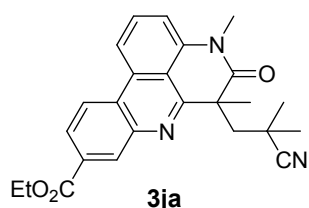

**Ethyl 6-(2-cyano-2-methylpropyl)-4,6-dimethyl-5-oxo-5,6-dihydro-4H-pyrido[4,3,2-gh]**

**phenanthridine-9-carboxylate (3ja)**. Yellow solid (61.5 mg, 74% yield); mp 198–199 °C;  $^1\text{H}$  NMR (400 MHz,  $\text{CDCl}_3$ )  $\delta$  (ppm) 8.80 (d,  $J = 1.0$  Hz, 1H), 8.53 (d,  $J = 8.6$  Hz, 1H), 8.29–8.21 (m, 2H), 7.84 (t,  $J = 8.1$  Hz, 1H), 7.31 (d,  $J = 7.9$  Hz, 1H), 4.51–4.43 (m, 2H), 3.61 (s, 3H), 3.01 (d,  $J = 13.7$  Hz, 1H), 2.78 (d,  $J = 13.7$  Hz, 1H), 1.77 (s, 3H), 1.47 (t,  $J = 7.1$  Hz, 3H), 1.31 (s, 3H), 1.07 (s, 3H);  $^{13}\text{C}$  NMR (100 MHz,  $\text{CDCl}_3$ )  $\delta$  (ppm) 172.9, 166.3, 159.2, 143.9, 138.7, 132.8, 132.5, 131.5, 131.0, 126.7, 126.2, 124.1, 123.0, 116.9, 112.9, 112.9, 61.4, 50.2, 49.7, 32.9, 30.8, 29.9, 29.5, 29.1, 14.5; HRMS (ESI)  $m/z$ : calcd for  $\text{C}_{25}\text{H}_{26}\text{N}_3\text{O}_3$  [ $\text{M} + \text{H}$ ] $^+$  416.1969, found 416.1968.

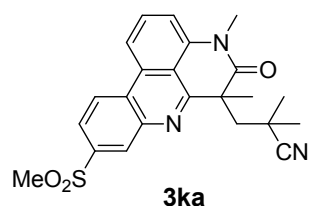

**3-(4,6-Dimethyl-9-(methylsulfonyl)-5-oxo-5,6-dihydro-4H-pyrido[4,3,2-gh]phenanthridin-6-yl)-2,2-dimethylpropanenitrile (3ka)**. Yellow solid (44.7 mg, 53% yield); mp 213–214 °C;  $^1\text{H}$  NMR (400 MHz,  $\text{CDCl}_3$ )  $\delta$  (ppm) 8.74–8.70 (m, 2H), 8.33 (d,  $J = 8.3$  Hz, 1H), 8.12 (dd,  $J = 8.6, 2.0$  Hz, 1H), 7.95 (t,  $J = 8.1$  Hz, 1H), 7.40 (d,  $J = 8.0$  Hz, 1H), 3.64 (s, 3H), 3.21 (s, 3H), 3.02 (d,  $J = 13.7$  Hz, 1H), 2.78 (d,  $J = 13.7$  Hz, 1H), 1.75 (s, 3H), 1.33 (s, 3H), 1.13 (s, 3H);  $^{13}\text{C}$  NMR (100 MHz,  $\text{CDCl}_3$ )  $\delta$  (ppm) 172.7, 160.8, 143.9, 140.6, 138.9, 133.1, 132.4, 129.7, 126.8, 124.6, 124.1, 123.7, 116.9, 113.2, 112.9, 50.4, 49.5, 44.6, 33.0, 30.7, 30.0, 29.7, 29.0; HRMS (ESI)  $m/z$ : calcd for  $\text{C}_{23}\text{H}_{24}\text{N}_3\text{O}_3\text{S}$  [ $\text{M} +$

H]<sup>+</sup> 422.1533, found 422.1533.

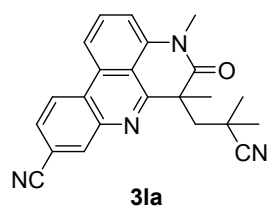

**6-(2-Cyano-2-methylpropyl)-4,6-dimethyl-5-oxo-5,6-dihydro-4H-pyrido[4,3,2-*gh*]phenanthridine-9-carbonitrile (3a).** Yellow solid (37.6 mg, 51% yield); mp 225–226 °C; <sup>1</sup>H NMR (400 MHz, CDCl<sub>3</sub>) δ (ppm) 8.60 (d, *J* = 8.5 Hz, 1H), 8.47 (d, *J* = 1.5 Hz, 1H), 8.29 (d, *J* = 8.3 Hz, 1H), 7.94 (t, *J* = 8.1 Hz, 1H), 7.81 (d, *J* = 8.5 Hz, 1H), 7.39 (d, *J* = 8.0 Hz, 1H), 3.64 (s, 3H), 3.01 (d, *J* = 13.8 Hz, 1H), 2.78 (d, *J* = 13.8 Hz, 1H), 1.76 (s, 3H), 1.31 (s, 3H), 1.14 (s, 3H); <sup>13</sup>C NMR (100 MHz, CDCl<sub>3</sub>) δ (ppm) 172.8, 160.6, 143.7, 138.9, 134.7, 133.1, 132.4, 128.2, 126.3, 124.2, 124.1, 118.6, 116.8, 113.1, 112.8, 112.5, 50.4, 49.5, 33.0, 30.7, 30.0, 29.7, 28.7; HRMS (ESI) *m/z*: calcd for C<sub>23</sub>H<sub>21</sub>N<sub>4</sub>O [M + H]<sup>+</sup> 369.1710, found 369.1709.

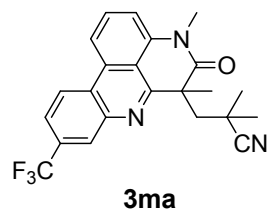

**3-(4,6-Dimethyl-5-oxo-9-(trifluoromethyl)-5,6-dihydro-4H-pyrido[4,3,2-*gh*]phenanthridin-6-yl)-2,2-dimethylpropanenitrile (3ma).** White solid (46.1 mg, 56% yield); mp 169–170 °C; <sup>1</sup>H NMR (400 MHz, CDCl<sub>3</sub>) δ (ppm) 8.65 (d, *J* = 8.6 Hz, 1H), 8.44 (s, 1H), 8.32 (d, *J* = 8.3 Hz, 1H), 7.92 (dd, *J* = 10.2, 6.0 Hz, 1H), 7.85 (dd, *J* = 8.6, 1.6 Hz, 1H), 7.36 (d, *J* = 8.0 Hz, 1H), 3.65 (s, 3H), 3.02 (d, *J* = 13.7 Hz, 1H), 2.80 (d, *J* = 13.7 Hz, 1H), 1.78 (s, 3H), 1.34 (s, 3H), 1.11 (s, 3H); <sup>13</sup>C NMR (100 MHz, CDCl<sub>3</sub>) δ (ppm) 172.9, 160.0, 143.8, 138.8, 132.8, 132.7, 131.0 (q, *J* = 32.6 Hz), 127.1 (q, *J* = 4.1 Hz), 125.3, 124.1, 124.0 (q, *J* = 274.7 Hz), 123.9, 122.6 (q, *J* = 3.3 Hz), 116.6, 113.0, 112.2, 50.3, 49.6, 32.9, 30.7, 30.0, 29.5, 29.1; HRMS (ESI) *m/z*: calcd for C<sub>23</sub>H<sub>21</sub>F<sub>3</sub>N<sub>3</sub>O [M + H]<sup>+</sup> 412.1631, found 412.1632.

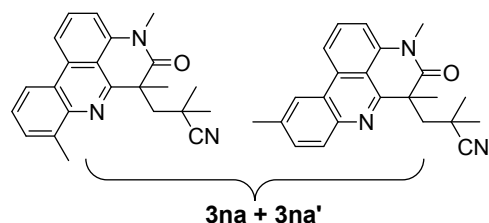

**2,2-Dimethyl-3-(4,6,8-trimethyl-5-oxo-5,6-dihydro-4H-pyrido[4,3,2-*gh*]phenanthridin-6-yl)propanenitrile (3na)** and **2,2-dimethyl-3-(4,6,10-trimethyl-5-oxo-5,6-dihydro-4H-pyrido[4,3,2-*gh*]phenanthridin-6-yl)propanenitrile (3na')**. Yellow solid (40.8 mg, 57% yield); mp 147–148 °C; <sup>1</sup>H NMR (400 MHz, CDCl<sub>3</sub>) δ (ppm) 8.41 (d, *J* = 8.1 Hz, 0.67H), 8.34 (s, 0.33H), 8.29 (d, *J* = 8.3 Hz, 1H), 8.06 (d, *J* = 8.1 Hz, 0.3H), 7.82 (t, *J* = 8.1 Hz, 1H), 7.66–7.59 (m, 1H), 7.58–7.54 (m, 0.67H), 7.25 (d, *J* = 7.9 Hz, 1H), 3.64 (d, *J* = 3.8 Hz, 3H), 3.08–2.97 (m, 1H), 2.90 (s, 2H), 2.83 (t, *J* = 13.8 Hz, 1H), 2.64 (s, 1H), 1.78 (d, *J* = 7.0 Hz, 3H), 1.32 (d, *J* = 9.2 Hz, 3H), 1.06 (d, *J* = 9.7 Hz, 3H); <sup>13</sup>C NMR (100 MHz, CDCl<sub>3</sub>) δ (ppm) 173.3, 173.2, 156.9, 156.4, 143.1, 142.9, 138.6, 138.5, 137.4, 136.8, 133.8, 133.2, 131.8, 131.1, 129.8, 129.4, 126.5, 124.2, 122.8, 122.8, 122.3, 120.6, 116.7, 116.4, 112.5, 112.2, 111.0, 110.9, 50.4, 50.0, 49.8, 49.7, 33.6, 32.9, 30.8, 30.8, 29.9, 29.9, 29.6, 29.3, 29.3, 29.1, 22.0, 18.4; HRMS (ESI) *m/z*: calcd for C<sub>23</sub>H<sub>24</sub>N<sub>3</sub>O [M + H]<sup>+</sup> 358.1914, found 358.1914.

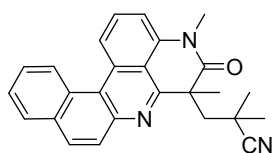

**3oa**

**3-(4,6-Dimethyl-5-oxo-5,6-dihydro-4H-benzo[*a*]pyrido[4,3,2-*gh*]phenanthridin-6-yl)-2,2-dimethylpropanenitrile (3oa)**. Yellow solid (59.0 mg, 75% yield); mp 136–137 °C; <sup>1</sup>H NMR (400 MHz, CDCl<sub>3</sub>) δ (ppm) 9.09 (d, *J* = 8.4 Hz, 1H), 8.81 (d, *J* = 8.6 Hz, 1H), 8.12–8.02 (m, 3H), 7.89 (t, *J* = 8.2 Hz, 1H), 7.77–7.66 (m, 2H), 7.30 (d, *J* = 7.9 Hz, 1H), 3.68 (s, 3H), 3.00 (d, *J* = 13.7 Hz, 1H), 2.85 (d, *J* = 13.8 Hz, 1H), 1.85 (s, 3H), 1.31 (s, 3H), 1.00 (s, 3H); <sup>13</sup>C NMR (100 MHz, CDCl<sub>3</sub>) δ (ppm) 173.0, 157.2, 144.5, 138.4, 133.5, 133.2, 131.7, 130.3, 129.9, 128.8, 128.0, 127.6, 126.7, 126.4, 124.2, 121.1, 119.6, 113.7, 110.3, 50.0, 49.8, 32.8, 30.8, 30.0, 29.2, 29.0; HRMS (ESI) *m/z*: calcd for C<sub>26</sub>H<sub>24</sub>N<sub>3</sub>O [M + H]<sup>+</sup> 394.1914, found 394.1913.

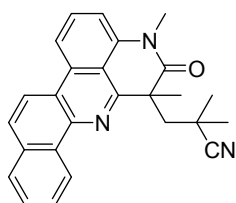

**3pa**

**3-(4,6-Dimethyl-5-oxo-5,6-dihydro-4H-benzo[*c*]pyrido[4,3,2-*gh*]phenanthridin-6-yl)-2,2-dimethylpropanenitrile (3pa)**. Brown solid (41.7 mg, 53% yield); mp 209–210 °C; <sup>1</sup>H NMR (400



MHz, CDCl<sub>3</sub>)  $\delta$  (ppm) 9.43 (d,  $J$  = 8.1 Hz, 1H), 8.54 (d,  $J$  = 9.0 Hz, 1H), 8.38 (d,  $J$  = 8.4 Hz, 1H), 8.06–8.00 (m, 2H), 7.90 (t,  $J$  = 8.1 Hz, 1H), 7.83–7.71 (m, 2H), 7.29 (t,  $J$  = 3.9 Hz, 1H), 3.67 (s, 3H), 3.14 (d,  $J$  = 13.7 Hz, 1H), 2.93 (d,  $J$  = 13.7 Hz, 1H), 1.88 (s, 3H), 1.34 (s, 3H), 0.98 (s, 3H); <sup>13</sup>C NMR (100 MHz, CDCl<sub>3</sub>)  $\delta$  (ppm) 173.2, 156.7, 141.6, 138.6, 133.7, 133.6, 132.0, 131.6, 127.7, 127.7, 127.0, 124.8, 124.1, 120.3, 119.9, 116.7, 113.1, 110.4, 50.3, 50.3, 33.5, 30.9, 29.9, 29.5, 29.3; HRMS (ESI)  $m/z$ : calcd for C<sub>26</sub>H<sub>24</sub>N<sub>3</sub>O [M + H]<sup>+</sup> 394.1914, found 394.1918.

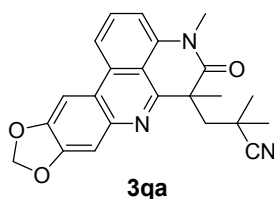

**3-(4,6-Dimethyl-5-oxo-5,6-dihydro-4H-[1,3]dioxolo[4,5-*b*]pyrido[4,3,2-*gh*]phenanthridin-6-yl)-2,2-dimethylpropanenitrile (3qa).** Brown solid (51.9 mg, 67% yield); mp 199–200 °C; <sup>1</sup>H NMR (400 MHz, CDCl<sub>3</sub>)  $\delta$  (ppm) 8.08 (d,  $J$  = 8.4 Hz, 1H), 7.85 (s, 1H), 7.79 (t,  $J$  = 8.1 Hz, 1H), 7.50 (s, 1H), 7.18 (d,  $J$  = 7.9 Hz, 1H), 6.17 (d,  $J$  = 6.5 Hz, 2H), 3.61 (s, 3H), 2.95 (d,  $J$  = 12.0 Hz, 1H), 2.77 (d,  $J$  = 13.7 Hz, 1H), 1.77 (s, 3H), 1.27 (s, 3H), 1.04 (s, 3H); <sup>13</sup>C NMR (100 MHz, CDCl<sub>3</sub>)  $\delta$  (ppm) 173.2, 155.4, 149.9, 148.2, 138.5, 133.3, 131.5, 124.7, 124.1, 119.0, 116.2, 111.8, 109.9, 107.1, 101.9, 99.7, 49.9, 49.6, 32.9, 30.8, 29.8, 29.3, 28.7; HRMS (ESI)  $m/z$ : calcd for C<sub>23</sub>H<sub>22</sub>N<sub>3</sub>O<sub>3</sub> [M + H]<sup>+</sup> 388.1656, found 388.1654.

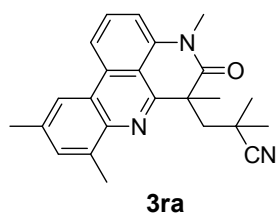

**2,2-Dimethyl-3-(4,6,8,10-tetramethyl-5-oxo-5,6-dihydro-4H-pyrido[4,3,2-*gh*]phenanthridin-6-yl)propanenitrile (3ra).** Yellow solid (52.0 mg, 70% yield); mp 149–150 °C; <sup>1</sup>H NMR (400 MHz, CDCl<sub>3</sub>)  $\delta$  (ppm) 8.30 (d,  $J$  = 8.3 Hz, 1H), 8.21 (s, 1H), 7.82 (dd,  $J$  = 10.1, 6.2 Hz, 1H), 7.49 (s, 1H), 7.25 (d,  $J$  = 7.8 Hz, 1H), 3.64 (s, 3H), 3.03 (d,  $J$  = 13.6 Hz, 1H), 2.85 (s, 3H), 2.82 (d,  $J$  = 13.7 Hz, 1H), 2.60 (s, 3H), 1.77 (s, 3H), 1.31 (s, 3H), 1.04 (s, 3H); <sup>13</sup>C NMR (100 MHz, CDCl<sub>3</sub>)  $\delta$  (ppm) 173.3, 155.2, 141.4, 138.5, 137.0, 136.3, 133.5, 131.7, 131.6, 124.2, 122.7, 120.0, 116.7, 112.2, 110.7, 50.1, 49.8, 33.6, 30.8, 29.9, 29.5, 29.2, 22.0, 18.3; HRMS (ESI)  $m/z$ : calcd for C<sub>24</sub>H<sub>26</sub>N<sub>3</sub>O [M + H]<sup>+</sup> 372.2070, found 372.2074.

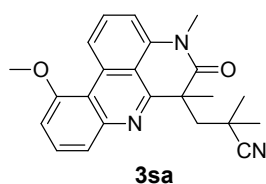

**3-(11-Methoxy-4,6-dimethyl-5-oxo-5,6-dihydro-4H-pyrido[4,3,2-*gh*]phenanthridin-6-yl)-2,2-dimethylpropanenitrile (3sa).** Yellow solid (62.0 mg, 83% yield); mp 115–116 °C; <sup>1</sup>H NMR (400 MHz, CDCl<sub>3</sub>) δ (ppm) 9.30 (d, *J* = 8.3 Hz, 1H), 7.84–7.78 (m, 2H), 7.69 (t, *J* = 8.1 Hz, 1H), 7.28 (d, *J* = 7.8 Hz, 1H), 7.15–7.11 (m, 1H), 4.12 (s, 3H), 3.63 (s, 3H), 3.00 (d, *J* = 13.7 Hz, 1H), 2.80 (d, *J* = 13.7 Hz, 1H), 1.77 (s, 3H), 1.31 (s, 3H), 1.06 (s, 3H); <sup>13</sup>C NMR (100 MHz, CDCl<sub>3</sub>) δ (ppm) 172.9, 158.4, 158.3, 146.5, 137.9, 133.4, 131.8, 128.8, 124.3, 122.5, 122.4, 114.0, 112.8, 111.0, 107.8, 55.9, 49.9, 49.5, 32.9, 30.8, 30.0, 29.3, 29.2; HRMS (ESI) *m/z*: calcd for C<sub>23</sub>H<sub>24</sub>N<sub>3</sub>O<sub>2</sub> [M + H]<sup>+</sup> 374.1863, found 374.1865.

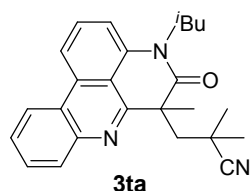

**3-(4-Isobutyl-6-methyl-5-oxo-5,6-dihydro-4H-pyrido[4,3,2-*gh*]phenanthridin-6-yl)-2,2-dimethylpropanenitrile (3ta).** Yellow solid (46.3 mg, 60% yield); mp 139–140 °C; <sup>1</sup>H NMR (400 MHz, CDCl<sub>3</sub>) δ (ppm) 8.56 (d, *J* = 7.5 Hz, 1H), 8.30 (d, *J* = 8.3 Hz, 1H), 8.14 (d, *J* = 7.9 Hz, 1H), 7.84 (t, *J* = 8.1 Hz, 1H), 7.81–7.75 (m, 1H), 7.71–7.65 (m, 1H), 7.27 (d, *J* = 8.0 Hz, 1H), 4.48 (dd, *J* = 14.1, 9.4 Hz, 1H), 3.74 (dd, *J* = 14.3, 5.4 Hz, 1H), 3.10 (d, *J* = 13.6 Hz, 1H), 2.80 (d, *J* = 13.7 Hz, 1H), 2.40–2.25 (m, 1H), 1.73 (s, 3H), 1.35 (s, 3H), 1.22 (s, 3H), 1.13 (d, *J* = 6.7 Hz, 3H), 1.04 (d, *J* = 6.6 Hz, 3H); <sup>13</sup>C NMR (100 MHz, CDCl<sub>3</sub>) δ (ppm) 173.5, 158.2, 144.4, 138.2, 133.7, 131.9, 129.6, 129.3, 126.8, 124.5, 123.1, 122.7, 116.2, 112.6, 111.6, 50.7, 49.3, 47.9, 33.6, 30.7, 29.8, 29.3, 26.6, 20.6, 20.2; HRMS (ESI) *m/z*: calcd for C<sub>25</sub>H<sub>28</sub>N<sub>3</sub>O [M + H]<sup>+</sup> 386.2227, found 386.2229.

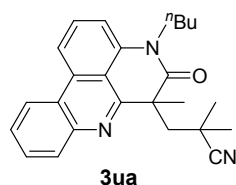

**3-(4-Butyl-6-methyl-5-oxo-5,6-dihydro-4H-pyrido[4,3,2-*gh*]phenanthridin-6-yl)-2,2-dimethylpropanenitrile (3ua).** Yellow solid (44.7 mg, 58% yield); mp 98–99 °C; <sup>1</sup>H NMR (400 MHz, CDCl<sub>3</sub>) δ (ppm) 8.56 (d, *J* = 7.7 Hz, 1H), 8.31 (d, *J* = 8.3 Hz, 1H), 8.14 (d, *J* = 4.8 Hz, 1H), 7.86 (t, *J* =

8.0 Hz, 1H), 7.78 (t,  $J = 7.4$  Hz, 1H), 7.68 (t,  $J = 7.5$  Hz, 1H), 7.27 (d,  $J = 8.0$  Hz, 1H), 4.33–4.24 (m, 1H), 4.15–4.05 (m, 1H), 3.08 (d,  $J = 13.0$  Hz, 1H), 2.79 (d,  $J = 13.7$  Hz, 1H), 1.85–1.69 (m, 5H), 1.58–1.51 (m, 2H), 1.32 (s, 3H), 1.20 (s, 3H), 1.06 (t,  $J = 7.4$  Hz, 3H);  $^{13}\text{C}$  NMR (100 MHz,  $\text{CDCl}_3$ )  $\delta$  (ppm) 172.9, 158.1, 144.4, 137.7, 133.8, 132.0, 129.6, 129.3, 126.8, 124.4, 123.1, 122.7, 116.2, 112.5, 111.1, 50.2, 48.5, 42.7, 33.3, 30.8, 29.7, 29.0, 28.4, 20.4, 13.9; HRMS (ESI)  $m/z$ : calcd for  $\text{C}_{25}\text{H}_{28}\text{N}_3\text{O}$   $[\text{M} + \text{H}]^+$  386.2227, found 386.2226.

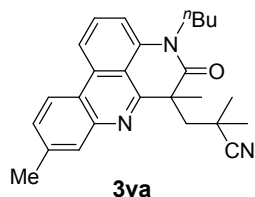

**3-(4-Butyl-6,9-dimethyl-5-oxo-5,6-dihydro-4H-pyrido[4,3,2-gh]phenanthridin-6-yl)-2,2-dimethylpropanenitrile (3va).** Yellow solid (66.3 mg, 83% yield); mp 115–116 °C;  $^1\text{H}$  NMR (400 MHz,  $\text{CDCl}_3$ )  $\delta$  (ppm) 8.44 (d,  $J = 8.4$  Hz, 1H), 8.25 (d,  $J = 8.3$  Hz, 1H), 7.95 (s, 1H), 7.82 (t,  $J = 8.1$  Hz, 1H), 7.50 (d,  $J = 8.4$  Hz, 1H), 7.22 (d,  $J = 8.0$  Hz, 1H), 4.33–4.24(m, 1H), 4.14–4.05 (m, 1H), 3.07 (d,  $J = 13.6$  Hz, 1H), 2.79 (d,  $J = 13.7$  Hz, 1H), 2.62 (s, 3H), 1.83–1.76 (m, 2H), 1.72 (s, 3H), 1.54 (ddd,  $J = 8.9, 7.1, 1.9$  Hz, 2H), 1.32 (s, 3H), 1.20 (s, 3H), 1.06 (t,  $J = 7.4$  Hz, 3H);  $^{13}\text{C}$  NMR (100 MHz,  $\text{CDCl}_3$ )  $\delta$  (ppm) 172.9, 158.0, 144.6, 139.5, 137.6, 133.8, 131.9, 129.1, 128.7, 124.4, 122.5, 120.7, 116.1, 112.3, 110.6, 50.2, 48.6, 42.7, 33.3, 30.8, 29.7, 29.0, 28.4, 21.6, 20.4, 13.9; HRMS (ESI)  $m/z$ : calcd for  $\text{C}_{26}\text{H}_{30}\text{N}_3\text{O}$   $[\text{M} + \text{H}]^+$  400.2383, found 400.2385.

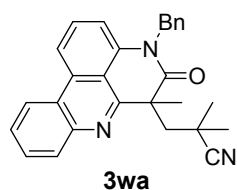

**3-(4-Benzyl-6-methyl-5-oxo-5,6-dihydro-4H-pyrido[4,3,2-gh]phenanthridin-6-yl)-2,2-dimethylpropanenitrile (3wa).** Yellow solid (64.6 mg, 77% yield); mp 159–160 °C;  $^1\text{H}$  NMR (400 MHz,  $\text{CDCl}_3$ )  $\delta$  (ppm) 8.57–8.53 (m, 1H), 8.28 (d,  $J = 8.3$  Hz, 1H), 8.17 (d,  $J = 6.4$  Hz, 1H), 7.82–7.76 (m, 1H), 7.75–7.66 (m, 2H), 7.39–7.35 (m, 4H), 7.33–7.29 (m, 1H), 7.18 (d,  $J = 8.0$  Hz, 1H), 5.97 (d,  $J = 16.4$  Hz, 1H), 5.02 (d,  $J = 16.5$  Hz, 1H), 3.16 (d,  $J = 13.3$  Hz, 1H), 2.87 (d,  $J = 13.7$  Hz, 1H), 1.82 (s, 3H), 1.40 (s, 3H), 1.24 (s, 3H);  $^{13}\text{C}$  NMR (100 MHz,  $\text{CDCl}_3$ )  $\delta$  (ppm) 173.6, 158.1, 144.4, 137.8, 136.3, 133.6, 132.0, 129.6, 129.3, 128.9, 127.3, 126.9, 126.5, 124.6, 123.1, 122.7, 116.5, 112.5, 112.3, 50.8, 48.2, 46.6, 33.5, 30.8, 29.8, 29.4; HRMS (ESI)  $m/z$ : calcd for  $\text{C}_{28}\text{H}_{26}\text{N}_3\text{O}$   $[\text{M} + \text{H}]^+$

420.2070, found 420.2074.

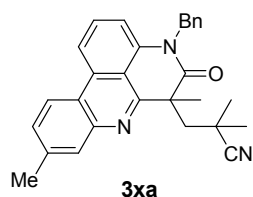

**3-(4-Benzyl-6,9-dimethyl-5-oxo-5,6-dihydro-4H-pyrido[4,3,2-*gh*]phenanthridin-6-yl)-2,2-dimethylpropanenitrile (3xa).** Yellow solid (61.6 mg, 71% yield); mp 156–157 °C;  $^1\text{H}$  NMR (400 MHz,  $\text{CDCl}_3$ )  $\delta$  (ppm) 8.43 (d,  $J = 8.4$  Hz, 1H), 8.22 (d,  $J = 8.3$  Hz, 1H), 7.99 (s, 1H), 7.68 (t,  $J = 8.1$  Hz, 1H), 7.51 (dd,  $J = 8.4, 1.5$  Hz, 1H), 7.41–7.35 (m, 4H), 7.30 (dt,  $J = 8.3, 2.9$  Hz, 1H), 7.15 (d,  $J = 7.9$  Hz, 1H), 5.97 (d,  $J = 16.4$  Hz, 1H), 5.03 (d,  $J = 16.5$  Hz, 1H), 3.17 (d,  $J = 13.6$  Hz, 1H), 2.88 (d,  $J = 13.7$  Hz, 1H), 2.64 (s, 3H), 1.83 (s, 3H), 1.41 (s, 3H), 1.25 (s, 3H);  $^{13}\text{C}$  NMR (100 MHz,  $\text{CDCl}_3$ )  $\delta$  (ppm) 173.6, 157.9, 144.6, 139.5, 137.8, 136.4, 133.6, 131.9, 129.1, 128.9, 128.7, 127.3, 126.5, 124.6, 122.5, 120.8, 116.4, 112.2, 111.8, 50.7, 48.3, 46.6, 33.5, 30.8, 29.8, 29.5, 21.7; HRMS (ESI)  $m/z$ : calcd for  $\text{C}_{29}\text{H}_{28}\text{N}_3\text{O}$  [ $\text{M} + \text{H}$ ] $^+$  434.2227, found 434.2227.

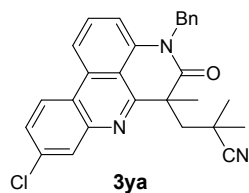

**3-(4-Benzyl-9-chloro-6-methyl-5-oxo-5,6-dihydro-4H-pyrido[4,3,2-*gh*]phenanthridin-6-yl)-2,2-dimethylpropanenitrile (3ya).** White solid (31.8 mg, 35% yield); mp 154–155 °C;  $^1\text{H}$  NMR (400 MHz,  $\text{CDCl}_3$ )  $\delta$  (ppm) 8.45 (d,  $J = 8.8$  Hz, 1H), 8.20 (d,  $J = 8.3$  Hz, 1H), 8.16 (d,  $J = 2.1$  Hz, 1H), 7.72 (t,  $J = 8.2$  Hz, 1H), 7.62 (dd,  $J = 8.8, 2.2$  Hz, 1H), 7.36 (d,  $J = 4.4$  Hz, 4H), 7.31–7.29 (m, 1H), 7.19 (d,  $J = 8.0$  Hz, 1H), 5.94 (d,  $J = 16.4$  Hz, 1H), 5.02 (d,  $J = 16.4$  Hz, 1H), 3.12 (d,  $J = 13.7$  Hz, 1H), 2.84 (d,  $J = 13.7$  Hz, 1H), 1.80 (s, 3H), 1.40 (s, 3H), 1.25 (s, 3H);  $^{13}\text{C}$  NMR (100 MHz,  $\text{CDCl}_3$ )  $\delta$  (ppm) 173.4, 159.5, 145.1, 138.0, 136.2, 135.0, 133.2, 132.4, 128.9, 128.8, 127.5, 127.4, 126.4, 124.5, 124.1, 121.6, 116.4, 112.5, 50.9, 48.2, 46.6, 33.5, 30.7, 29.9, 29.4; HRMS (ESI)  $m/z$ : calcd for  $\text{C}_{28}\text{H}_{25}\text{ClN}_3\text{O}$  [ $\text{M} + \text{H}$ ] $^+$  454.1681, found 454.1680.

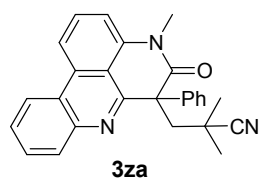

**2,2-Dimethyl-3-(4-methyl-5-oxo-6-phenyl-5,6-dihydro-4H-pyrido[4,3,2-*gh*]phenanthridin-6-**

**yl)propanenitrile (3za)**. White solid (43.8 mg, 54% yield); mp 224–225 °C;  $^1\text{H}$  NMR (400 MHz,  $\text{CDCl}_3$ )  $\delta$  (ppm) 8.60 (dd,  $J = 8.2, 1.1$  Hz, 1H), 8.32 (d,  $J = 8.2$  Hz, 1H), 8.24 (d,  $J = 8.0$  Hz, 1H), 7.86–7.79 (m, 2H), 7.75–7.70 (m, 1H), 7.25 (d,  $J = 7.9$  Hz, 1H), 7.19–7.12 (m, 5H), 3.67 (s, 3H), 3.50 (d,  $J = 13.4$  Hz, 1H), 3.16 (d,  $J = 13.4$  Hz, 1H), 1.58 (s, 3H), 1.52 (s, 3H);  $^{13}\text{C}$  NMR (100 MHz,  $\text{CDCl}_3$ )  $\delta$  (ppm) 171.3, 156.6, 144.2, 143.1, 138.7, 133.3, 132.1, 129.9, 129.3, 128.6, 127.4, 127.2, 126.6, 125.0, 123.3, 122.8, 116.5, 113.5, 111.5, 59.9, 47.2, 30.9, 30.7, 30.4, 30.4; HRMS (ESI)  $m/z$ : calcd for  $\text{C}_{27}\text{H}_{24}\text{N}_3\text{O}$  [ $\text{M} + \text{H}$ ] $^+$  406.1914, found 406.1914.

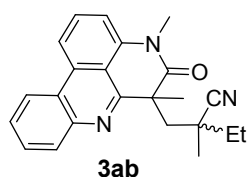

**2-((4,6-Dimethyl-5-oxo-5,6-dihydro-4H-pyrido[4,3,2-gh]phenanthridin-6-yl)methyl)-2-methylbutanenitrile (3ab)**, two inseparable diastereoisomers, d.r. = 1:1). Brown solid (55.8 mg, 78% yield); mp 123–124 °C;  $^1\text{H}$  NMR (400 MHz,  $\text{CDCl}_3$ )  $\delta$  (ppm) 8.56 (d,  $J = 7.7$  Hz, 1H), 8.30 (dd,  $J = 8.3, 4.1$  Hz, 1H), 8.15 (t,  $J = 8.5$  Hz, 1H), 7.84 (td,  $J = 8.1, 3.5$  Hz, 1H), 7.80–7.75 (m, 1H), 7.70–7.64 (m, 1H), 7.27 (dd,  $J = 7.7, 3.7$  Hz, 1H), 3.64 (d,  $J = 1.2$  Hz, 3H), 3.18 (d,  $J = 13.7$  Hz, 0.5H), 2.91 (q,  $J = 13.7$  Hz, 1H), 2.69 (d,  $J = 13.8$  Hz, 0.5H), 1.76 (d,  $J = 6.9$  Hz, 3H), 1.69 (dt,  $J = 13.2, 6.6$  Hz, 0.5H), 1.62–1.50 (m, 1H), 1.45–1.35 (m, 0.5H), 1.25 (s, 1.5H), 1.02 (t,  $J = 7.4$  Hz, 1.5H), 0.96–0.90 (m, 3H);  $^{13}\text{C}$  NMR (100 MHz,  $\text{CDCl}_3$ )  $\delta$  (ppm) 173.4, 173.0, 158.5, 158.0, 144.5, 144.4, 138.8, 138.5, 133.5, 133.4, 132.2, 131.9, 129.7, 129.5, 129.3, 126.9, 126.8, 123.4, 123.4, 123.0, 122.8, 122.7, 116.5, 116.2, 112.4, 112.4, 111.2, 111.1, 50.3, 50.1, 47.9, 47.3, 35.7, 35.5, 35.1, 34.8, 33.2, 33.1, 29.9, 25.8, 25.3, 9.2, 9.1; HRMS (ESI)  $m/z$ : calcd for  $\text{C}_{23}\text{H}_{24}\text{N}_3\text{O}$  [ $\text{M} + \text{H}$ ] $^+$  358.1914, found 358.1912.

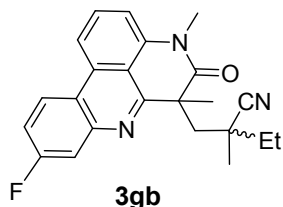

**2-((9-Fluoro-4,6-dimethyl-5-oxo-5,6-dihydro-4H-pyrido[4,3,2-gh]phenanthridin-6-yl)methyl)-2-methylbutanenitrile (3gb)**, two inseparable diastereoisomers, d.r. = 1:1). White solid (56.3 mg, 75% yield); mp 157–158 °C;  $^1\text{H}$  NMR (400 MHz,  $\text{CDCl}_3$ )  $\delta$  (ppm) 8.55–8.49 (m, 1H), 8.21 (dd,  $J = 8.3, 3.5$  Hz, 1H), 7.85 (td,  $J = 8.1, 3.6$  Hz, 1H), 7.78 (ddd,  $J = 9.9, 7.6, 2.6$  Hz, 1H), 7.45–7.37 (m, 1H),

7.26 (dd,  $J = 7.9, 3.3$  Hz, 1H), 3.63 (s, 3H), 3.13 (d,  $J = 13.8$  Hz, 0.5H), 2.93–2.83 (m, 1H), 2.67 (d,  $J = 13.8$  Hz, 0.5H), 1.75 (d,  $J = 3.9$  Hz, 3H), 1.71–1.66 (m, 0.5H), 1.60–1.51 (m, 1H), 1.41 (dd,  $J = 13.8, 7.4$  Hz, 0.5H), 1.24 (s, 1.5H), 1.01 (t,  $J = 7.4$  Hz, 1.5H), 0.96–0.91 (m, 3H);  $^{13}\text{C}$  NMR (100 MHz,  $\text{CDCl}_3$ )  $\delta$  (ppm) 173.3, 172.9, 163.0 (d,  $J = 247.2$  Hz), 160.0, 159.5, 145.9 (d,  $J = 12.9$  Hz), 145.7 (d,  $J = 12.5$  Hz), 138.9, 138.6, 133.3, 133.2, 132.6, 132.4, 124.8 (d,  $J = 9.6$  Hz), 124.8 (d,  $J = 9.6$  Hz), 123.4, 123.3, 119.8 (d,  $J = 1.6$  Hz), 119.8 (d,  $J = 1.6$  Hz), 116.3, 116.0 (d,  $J = 23.8$  Hz), 116.0 (d,  $J = 23.8$  Hz), 116.0, 114.0 (d,  $J = 20.2$  Hz), 113.9 (d,  $J = 20.0$  Hz), 112.1 (d,  $J = 0.9$  Hz), 112.0 (d,  $J = 0.9$  Hz), 111.0, 110.9, 50.4, 50.1, 47.9, 47.4, 35.7, 35.4, 35.0, 34.0, 33.2, 33.1, 29.9, 25.8, 25.2, 9.2, 9.0; HRMS (ESI)  $m/z$ : calcd for  $\text{C}_{23}\text{H}_{23}\text{FN}_3\text{O}$  [ $\text{M} + \text{H}$ ] $^+$  376.1820, found 376.1818.

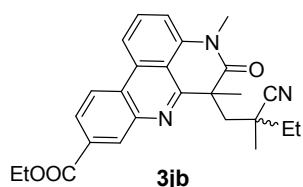

**Ethyl 6-(2-cyano-2-methylbutyl)-4,6-dimethyl-5-oxo-5,6-dihydro-4H-pyrido[4,3,2-gh]**

**phenanthridine-9-carboxylate (3jb)**, two inseparable diastereoisomers, d.r. = 1:1). White solid (60.1 mg, 70% yield); mp 180–181 °C;  $^1\text{H}$  NMR (400 MHz,  $\text{CDCl}_3$ )  $\delta$  (ppm) 8.82 (dd,  $J = 5.9, 1.2$  Hz, 1H), 8.59 (dd,  $J = 8.6, 3.4$  Hz, 1H), 8.35–8.26 (m, 2H), 7.90 (td,  $J = 8.1, 4.0$  Hz, 1H), 7.34 (dd,  $J = 7.9, 3.6$  Hz, 1H), 4.55–4.46 (m, 2H), 3.64 (s, 3H), 3.17 (d,  $J = 13.8$  Hz, 0.5H), 2.90 (q,  $J = 13.7$  Hz, 1H), 2.68 (d,  $J = 13.8$  Hz, 0.5H), 1.77 (d,  $J = 2.0$  Hz, 3H), 1.72–1.68 (m, 0.5H), 1.61–1.53 (m, 1H), 1.53–1.47 (m, 3H), 1.41 (dd,  $J = 13.9, 7.3$  Hz, 0.5H), 1.26 (s, 1.5H), 1.01 (t,  $J = 7.4$  Hz, 1.5H), 0.95–0.90 (m, 3H);  $^{13}\text{C}$  NMR (100 MHz,  $\text{CDCl}_3$ )  $\delta$  (ppm) 173.2, 172.8, 166.4, 166.3, 159.8, 159.2, 143.9, 143.8, 139.0, 138.7, 132.9, 132.8, 132.6, 132.4, 131.6, 131.4, 131.1, 131.1, 126.7, 126.2, 123.3, 123.0, 123.0, 116.9, 116.7, 113.1, 112.9, 112.2, 112.0, 61.4, 61.3, 50.4, 50.2, 48.0, 47.7, 35.7, 35.5, 35.1, 34.9, 33.2, 33.1, 29.9, 25.9, 25.3, 14.4, 9.1, 9.0; HRMS (ESI)  $m/z$ : calcd for  $\text{C}_{26}\text{H}_{28}\text{N}_3\text{O}_3$  [ $\text{M} + \text{H}$ ] $^+$  430.2125, found 430.2124.

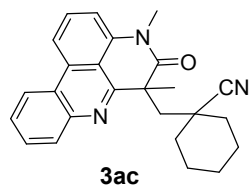

**1-((4,6-Dimethyl-5-oxo-5,6-dihydro-4H-pyrido[4,3,2-gh]phenanthridin-6-yl)methyl)cyclohexane-1-carbonitrile (3ac)**. White solid (44.5 mg, 58% yield); mp 143–144 °C;  $^1\text{H}$

NMR (400 MHz, CDCl<sub>3</sub>)  $\delta$  (ppm) 8.57 (d,  $J$  = 7.5 Hz, 1H), 8.31 (d,  $J$  = 8.3 Hz, 1H), 8.14 (d,  $J$  = 7.9 Hz, 1H), 7.86 (t,  $J$  = 8.1 Hz, 1H), 7.80–7.75 (m, 1H), 7.70–7.65 (m, 1H), 7.30–7.26 (m, 1H), 3.64 (s, 3H), 3.07 (d,  $J$  = 13.6 Hz, 1H), 2.76 (d,  $J$  = 13.7 Hz, 1H), 1.98–1.92 (m, 1H), 1.73 (s, 3H), 1.55 (dt,  $J$  = 6.9, 4.7 Hz, 3H), 1.47–1.39 (m, 3H), 1.30–1.16 (m, 2H), 1.06 (ddd,  $J$  = 15.7, 12.0, 5.9 Hz, 1H); <sup>13</sup>C NMR (100 MHz, CDCl<sub>3</sub>)  $\delta$  (ppm) 173.3, 158.5, 144.5, 138.8, 133.4, 132.0, 129.6, 129.2, 126.7, 123.1, 122.7, 122.5, 116.3, 112.4, 111.1, 50.2, 48.9, 37.8, 37.7, 37.1, 33.1, 29.9, 24.9, 23.0, 22.8; HRMS (ESI)  $m/z$ : calcd for C<sub>25</sub>H<sub>26</sub>N<sub>3</sub>O [M + H]<sup>+</sup> 384.2070, found 384.2072.

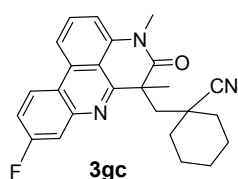

**1-((9-Fluoro-4,6-dimethyl-5-oxo-5,6-dihydro-4H-pyrido[4,3,2-gh]phenanthridin-6-yl)methyl)cyclohexane-1-carbonitrile (3gc).** White solid (37.7 mg, 47% yield); mp 198–199 °C; <sup>1</sup>H NMR (400 MHz, CDCl<sub>3</sub>)  $\delta$  (ppm) 8.53 (dd,  $J$  = 8.9, 6.0 Hz, 1H), 8.22 (d,  $J$  = 8.3 Hz, 1H), 7.85 (t,  $J$  = 8.1 Hz, 1H), 7.78 (d,  $J$  = 9.7 Hz, 1H), 7.46–7.38 (m, 1H), 7.30–7.24 (m, 1H), 3.63 (d,  $J$  = 1.4 Hz, 3H), 3.05 (d,  $J$  = 13.7 Hz, 1H), 2.75 (d,  $J$  = 13.7 Hz, 1H), 1.96–1.90 (m, 1H), 1.73 (s, 3H), 1.58 (dd,  $J$  = 23.8, 10.4 Hz, 3H), 1.45 (dd,  $J$  = 13.9, 5.1 Hz, 3H), 1.31–1.18 (m, 2H), 1.13–1.03 (m, 1H); <sup>13</sup>C NMR (100 MHz, CDCl<sub>3</sub>)  $\delta$  173.2, 163.0 (d,  $J$  = 247.2 Hz), 160.0, 145.8 (d,  $J$  = 12.1 Hz), 138.9, 133.3, 132.4, 124.7 (d,  $J$  = 9.6 Hz), 122.4, 119.8 (d,  $J$  = 1.8 Hz), 116.0, 116.0 (d,  $J$  = 23.7 Hz), 113.9 (d,  $J$  = 20.3 Hz), 112.1, 110.9, 50.3, 49.0, 37.9, 37.6, 37.1, 33.1, 29.9, 24.9, 22.9, 22.8; HRMS (ESI)  $m/z$ : calcd for C<sub>25</sub>H<sub>25</sub>FN<sub>3</sub>O [M + H]<sup>+</sup> 402.1976, found 402.1974.

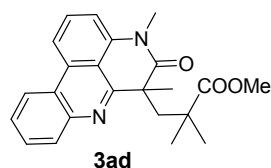

**Methyl 3-(4,6-dimethyl-5-oxo-5,6-dihydro-4H-pyrido[4,3,2-gh]phenanthridin-6-yl)-2,2-dimethylpropanoate (3ad).** Yellow oil (55.0 mg, 73% yield); <sup>1</sup>H NMR (400 MHz, CDCl<sub>3</sub>)  $\delta$  (ppm) 8.53 (d,  $J$  = 7.7 Hz, 1H), 8.27 (d,  $J$  = 8.3 Hz, 1H), 8.13 (d,  $J$  = 6.6 Hz, 1H), 7.83 (t,  $J$  = 8.1 Hz, 1H), 7.77–7.72 (m, 1H), 7.66–7.61 (m, 1H), 7.23 (d,  $J$  = 7.9 Hz, 1H), 3.57 (s, 3H), 3.18 (s, 3H), 3.12 (d,  $J$  = 13.9 Hz, 1H), 2.83 (d,  $J$  = 14.0 Hz, 1H), 1.76 (s, 3H), 1.02 (s, 3H), 0.86 (s, 3H); <sup>13</sup>C NMR (100 MHz, CDCl<sub>3</sub>)  $\delta$  (ppm) 177.6, 173.6, 159.2, 144.5, 138.8, 133.3, 131.9, 129.6, 129.1, 126.6, 122.8, 122.6, 116.1,

112.3, 110.8, 51.5, 50.8, 49.6, 41.7, 33.3, 29.7, 27.1, 25.7; HRMS (ESI)  $m/z$ : calcd for  $C_{23}H_{25}N_2O_3$  [M + H]<sup>+</sup> 377.1860, found 377.1860;

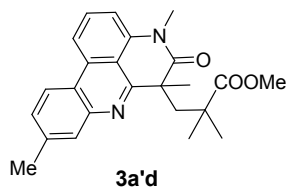

**Methyl 2,2-dimethyl-3-(4,6,9-trimethyl-5-oxo-5,6-dihydro-4H-pyrido[4,3,2-*gh*]phenanthridin-6-yl)propanoate (3a'd).** Yellow oil (55.4 mg, 71% yield); <sup>1</sup>H NMR (400 MHz, CDCl<sub>3</sub>)  $\delta$  (ppm) 8.39 (d,  $J$  = 8.4 Hz, 1H), 8.21 (d,  $J$  = 8.2 Hz, 1H), 7.92 (s, 1H), 7.78 (t,  $J$  = 8.1 Hz, 1H), 7.45 (dd,  $J$  = 8.4, 1.5 Hz, 1H), 7.18 (d,  $J$  = 7.8 Hz, 1H), 3.56 (s, 3H), 3.18 (s, 3H), 3.09 (d,  $J$  = 14.0 Hz, 1H), 2.82 (d,  $J$  = 14.0 Hz, 1H), 2.59 (s, 3H), 1.74 (s, 3H), 1.02 (s, 3H), 0.85 (s, 3H); <sup>13</sup>C NMR (100 MHz, CDCl<sub>3</sub>)  $\delta$  (ppm) 177.6, 173.7, 159.1, 144.7, 139.3, 138.7, 133.3, 131.7, 129.1, 128.4, 122.4, 120.4, 115.9, 112.0, 110.3, 51.5, 50.9, 49.6, 41.7, 33.3, 29.7, 27.0, 25.9, 21.6; HRMS (ESI)  $m/z$ : calcd for  $C_{24}H_{27}N_2O_3$  [M + H]<sup>+</sup> 391.2016, found 391.2015.

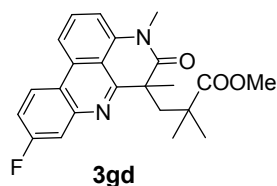

**Methyl 3-(9-fluoro-4,6-dimethyl-5-oxo-5,6-dihydro-4H-pyrido[4,3,2-*gh*]phenanthridin-6-yl)-2,2-dimethylpropanoate (3gd).** White solid (60.0 mg, 76% yield); mp 140–141 °C; <sup>1</sup>H NMR (400 MHz, CDCl<sub>3</sub>)  $\delta$  (ppm) 8.49 (dd,  $J$  = 9.1, 5.9 Hz, 1H), 8.18 (d,  $J$  = 8.2 Hz, 1H), 7.82 (t,  $J$  = 8.1 Hz, 1H), 7.75 (dd,  $J$  = 9.9, 2.6 Hz, 1H), 7.38 (ddd,  $J$  = 9.0, 8.1, 2.7 Hz, 1H), 7.22 (d,  $J$  = 7.9 Hz, 1H), 3.57 (s, 3H), 3.21 (s, 3H), 3.07 (d,  $J$  = 14.0 Hz, 1H), 2.82 (d,  $J$  = 14.0 Hz, 1H), 1.73 (s, 3H), 1.01 (s, 3H), 0.85 (s, 3H); <sup>13</sup>C NMR (100 MHz, CDCl<sub>3</sub>)  $\delta$  (ppm) 177.6, 173.5, 162.9 (d,  $J$  = 247.2 Hz), 160.7, 145.8 (d,  $J$  = 12.0 Hz), 138.9, 133.1, 132.3, 124.7 (d,  $J$  = 9.6 Hz), 119.5 (d,  $J$  = 1.9 Hz), 115.8, 115.8 (d,  $J$  = 23.8 Hz), 113.9 (d,  $J$  = 20.1 Hz), 111.9 (d,  $J$  = 0.9 Hz), 110.6, 51.5, 50.8, 49.7, 41.7, 33.3, 29.7, 27.1, 25.8; HRMS (ESI)  $m/z$ : calcd for  $C_{23}H_{24}FN_2O_3$  [M + H]<sup>+</sup> 395.1765, found 395.1763.

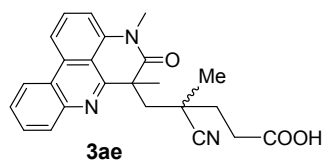

**4-Cyano-5-(4,6-dimethyl-5-oxo-5,6-dihydro-4H-pyrido[4,3,2-*gh*]phenanthridin-6-yl)-4-**



**methylpentanoic acid (3ae**, two inseparable diastereoisomers, d.r. = 1.25:1). White solid (50.0 mg, 61% yield); mp 202–203 °C; <sup>1</sup>H NMR (400 MHz, CDCl<sub>3</sub>) δ (ppm) 8.57 (dd, *J* = 7.8, 3.7 Hz, 1H), 8.33 (dd, *J* = 8.3, 2.0 Hz, 1H), 8.20–8.11 (m, 1H), 7.87 (td, *J* = 8.1, 3.2 Hz, 1H), 7.78 (t, *J* = 7.2 Hz, 1H), 7.69 (dt, *J* = 11.0, 5.5 Hz, 1H), 7.29 (dd, *J* = 8.4, 2.6 Hz, 1H), 3.64 (s, 3H), 3.19 (d, *J* = 13.7 Hz, 0.54H), 3.02 (d, *J* = 13.6 Hz, 0.43H), 2.88 (d, *J* = 13.7 Hz, 0.44H), 2.74 (d, *J* = 13.8 Hz, 0.53H), 2.68–2.38 (m, 2.22H), 2.04–1.79 (m, 1.78H), 1.74 (d, *J* = 9.6 Hz, 3H), 1.32 (s, 1.62H), 1.07 (s, 1.30H); <sup>13</sup>C NMR (100 MHz, CDCl<sub>3</sub>) δ (ppm) 177.8, 177.8, 173.2, 173.1, 158.0, 157.8, 144.3, 138.7, 138.5, 133.6, 133.5, 132.3, 132.1, 129.5, 129.5, 129.4, 129.3, 127.0, 123.1, 122.8, 122.7, 122.6, 116.6, 116.4, 112.4, 112.3, 111.3, 111.2, 50.4, 50.4, 47.2, 46.4, 36.0, 34.6, 34.4, 33.3, 33.2, 30.0, 29.7, 29.5, 26.6, 26.3; HRMS (ESI) *m/z*: calcd for C<sub>24</sub>H<sub>24</sub>N<sub>3</sub>O<sub>3</sub> [M + H]<sup>+</sup> 402.1812, found 402.1810.

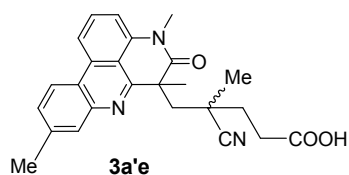

**4-Cyano-4-methyl-5-(4,6,9-trimethyl-5-oxo-5,6-dihydro-4H-pyrido[4,3,2-*gh*]phenanthridin-6-yl)pentanoic acid (3a'e**, two inseparable diastereoisomers, d.r. = 1:1). White solid (47.4 mg, 57% yield); mp 189–190 °C; <sup>1</sup>H NMR (400 MHz, CDCl<sub>3</sub>) δ (ppm) 8.44 (dd, *J* = 8.3, 4.1 Hz, 1H), 8.27 (d, *J* = 8.2 Hz, 1H), 7.96 (d, *J* = 13.7 Hz, 1H), 7.84 (td, *J* = 8.1, 3.3 Hz, 1H), 7.51 (dd, *J* = 7.0, 4.0 Hz, 1H), 7.25 (dd, *J* = 7.8, 3.6 Hz, 1H), 3.63 (s, 3H), 3.17 (d, *J* = 13.7 Hz, 0.5H), 3.00 (d, *J* = 13.7 Hz, 0.5H), 2.88 (d, *J* = 13.7 Hz, 0.5H), 2.77–2.39 (m, 5.5H), 1.96 (ddd, *J* = 15.7, 10.3, 4.7 Hz, 1H), 1.90–1.66 (m, 4H), 1.31 (s, 1.5H), 1.06 (s, 1.5H); <sup>13</sup>C NMR (100 MHz, CDCl<sub>3</sub>) δ (ppm) 177.9, 177.8, 173.3, 173.1, 157.9, 157.6, 144.5, 139.6, 138.6, 138.4, 133.6, 133.5, 132.1, 132.0, 129.0, 128.9, 128.8, 122.7, 122.6, 122.5, 122.5, 120.8, 116.5, 116.3, 112.1, 112.0, 110.9, 110.7, 50.3, 50.3, 47.2, 46.5, 36.0, 35.9, 34.6, 34.4, 33.2, 33.1, 30.0, 29.7, 29.5, 26.5, 26.2, 21.6; HRMS (ESI) *m/z*: calcd for C<sub>25</sub>H<sub>26</sub>N<sub>3</sub>O<sub>3</sub> [M + H]<sup>+</sup> 416.1969, found 416.1968.

### 3. Reduction of the product 3aa

3-(4,6-Dimethyl-5-oxo-5,6-dihydro-4H-pyrido[4,3,2-*gh*]phenanthridin-6-yl)-2,2-dimethylpropanenitrile (**3aa**) (0.2 mmol) was added to a 25 mL sealed tube with a Teflon lined cap, and the internal atmosphere were exchanged with argon gas for three times. Then methanol (4 mL) was added. The mixture was cooled to 0 °C and NaBH<sub>4</sub> (0.6 mmol) was added in

portions. The mixture was stirred at room temperature for 12 h. After the reaction was completed, the reaction mixture was quenched by water and extracted with EtOAc (15 × 3 mL). The combined organic layers were washed with brine (15 mL), dried over anhydrous Na<sub>2</sub>SO<sub>4</sub>, filtered and concentrated in *vacuo*. The residue was purified by silica gel chromatography using hexane/ethyl acetate (2:1) as eluent to afford the pure product **4aa**.

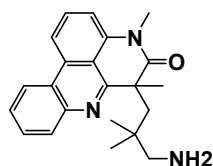

**4aa**

**6-(3-Amino-2,2-dimethylpropyl)-4,6-dimethyl-4H-pyrido[4,3,2-*gh*]phenanthridin-5(6H)-one (4aa)**. Yellow oil (38.2 mg, 55% yield); <sup>1</sup>H NMR (400 MHz, CDCl<sub>3</sub>) δ 8.50 (d, *J* = 8.0 Hz, 1H), 8.19–8.04 (m, 1H), 7.90 (d, *J* = 8.0 Hz, 1H), 7.77–7.54 (m, 3H), 6.80 (d, *J* = 8.0 Hz, 1H), 6.05 (s, 1H), 5.48 (s, 1H), 3.44 (d, *J* = 11.6 Hz, 1H), 3.34–3.26 (m, 1H), 3.10 (s, 3H), 2.46 (s, 2H), 1.55 (s, 3H), 1.14 (s, 3H), 1.08 (s, 3H); <sup>13</sup>C NMR (100 MHz, CDCl<sub>3</sub>) δ 181.1, 162.0, 157.5, 147.8, 134.2, 128.7, 128.6, 126.3, 123.8, 122.7, 111.9, 109.9, 109.1, 107.9, 61.7, 46.7, 41.9, 41.8, 39.6, 30.0, 29.7, 26.2; HRMS (ESI) *m/z*: calcd for C<sub>22</sub>H<sub>26</sub>N<sub>3</sub>O [M + H]<sup>+</sup> 348.2070, found 348.2072.

#### 4. References

- 1 X. Li, X. Fang, S. Zhuang, P. Liu and P. Sun, *Org. Lett.*, 2017, **19**, 3580.

## 5. NMR spectra of the products 3 and 4aa

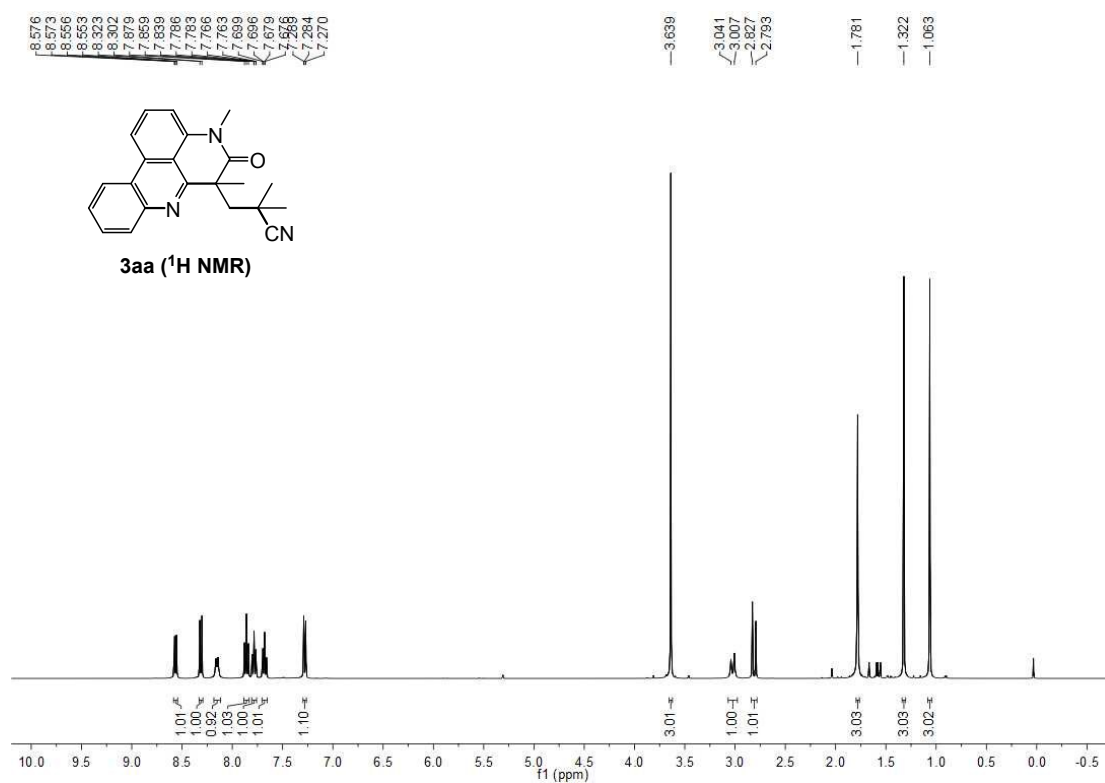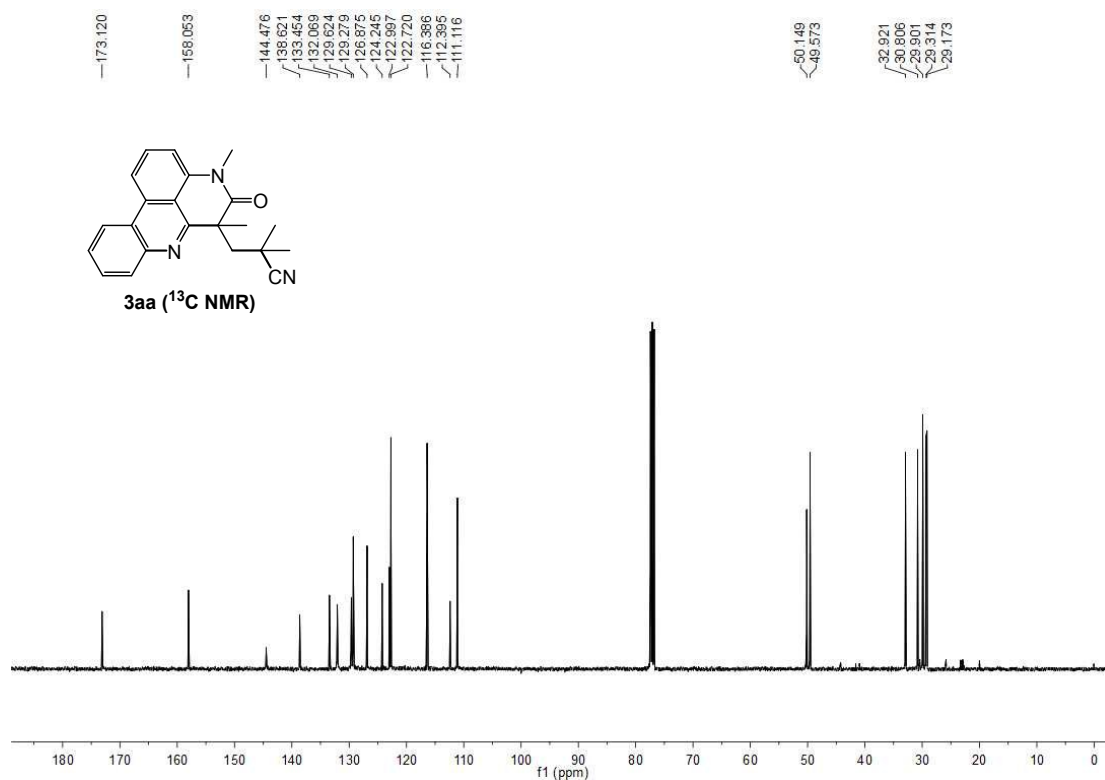

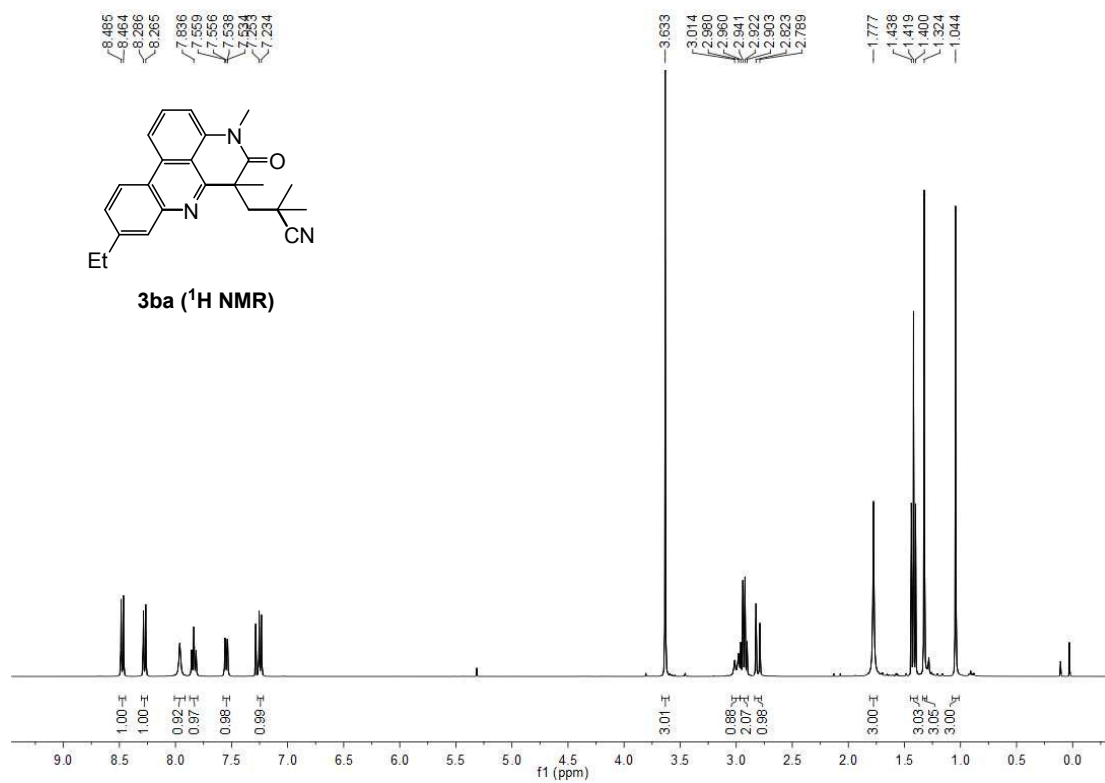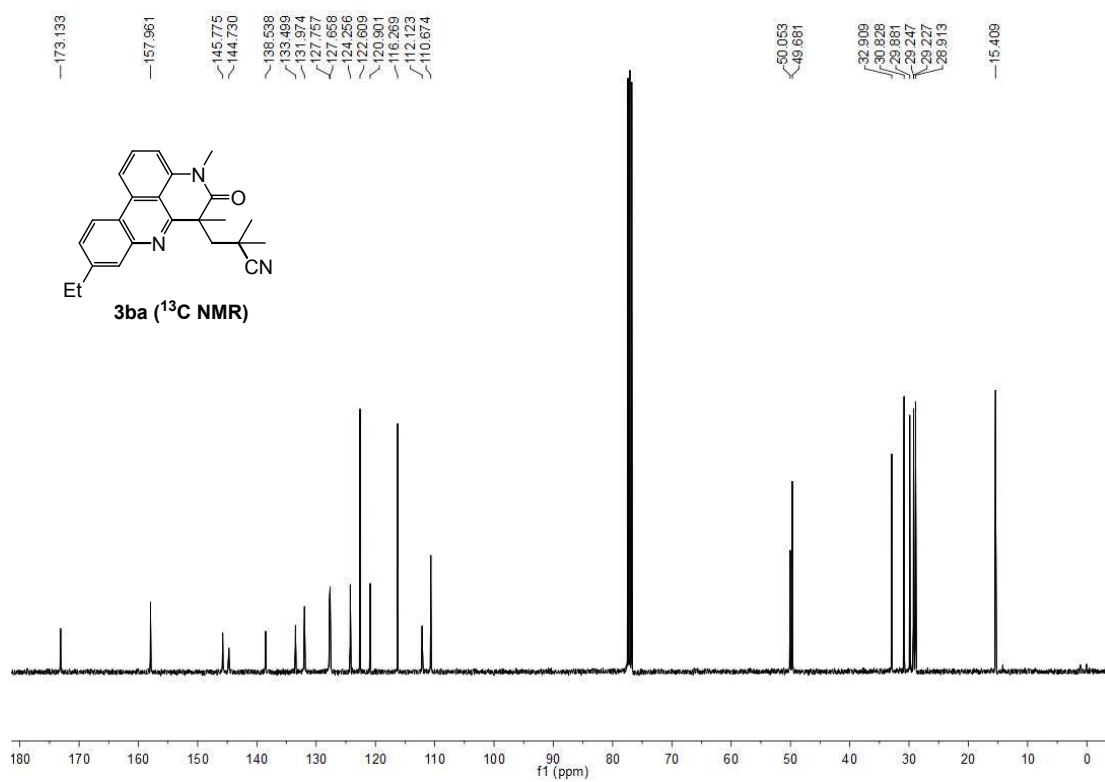

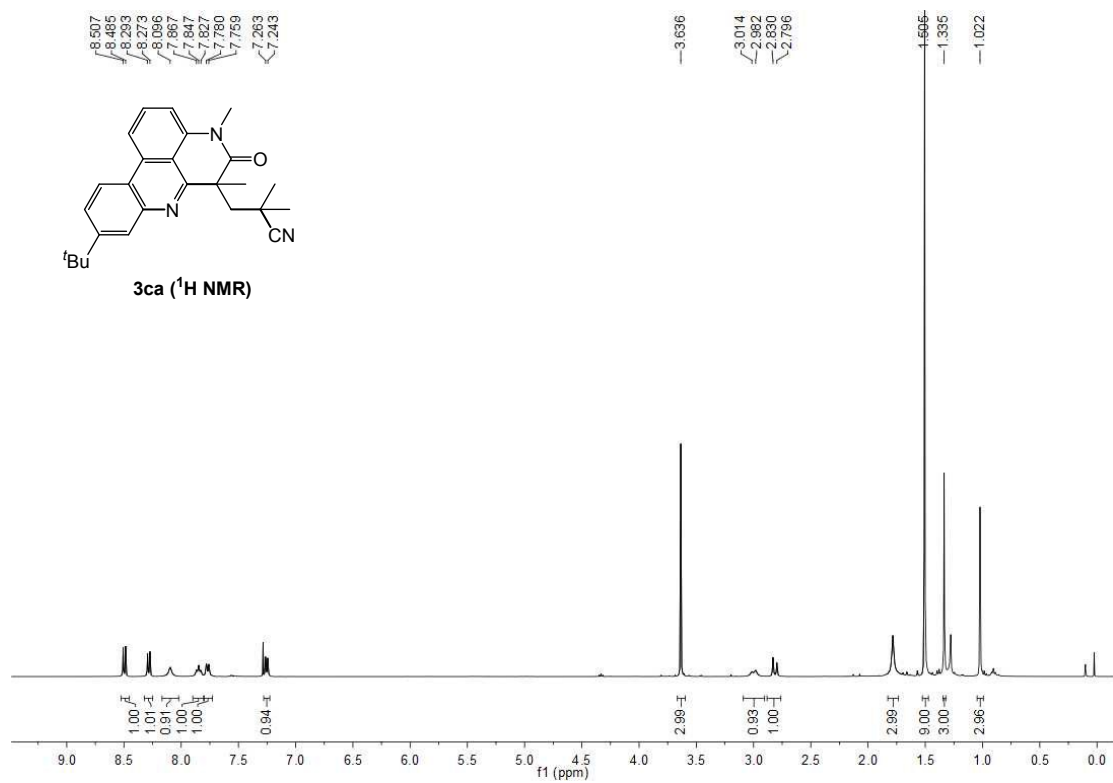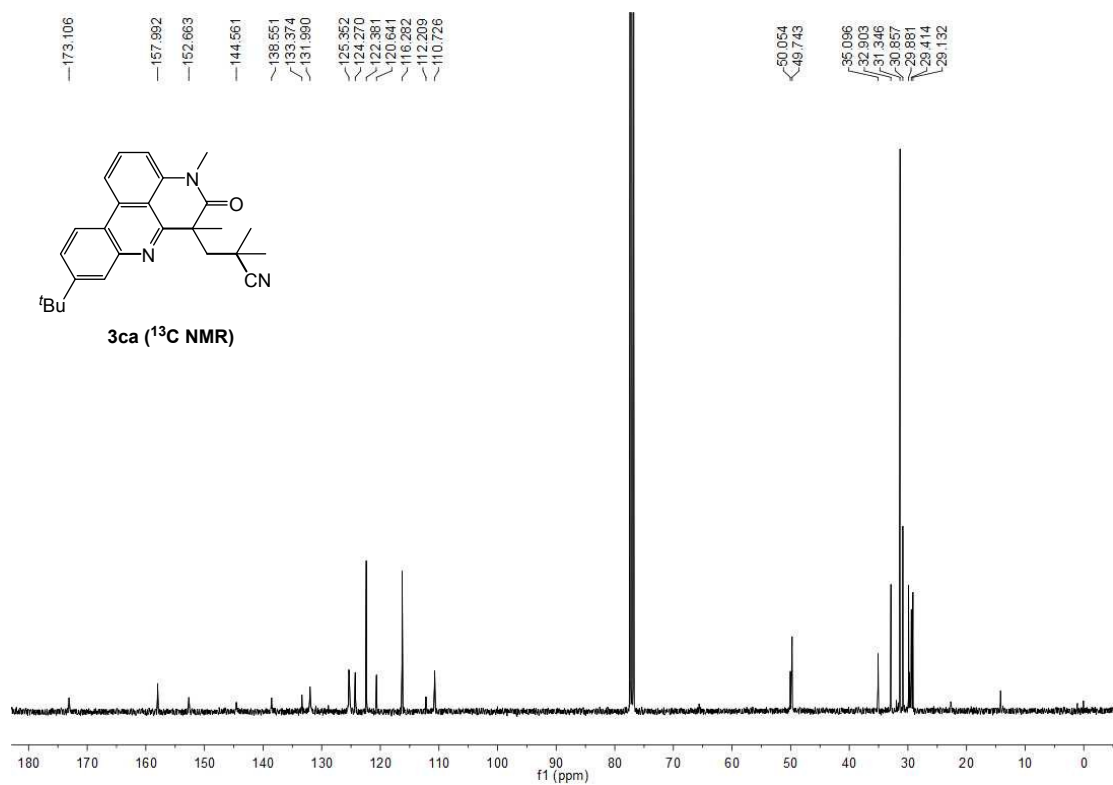

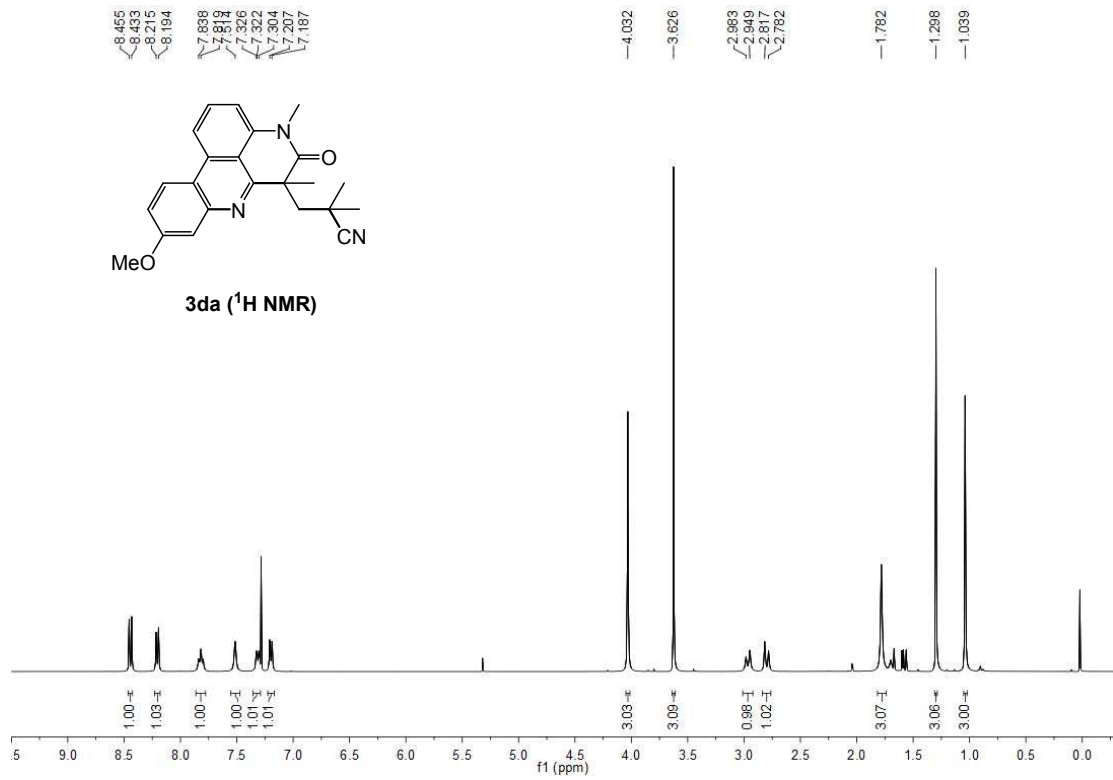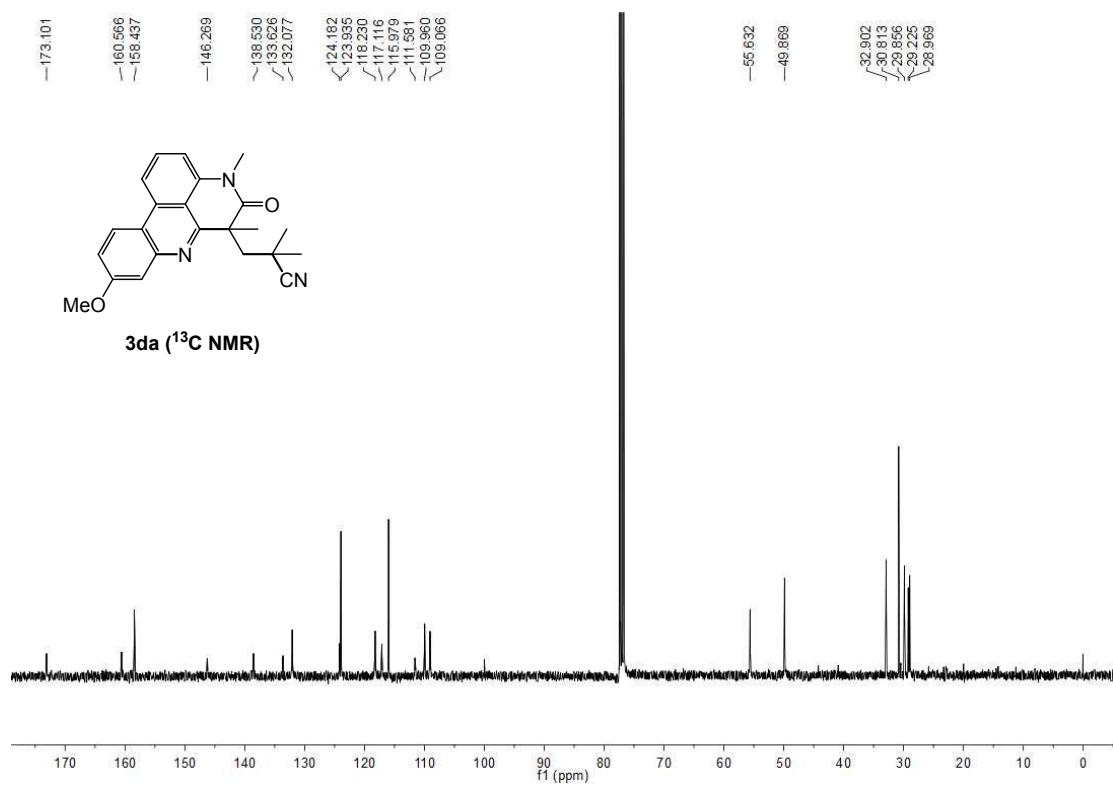

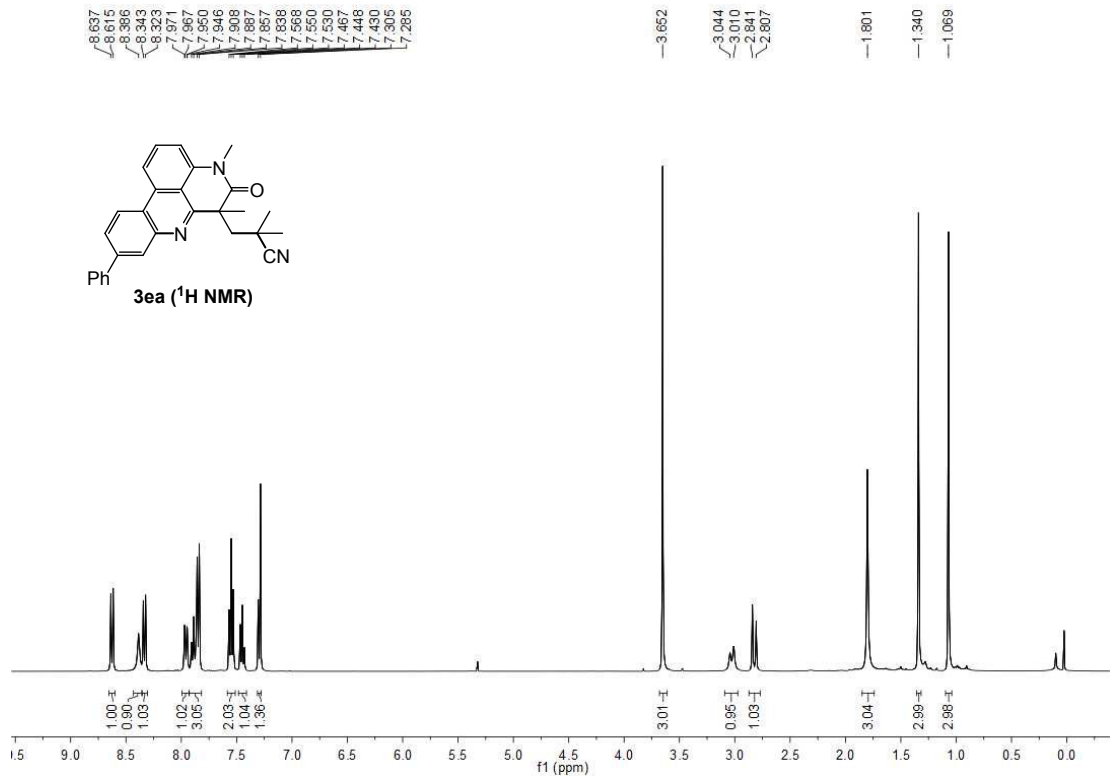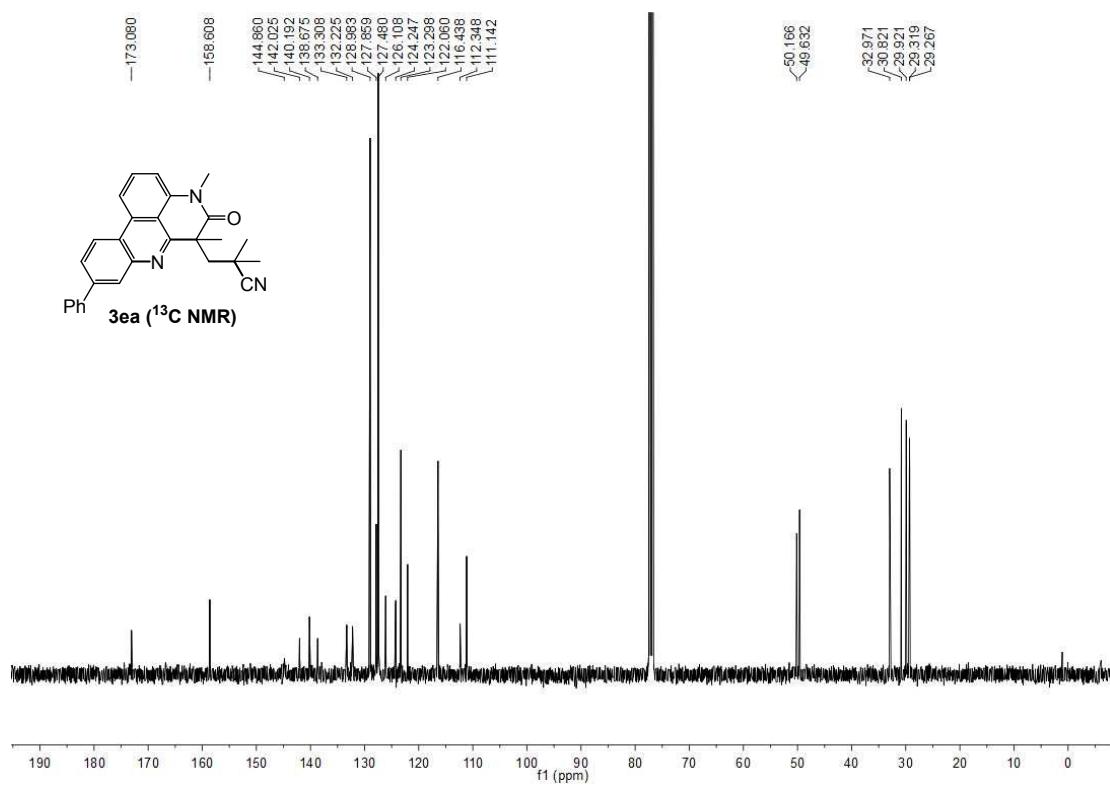

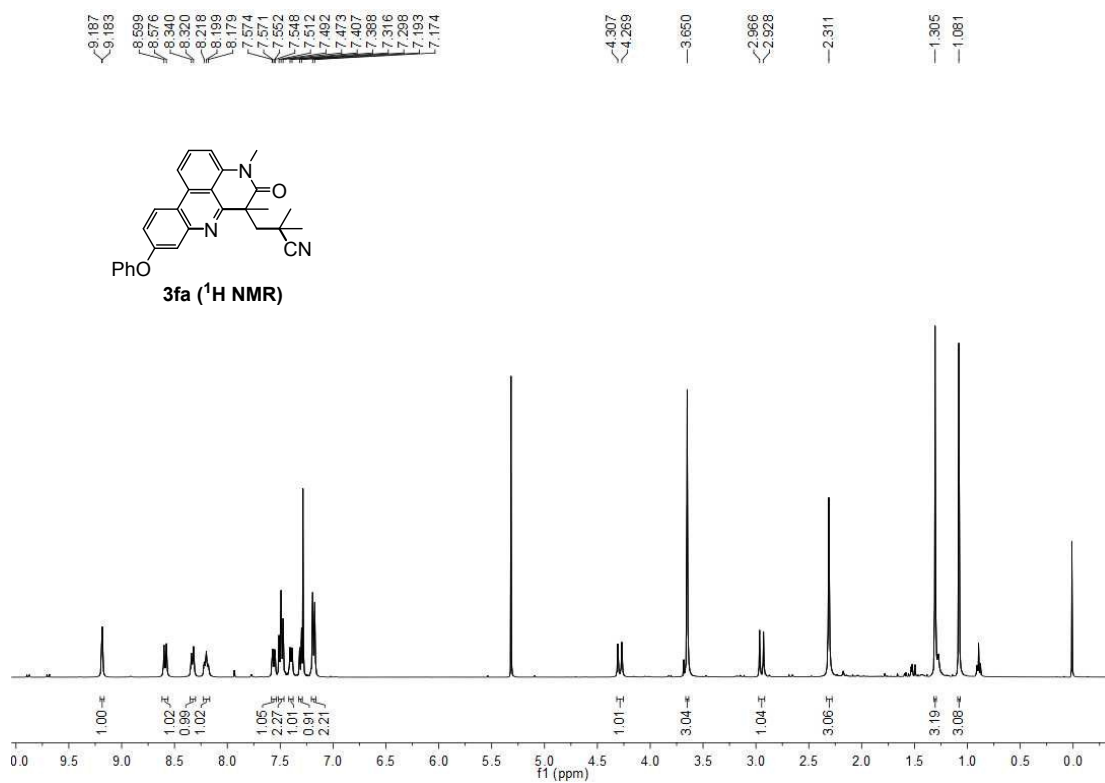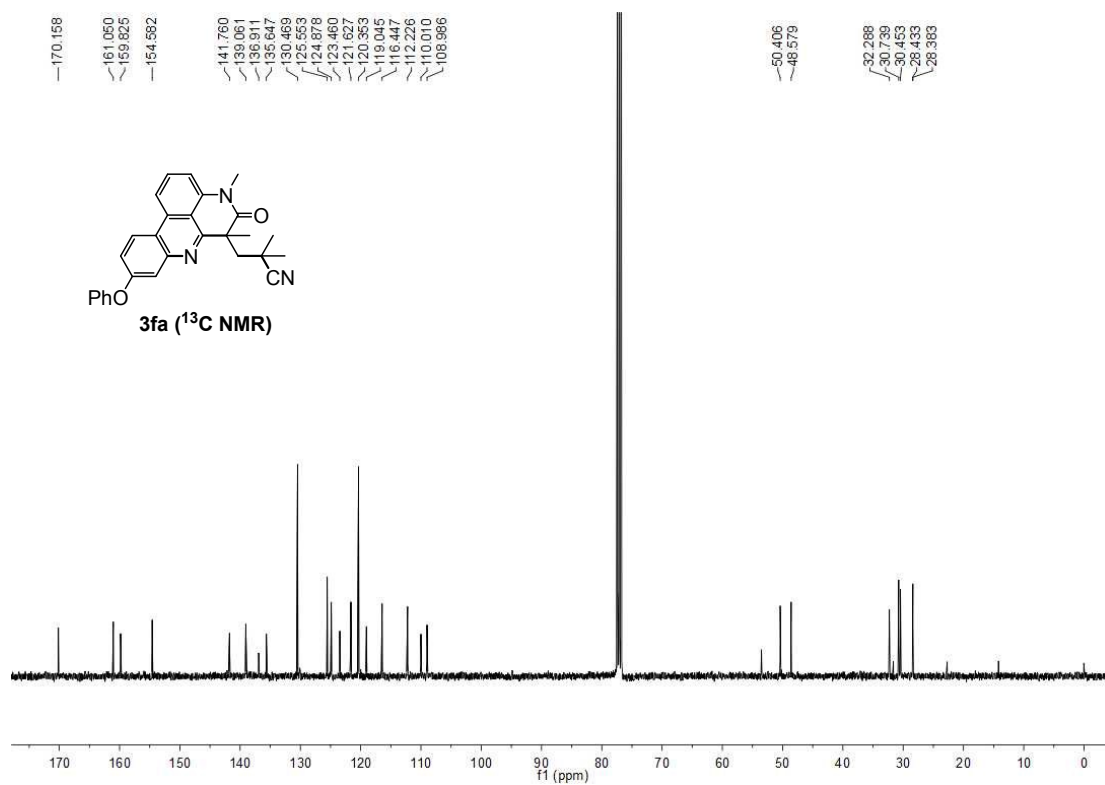



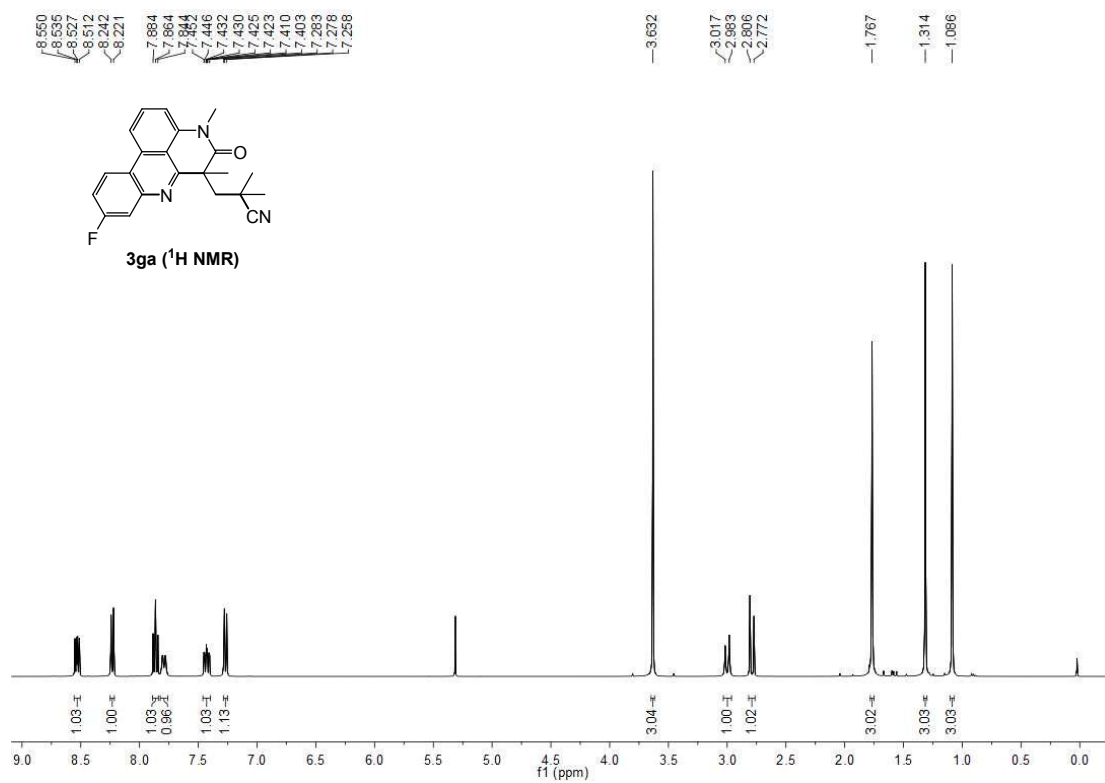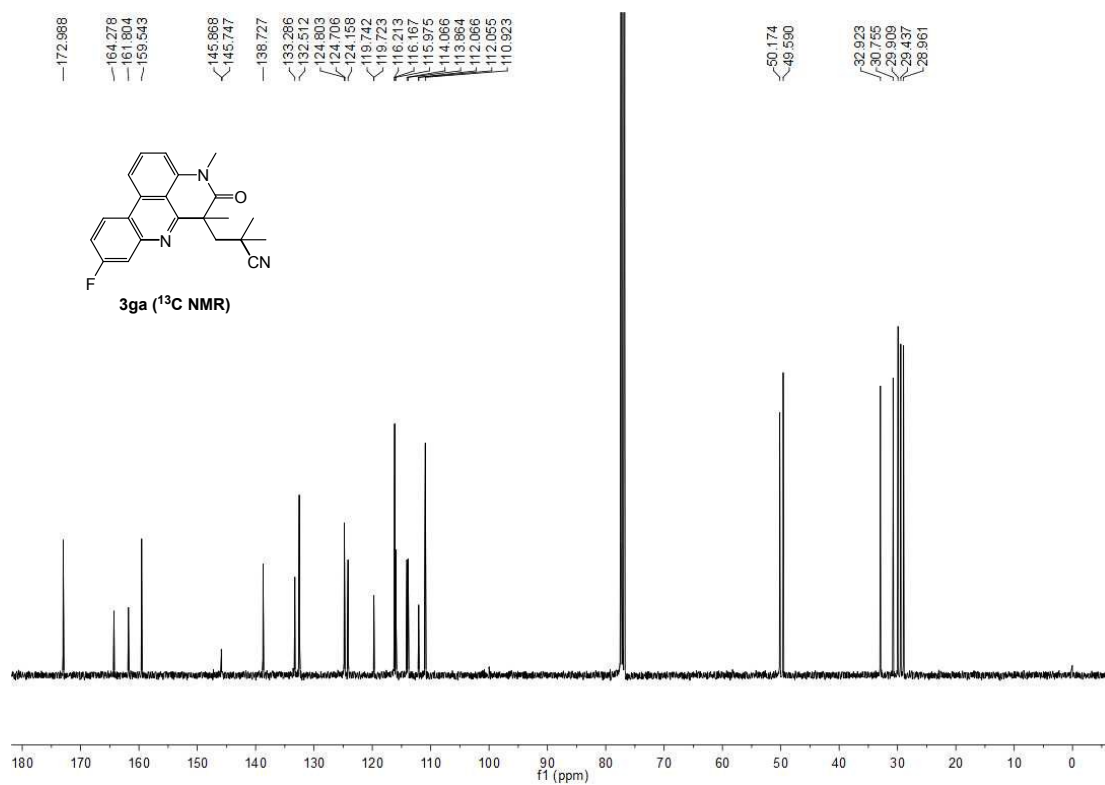

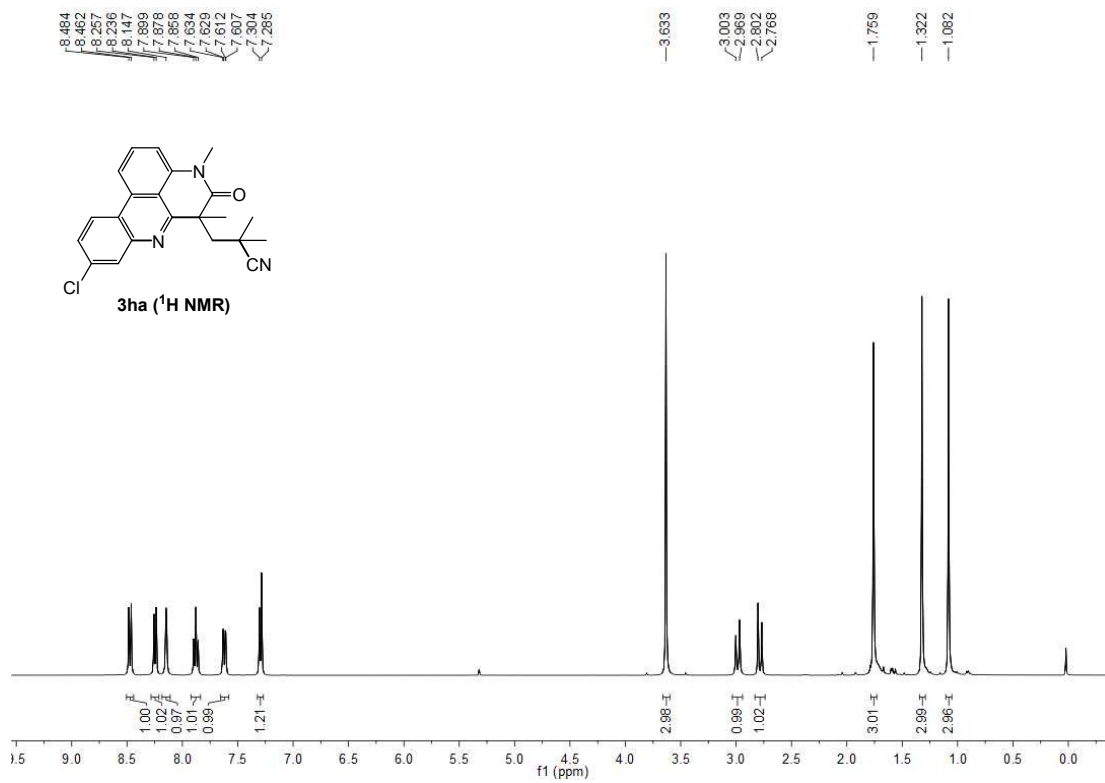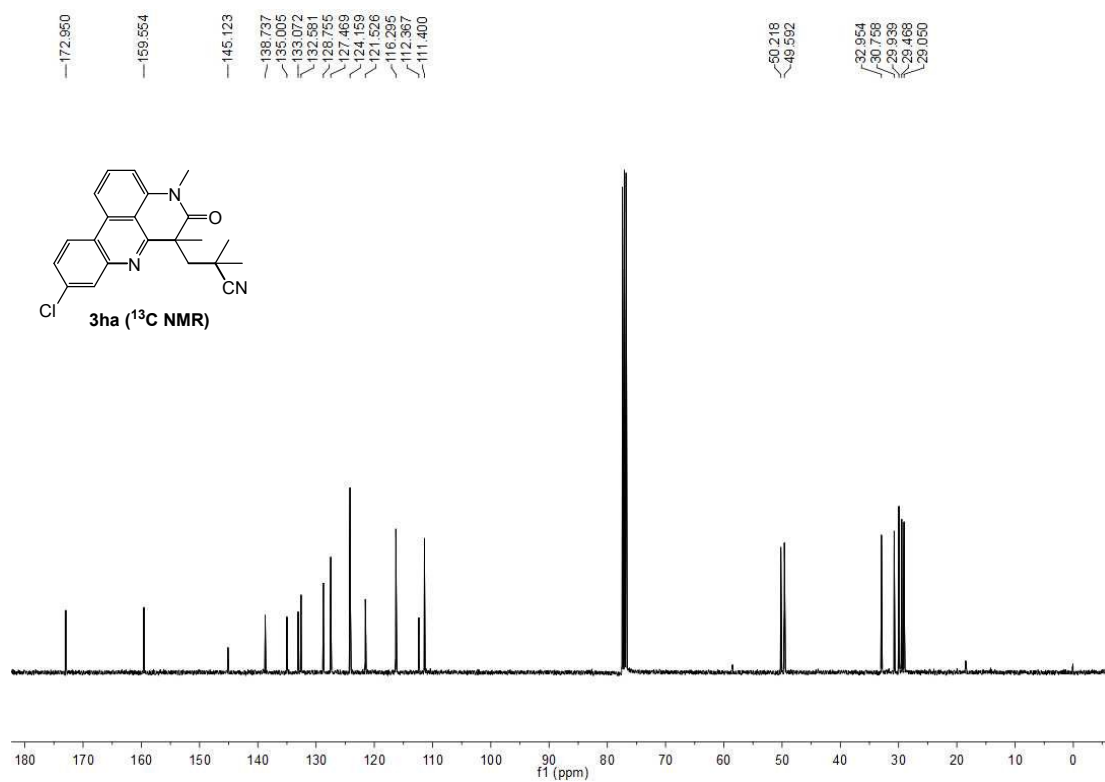

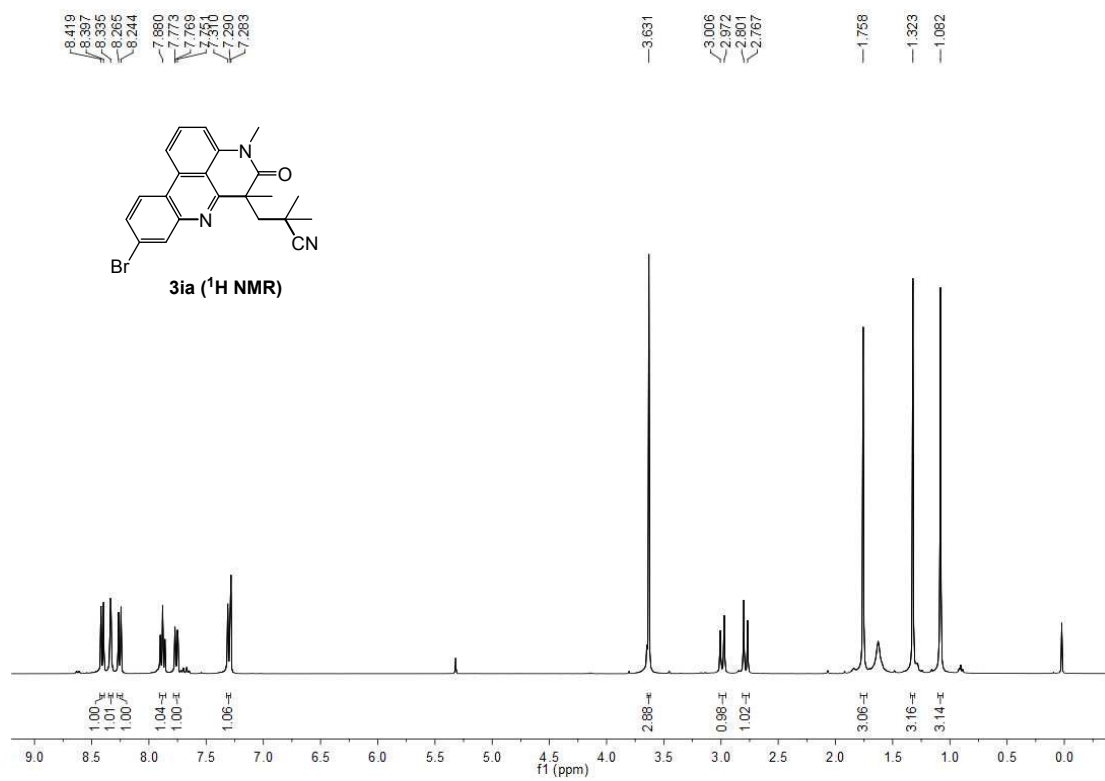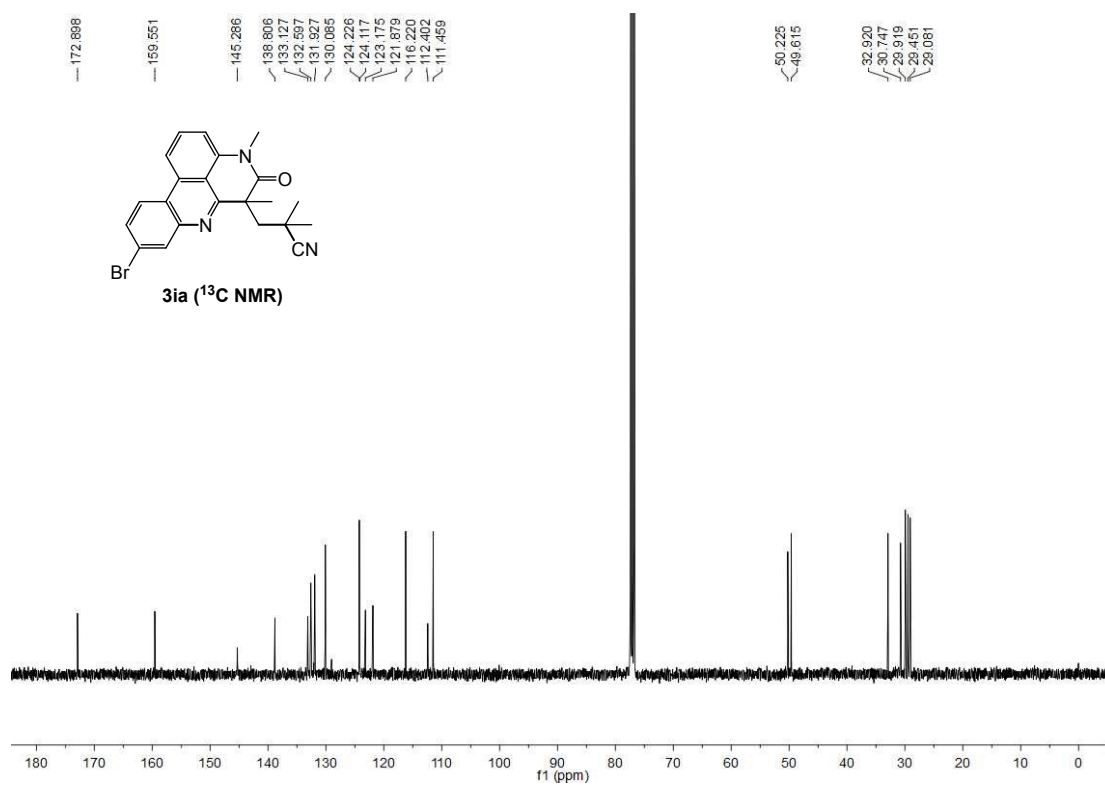

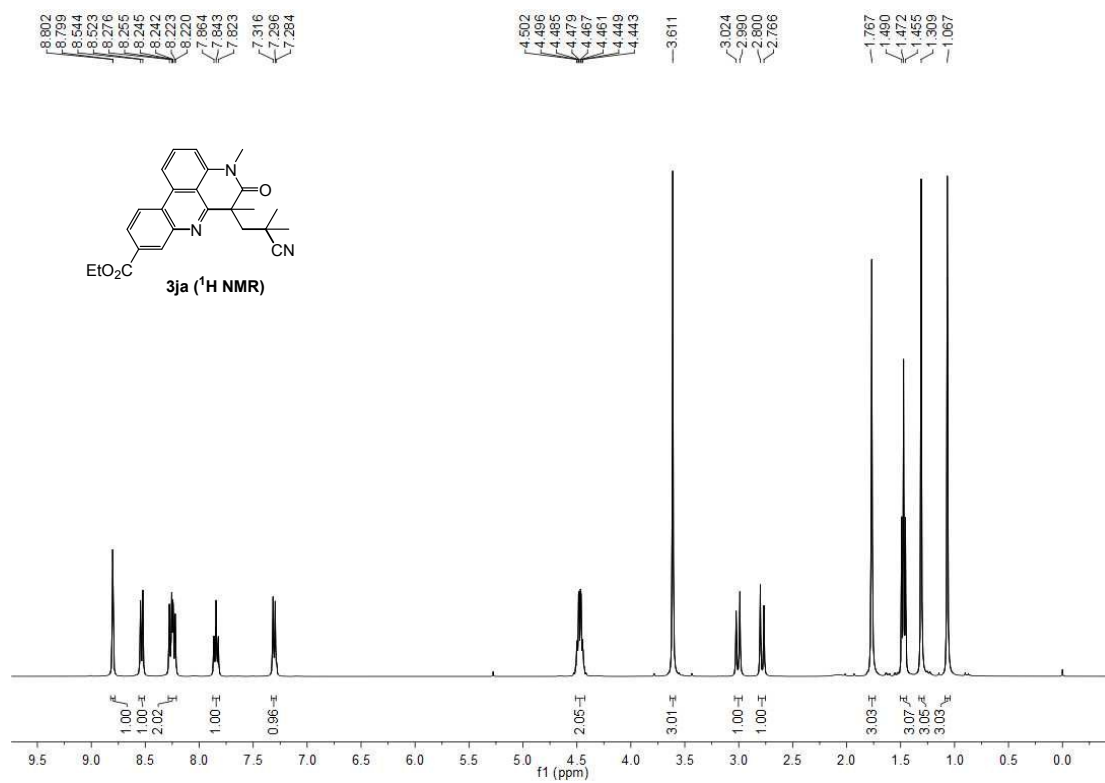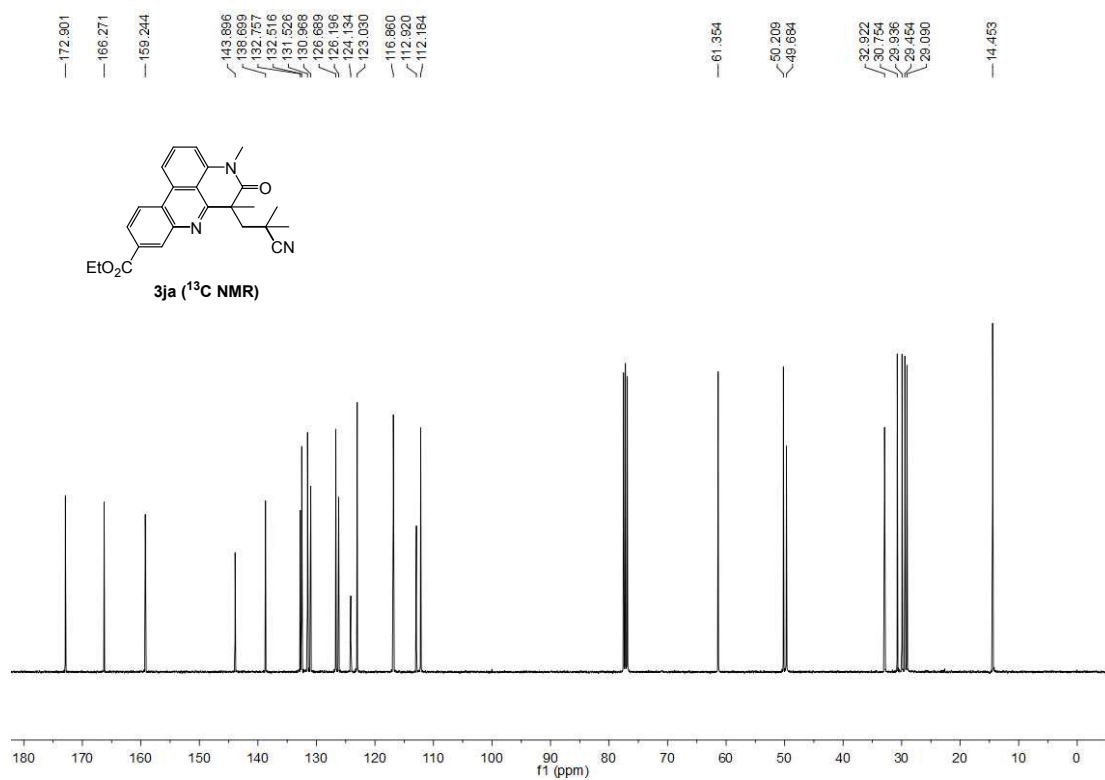

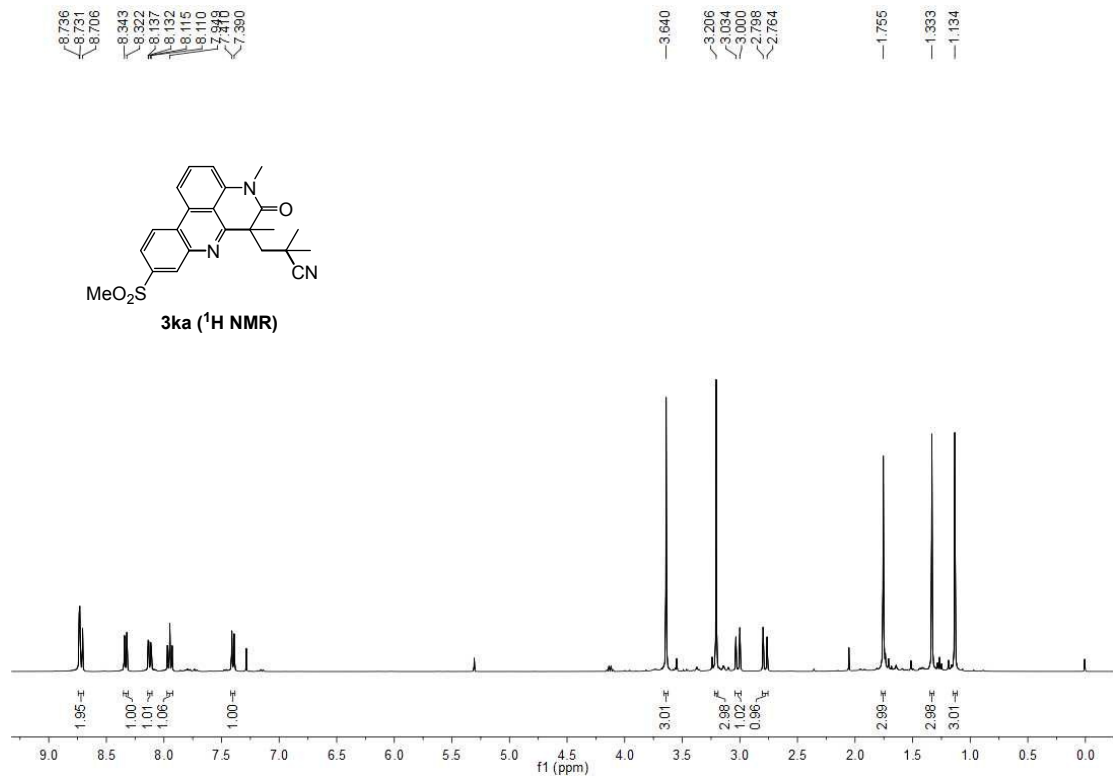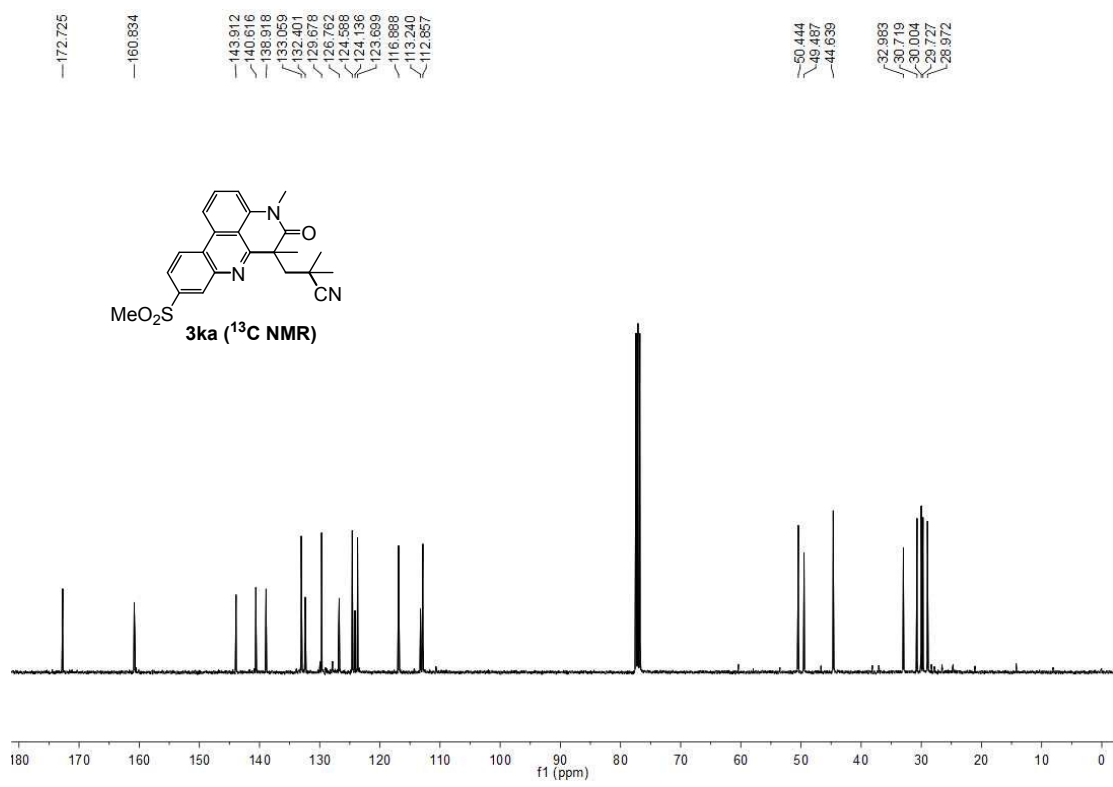

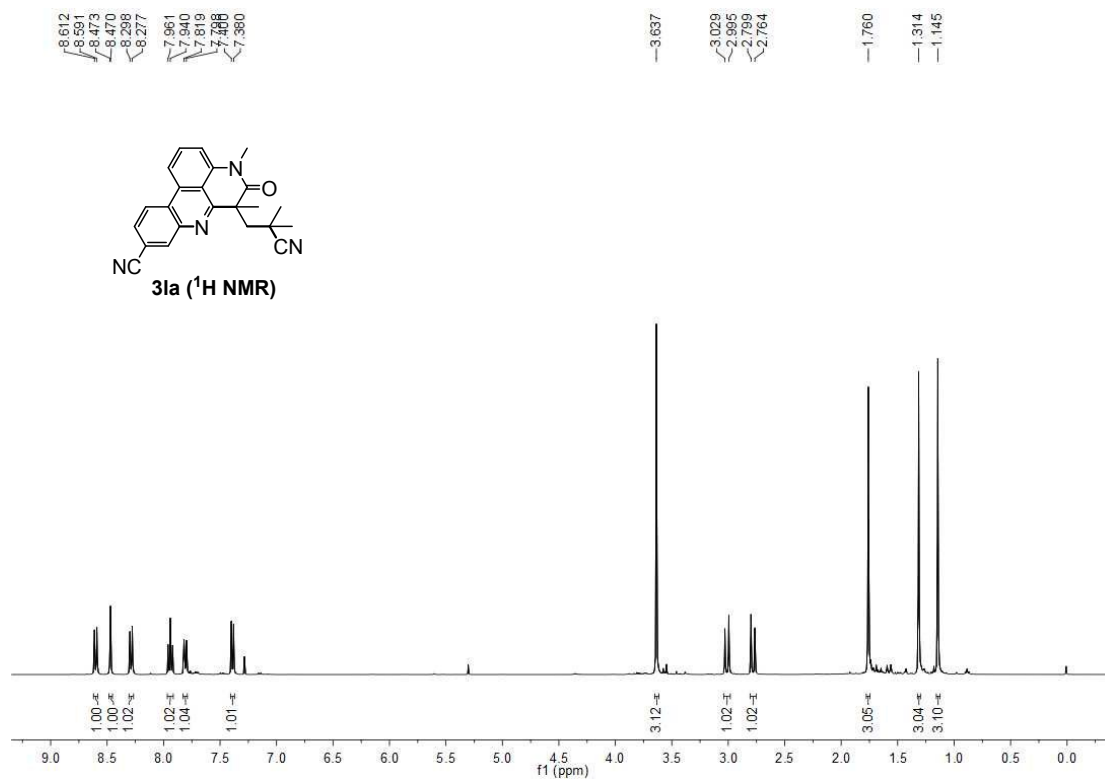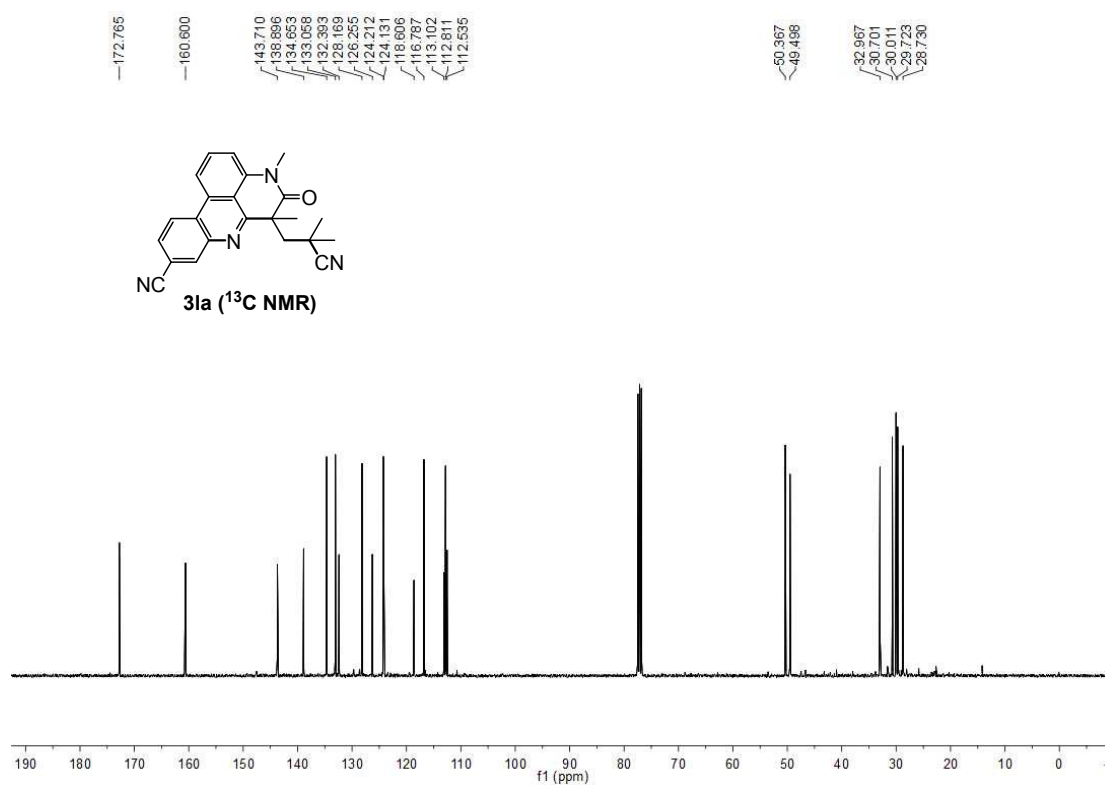

8.665  
8.643  
8.438  
8.331  
8.310  
7.644  
7.524  
7.504  
7.392  
7.354

3.648  
3.039  
3.005  
2.822  
2.788  
1.777  
1.341  
1.109

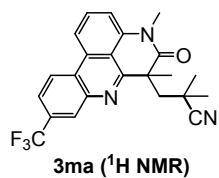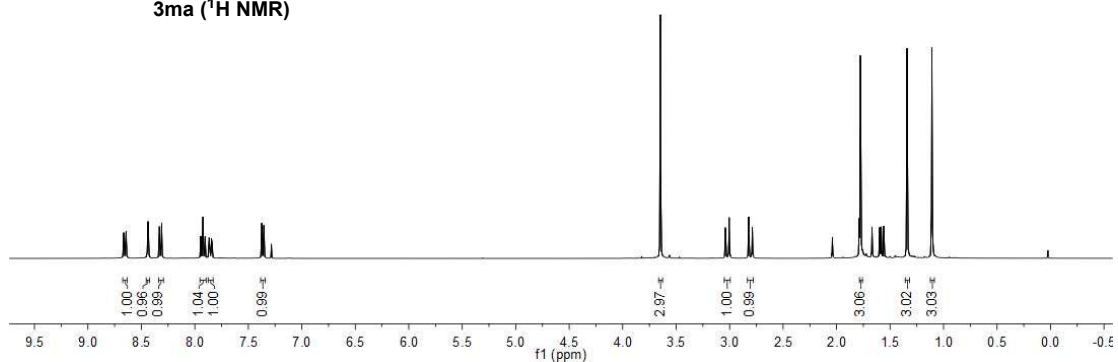

172.851  
159.986  
143.794  
138.829  
132.756  
132.685  
131.495  
131.170  
130.844  
130.518  
128.142  
127.144  
127.103  
127.062  
127.020  
127.020  
125.305  
125.297  
124.125  
123.893  
122.728  
122.694  
122.662  
122.629  
122.586  
120.021  
116.830  
113.005  
112.237  
50.314  
49.621  
32.938  
30.749  
29.957  
29.536  
29.055

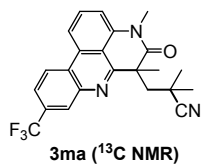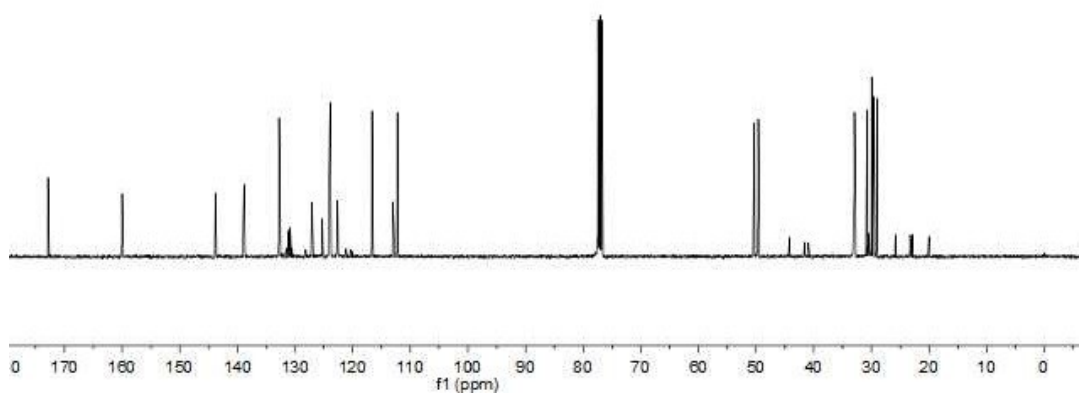

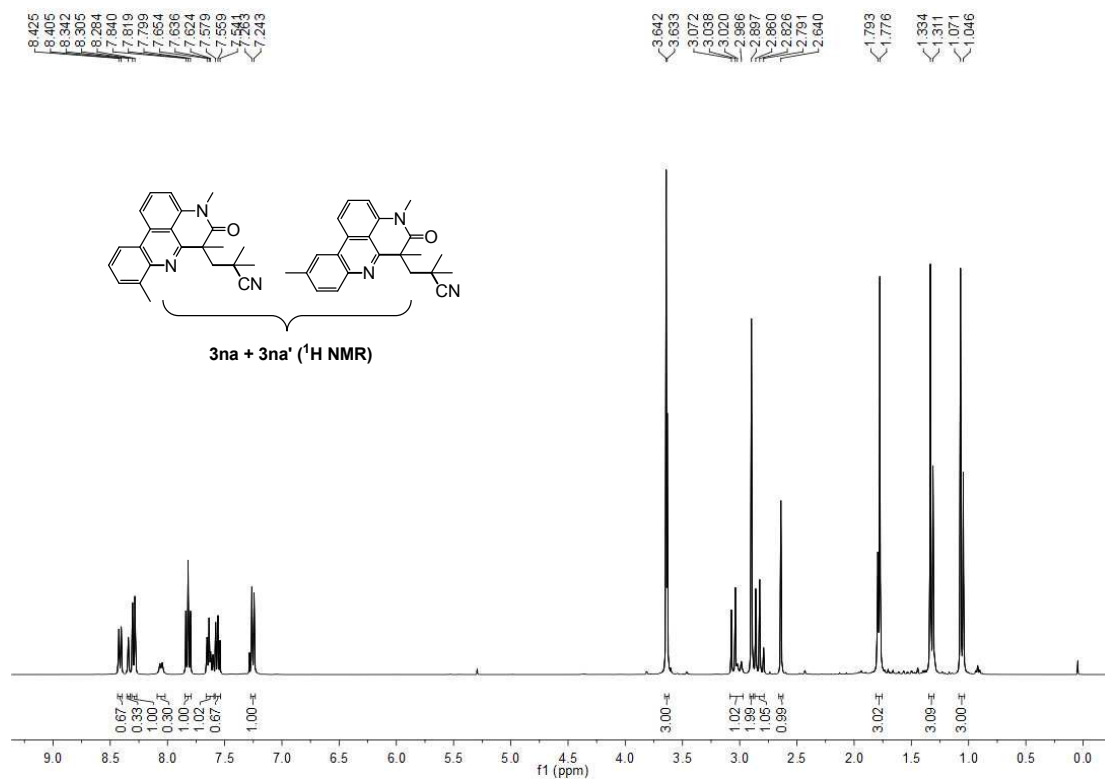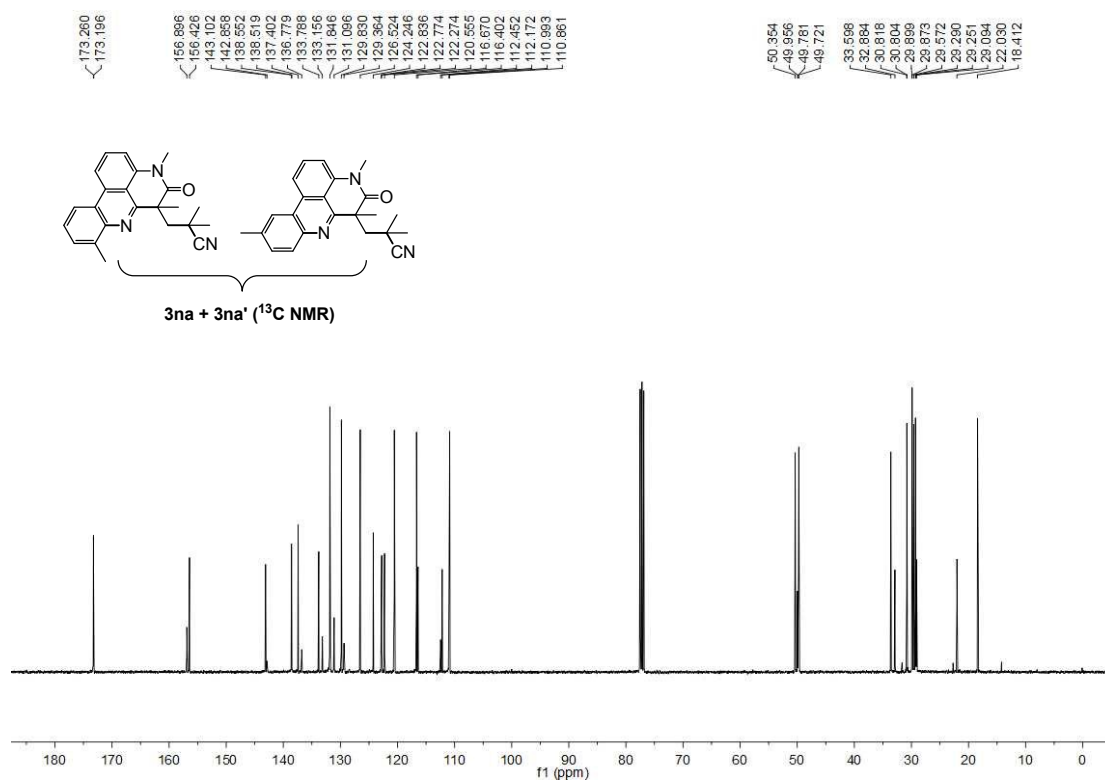



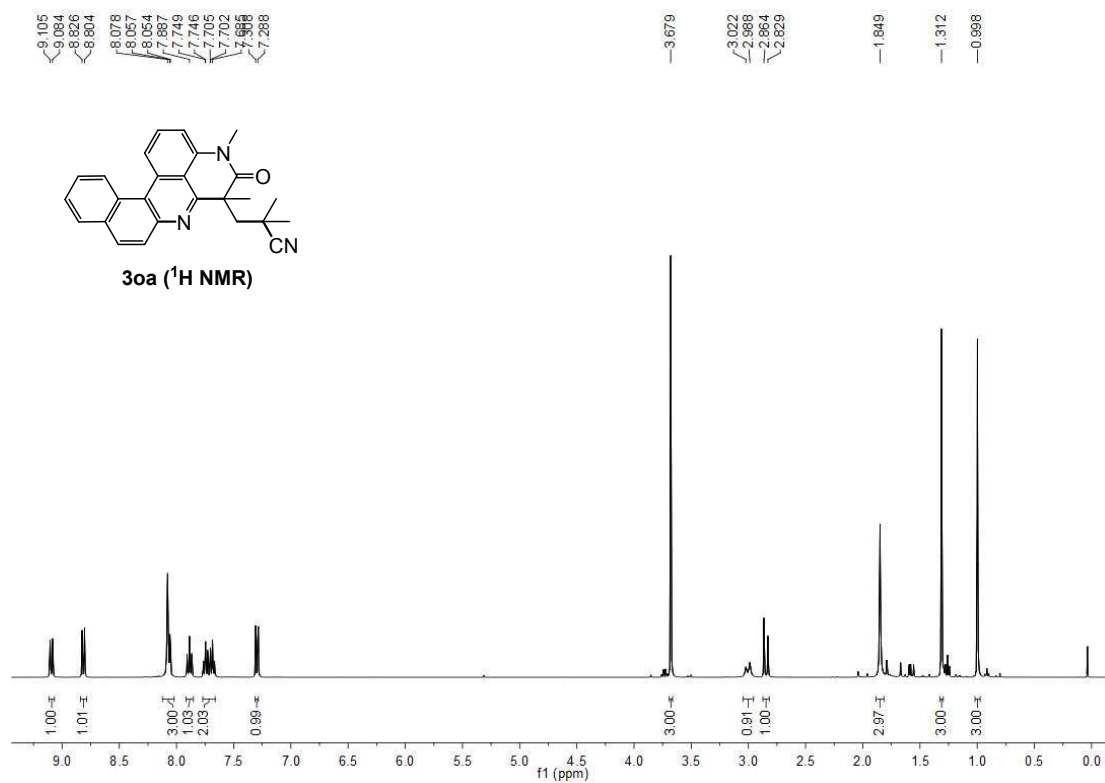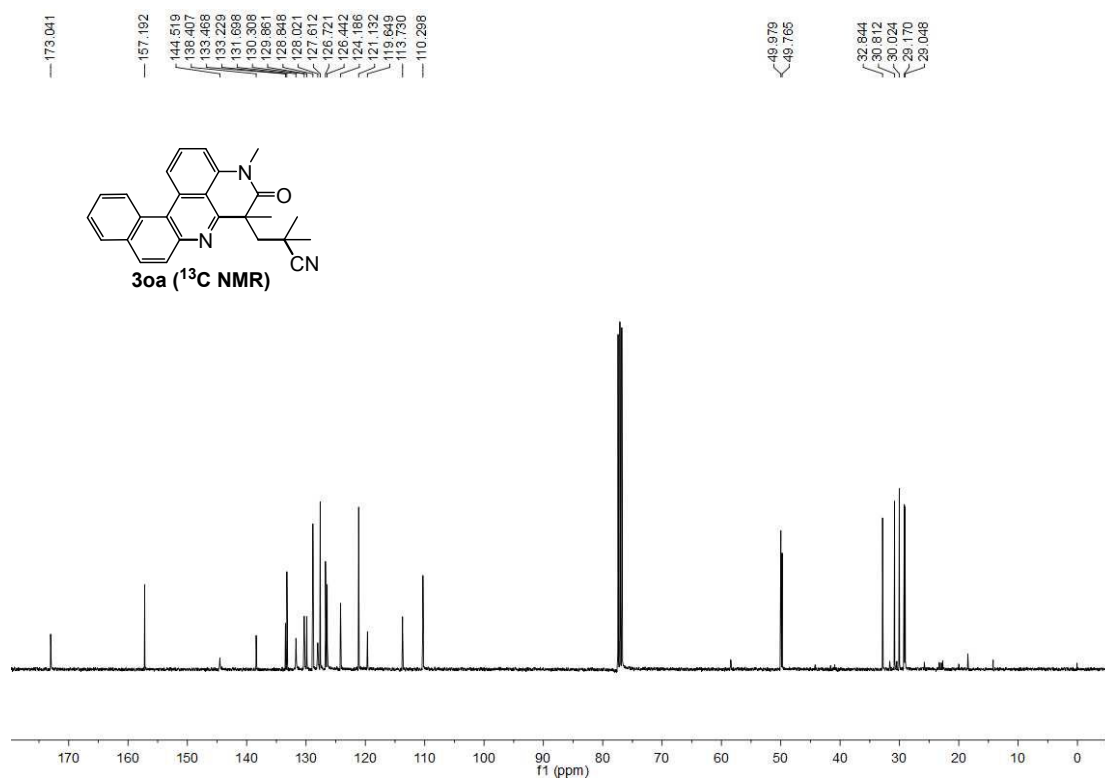

9.444  
9.424  
8.560  
8.528  
8.382  
8.371  
8.054  
8.031  
8.009  
7.896  
7.285  
7.280

3.674  
3.160  
3.126  
2.949  
2.915  
1.880  
1.344  
0.980

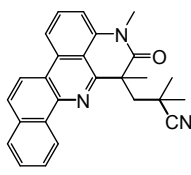

3pa (<sup>1</sup>H NMR)

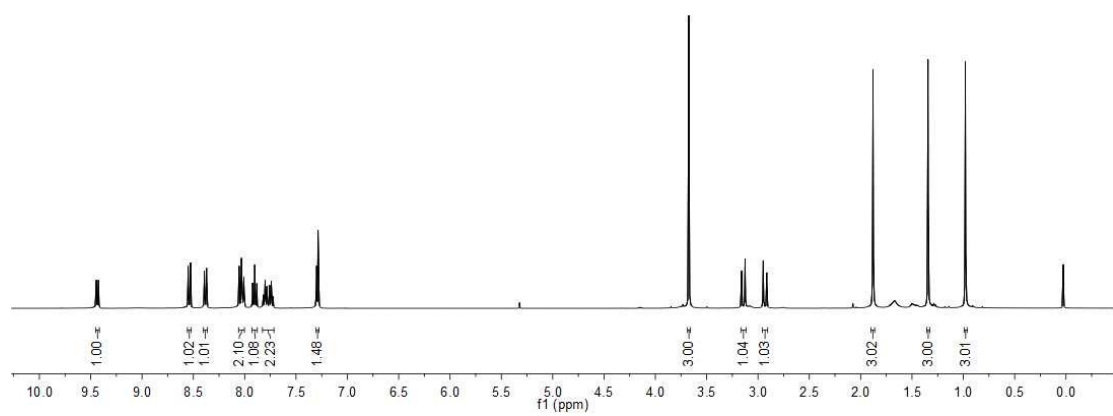

173.183  
156.726  
141.598  
138.638  
133.685  
133.561  
131.967  
131.581  
127.732  
127.694  
120.960  
124.809  
124.103  
119.838  
118.703  
113.075  
110.440

50.318  
50.308  
33.547  
30.871  
29.868  
29.504  
29.265

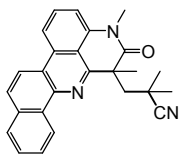

3pa (<sup>13</sup>C NMR)

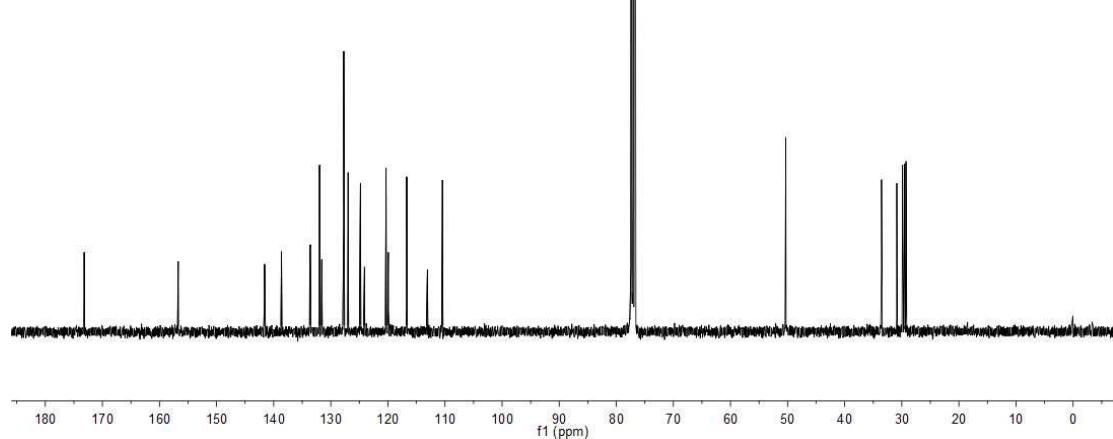

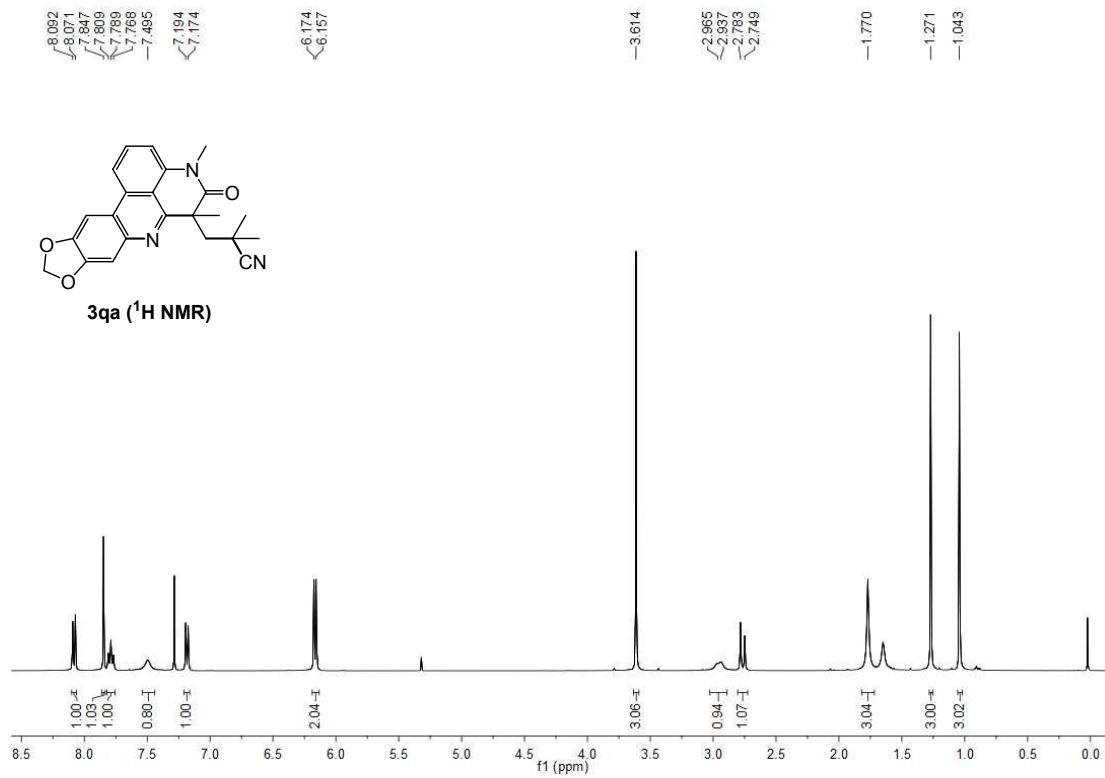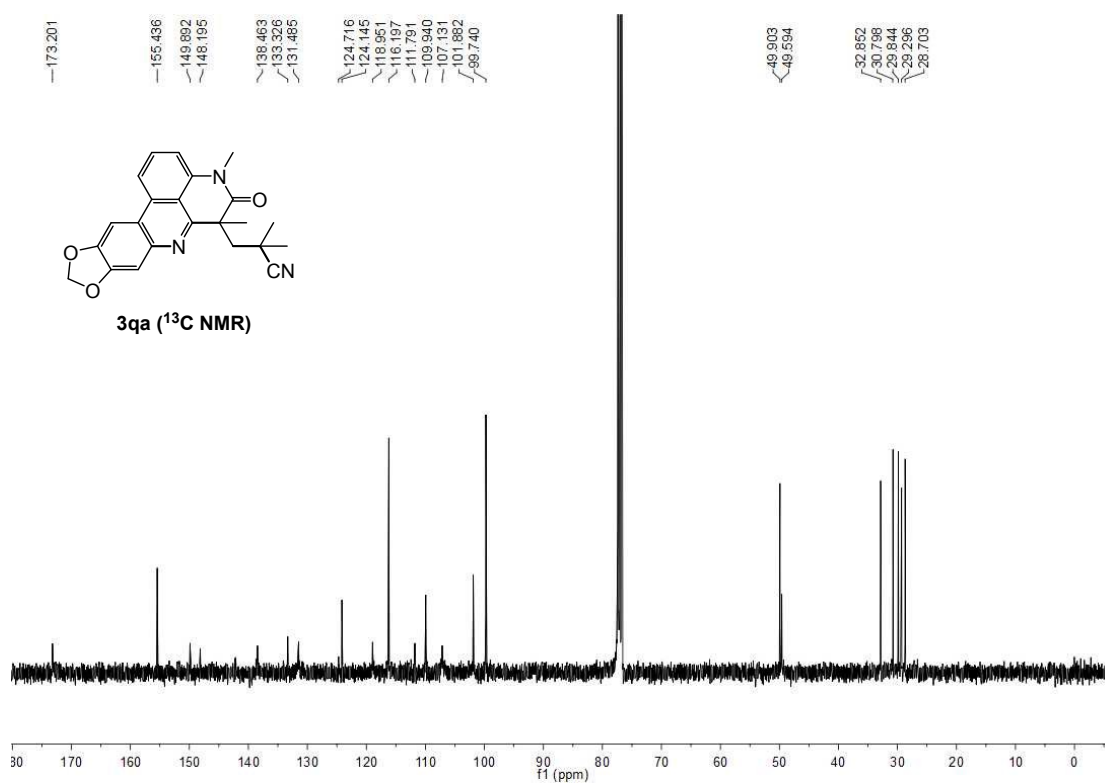

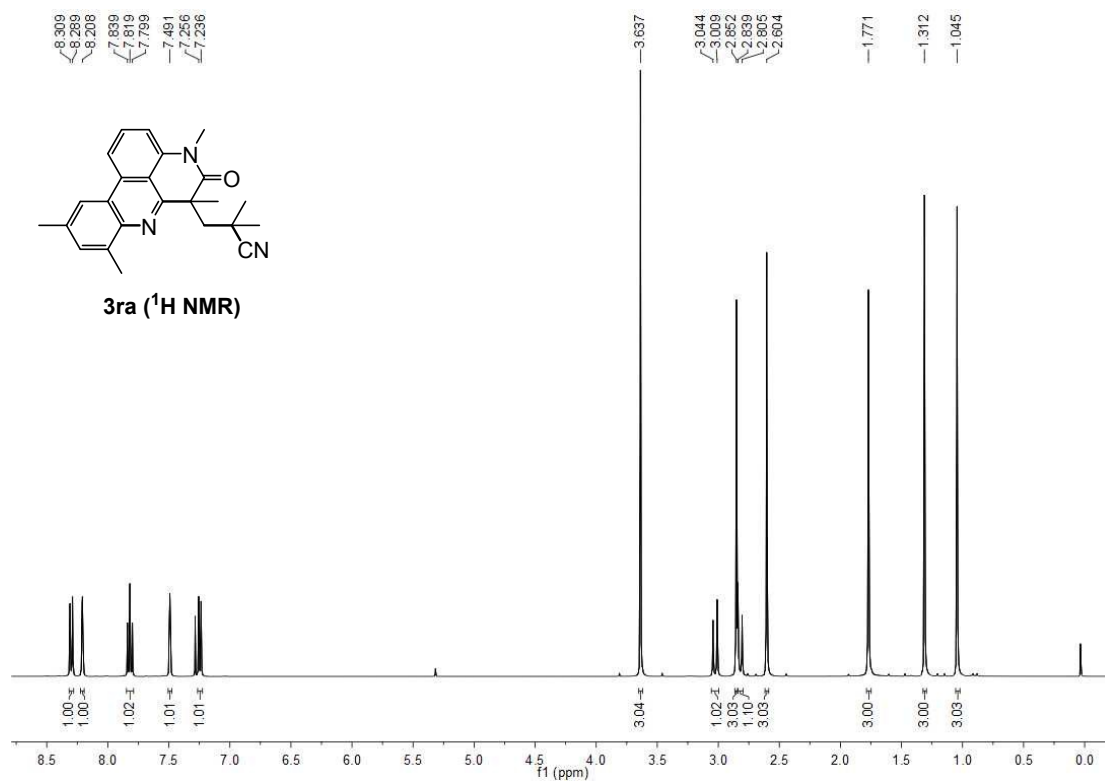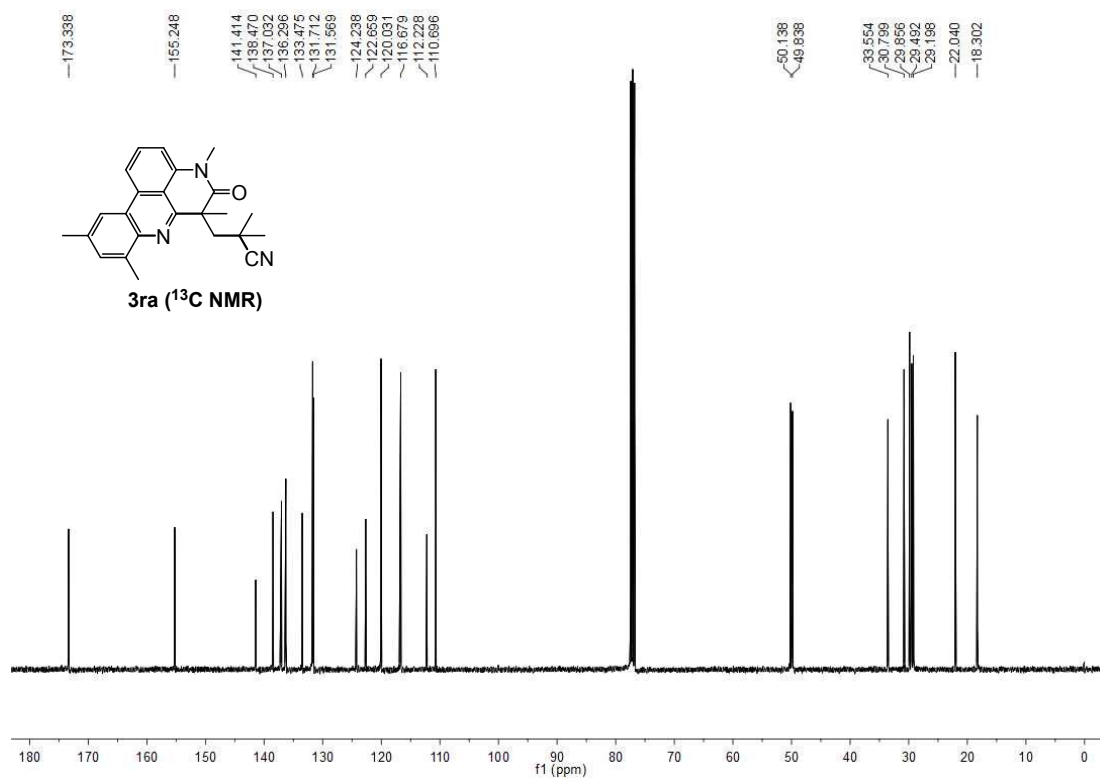

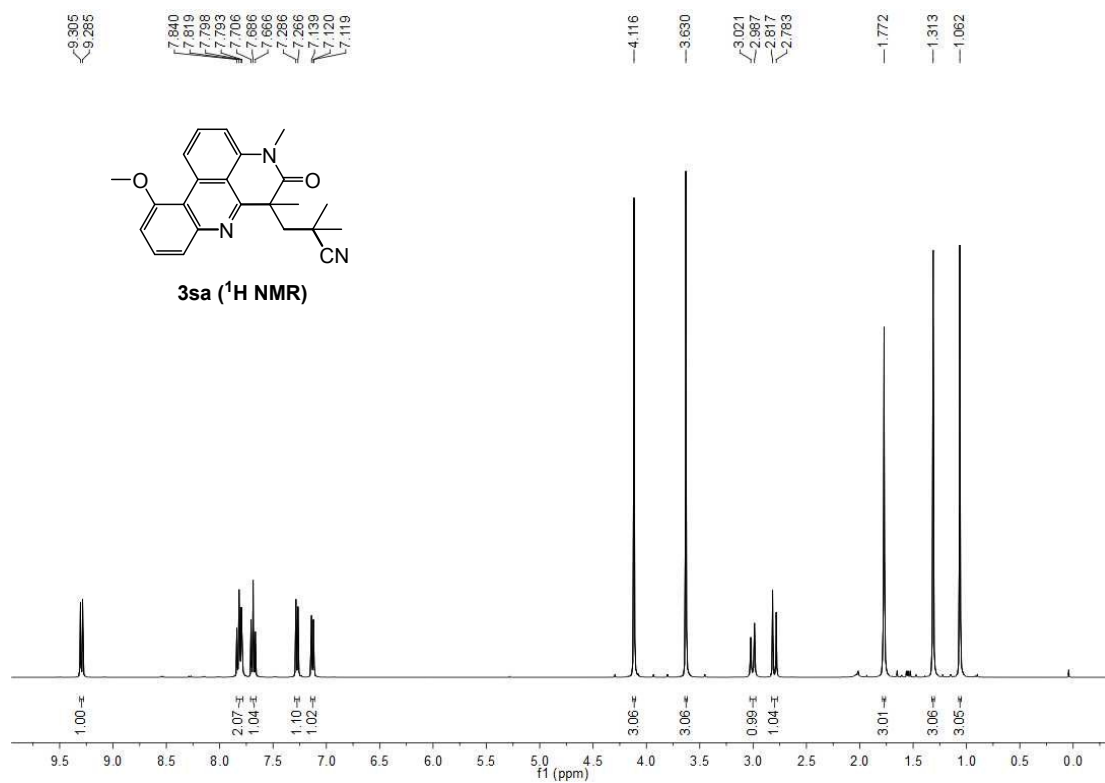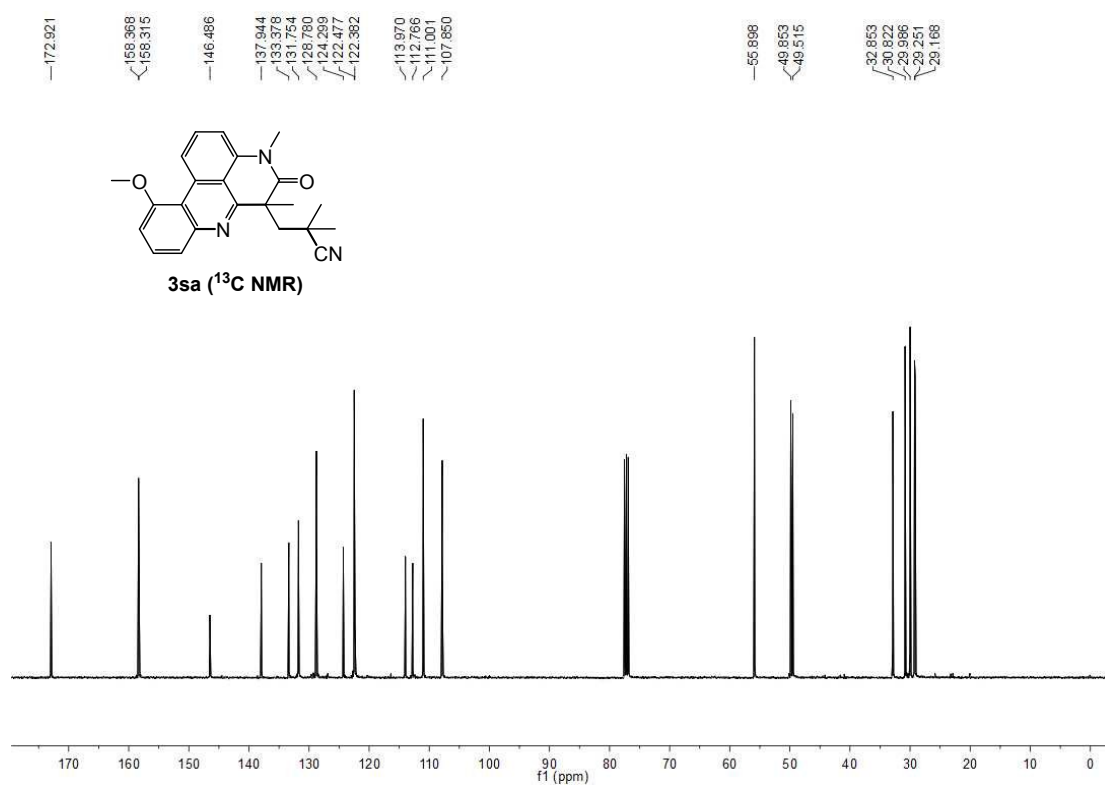

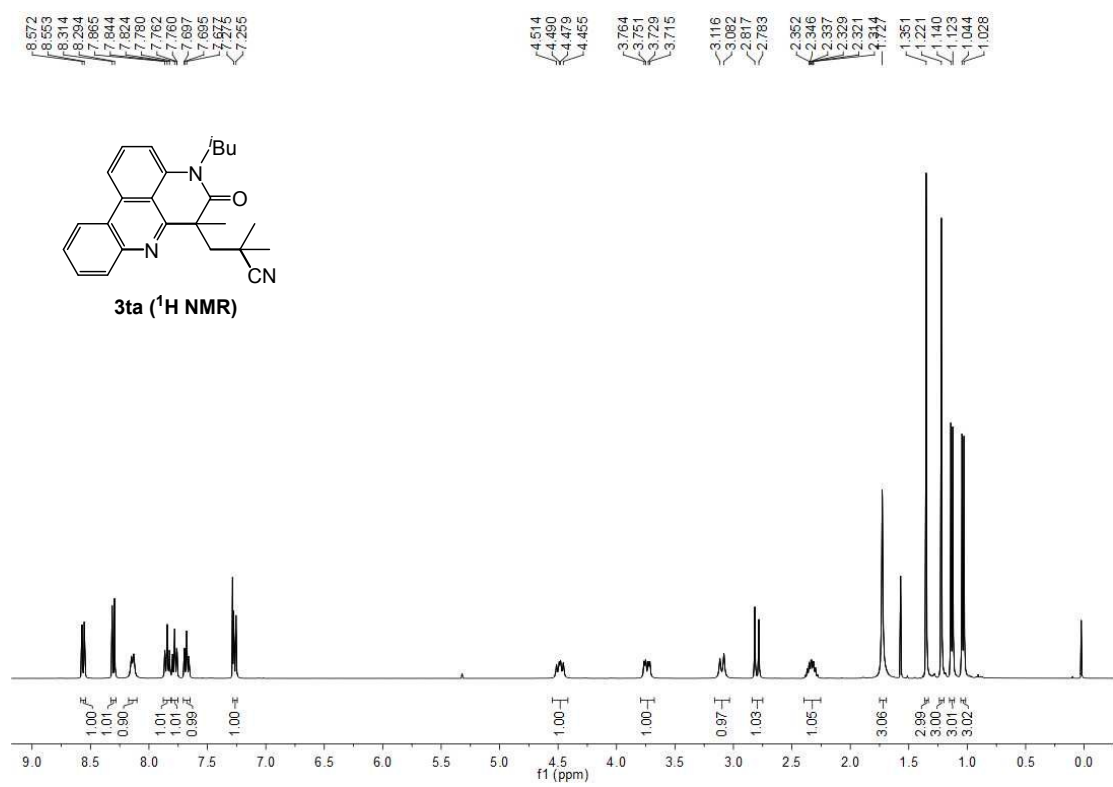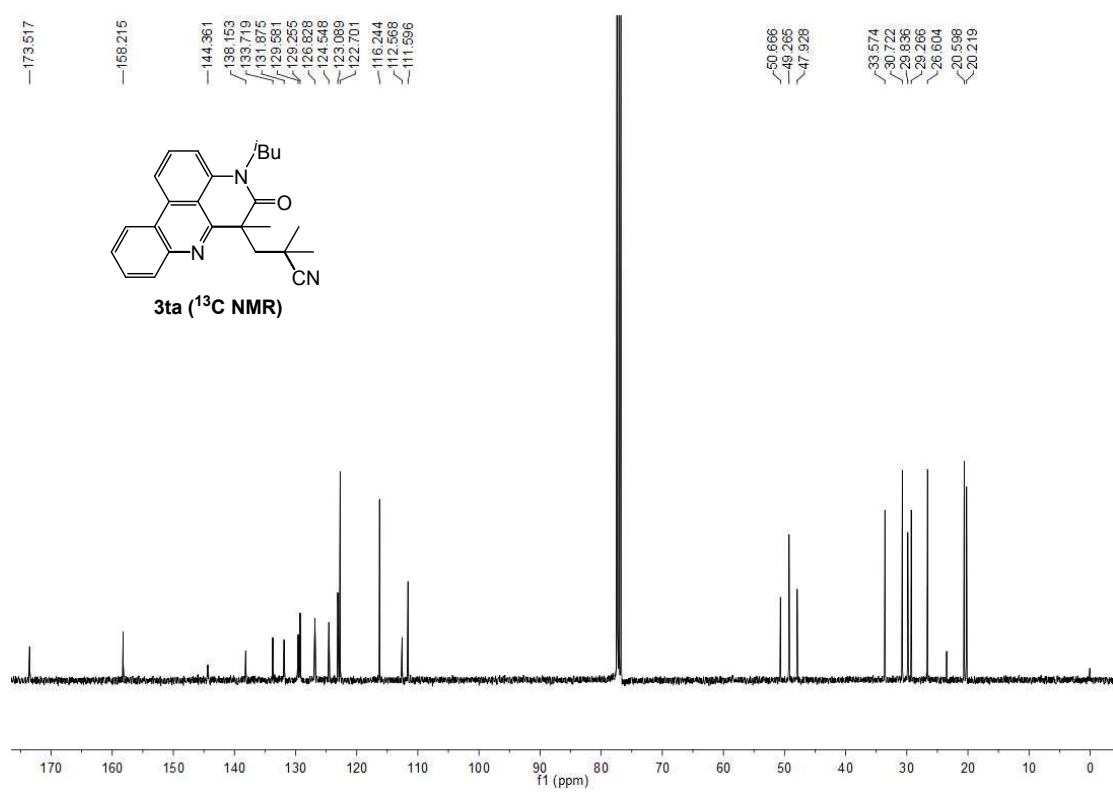

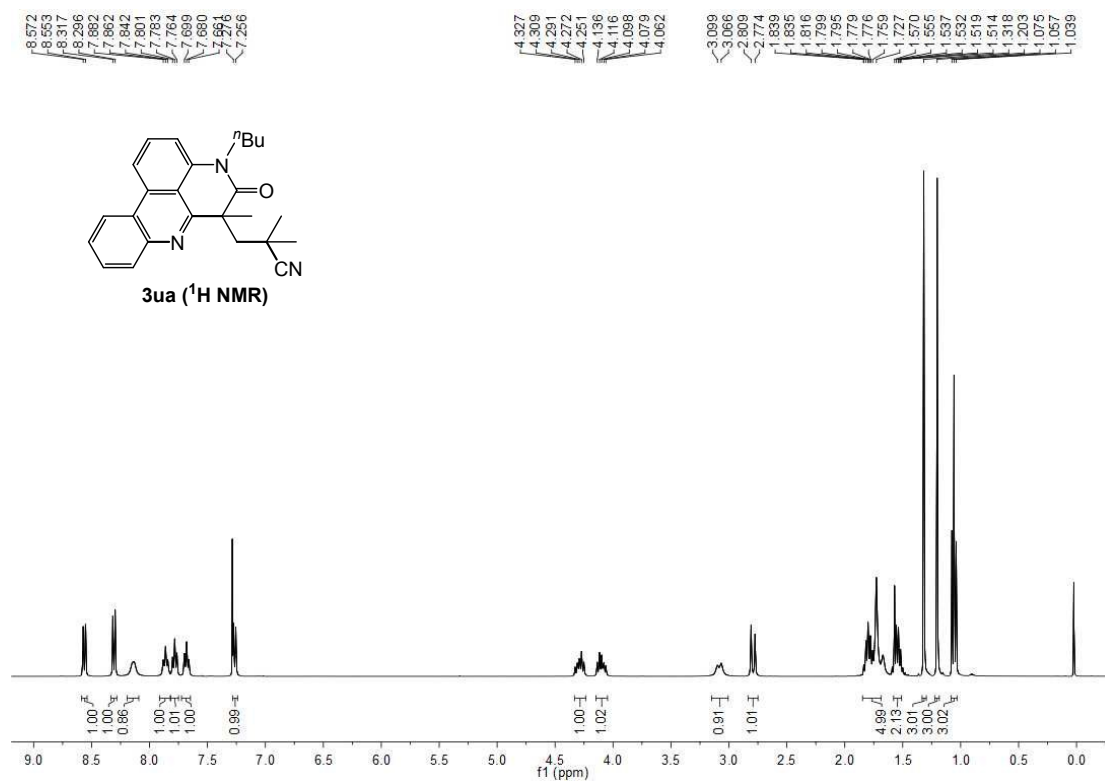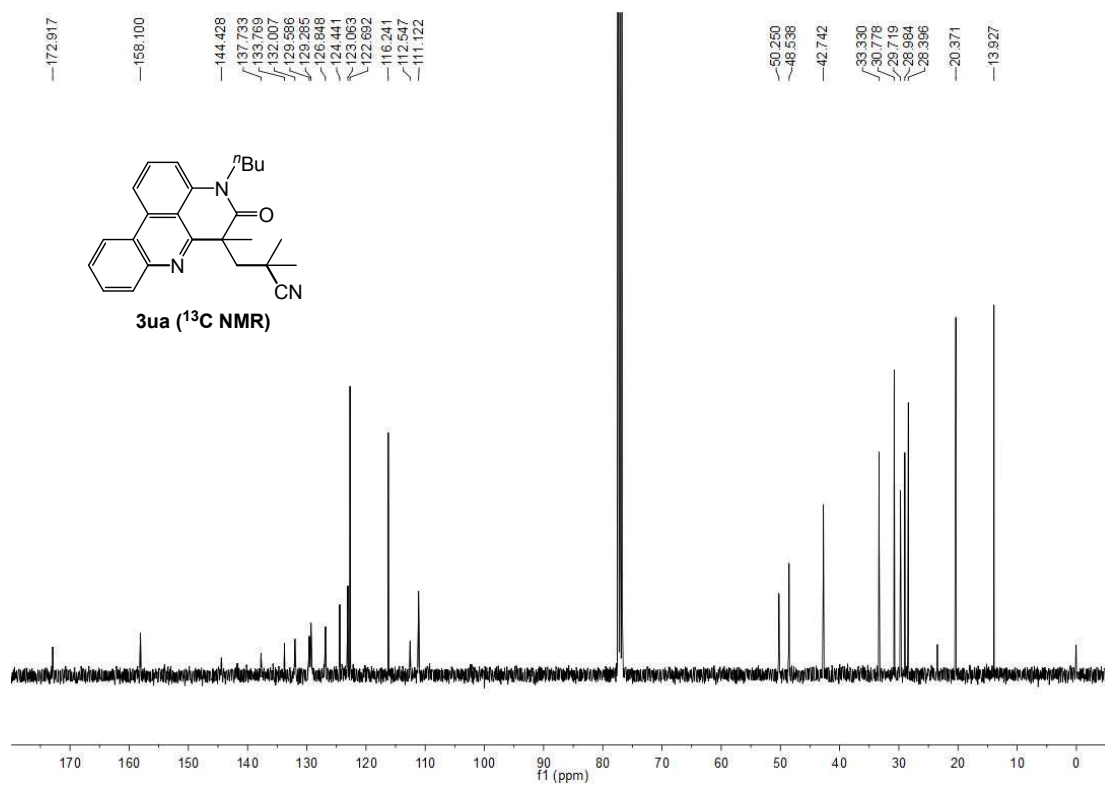

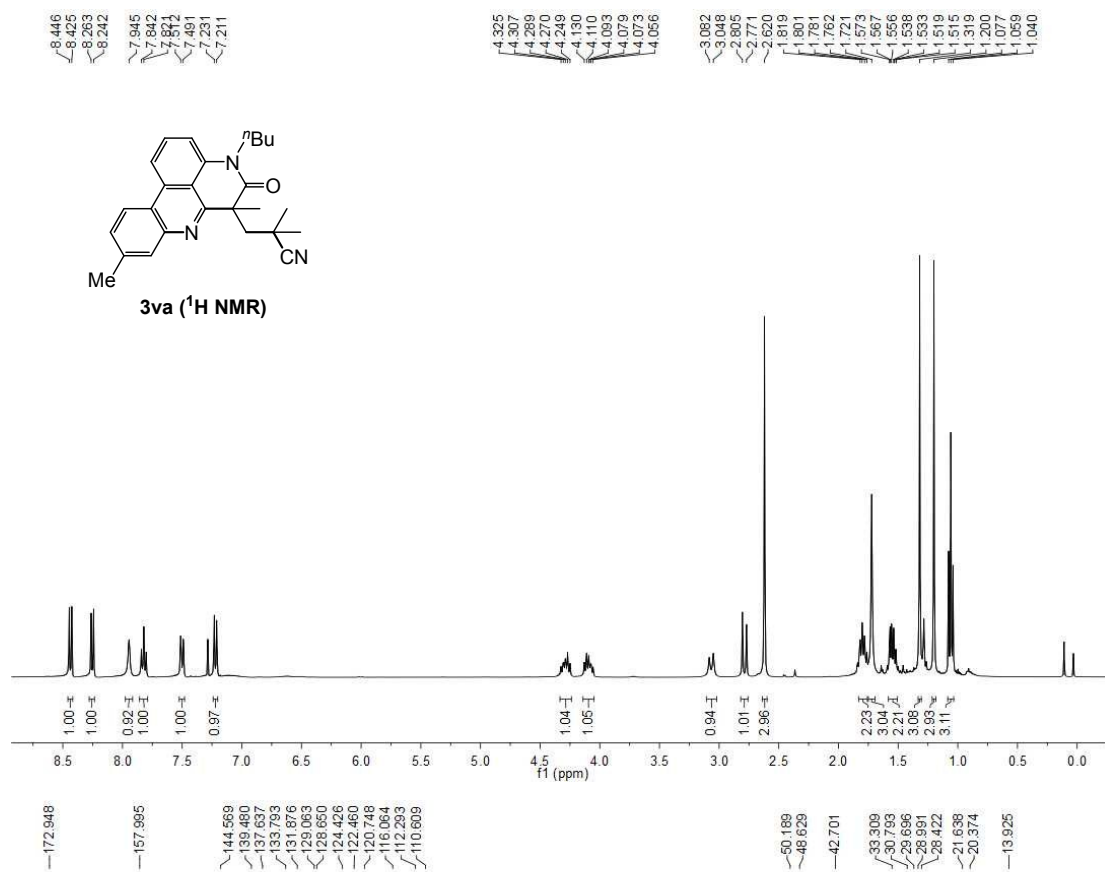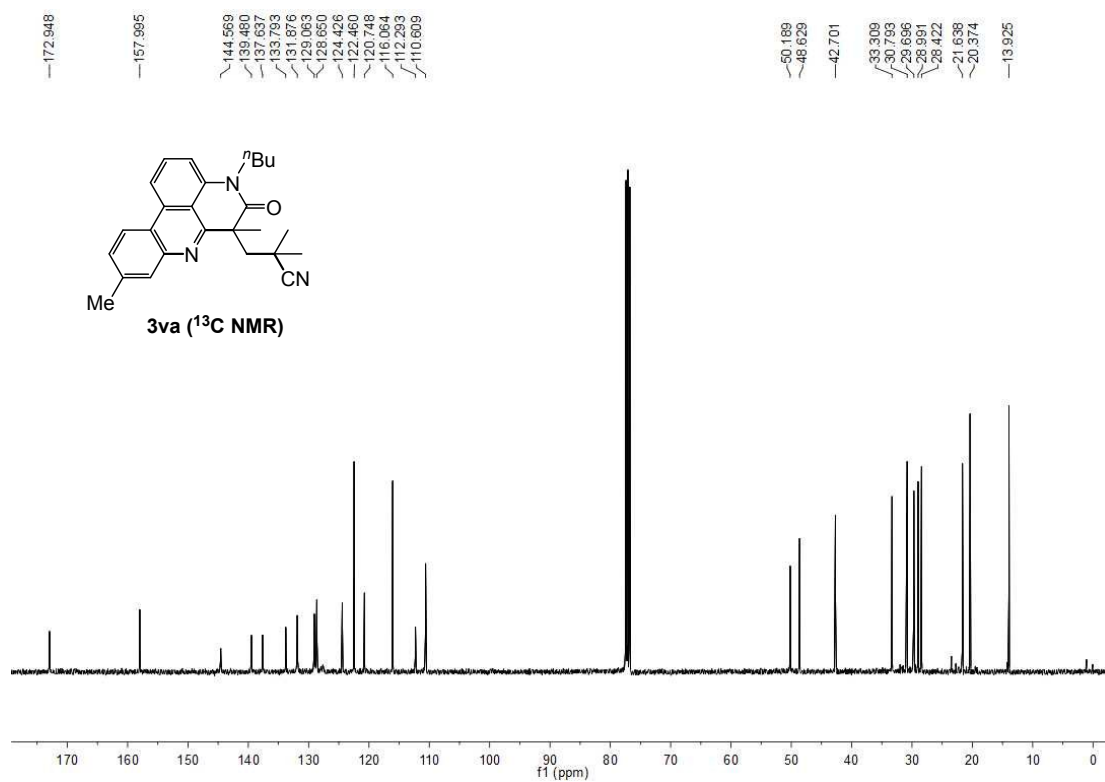



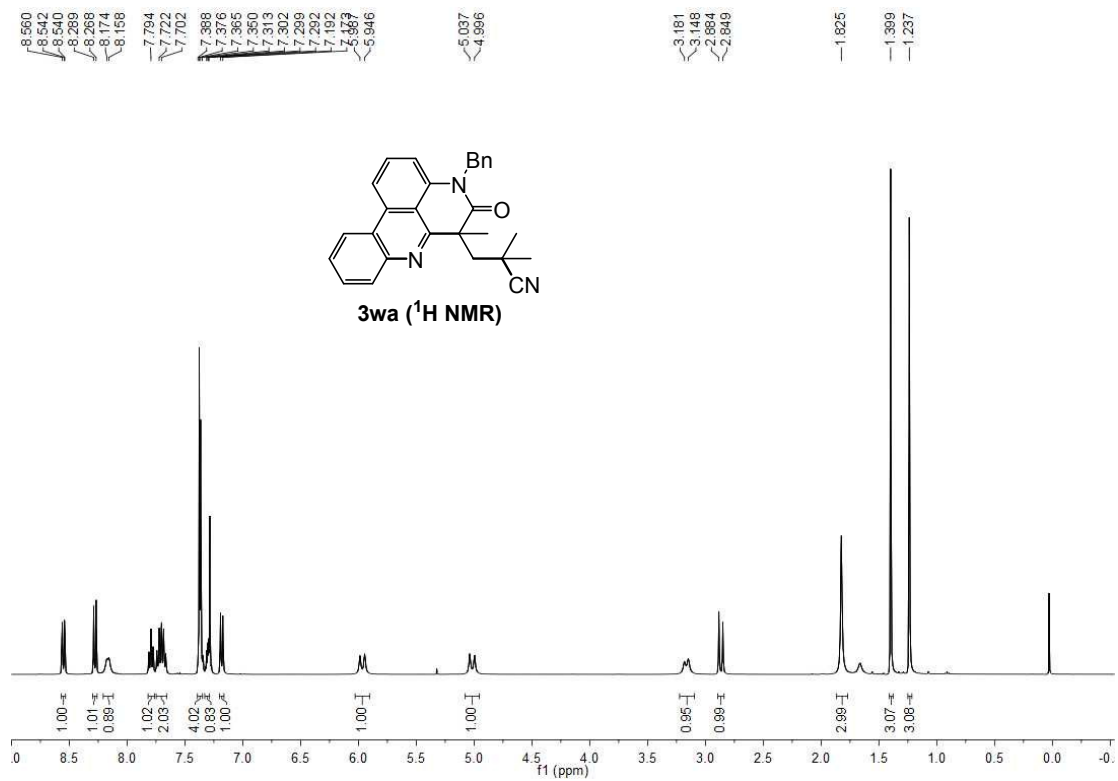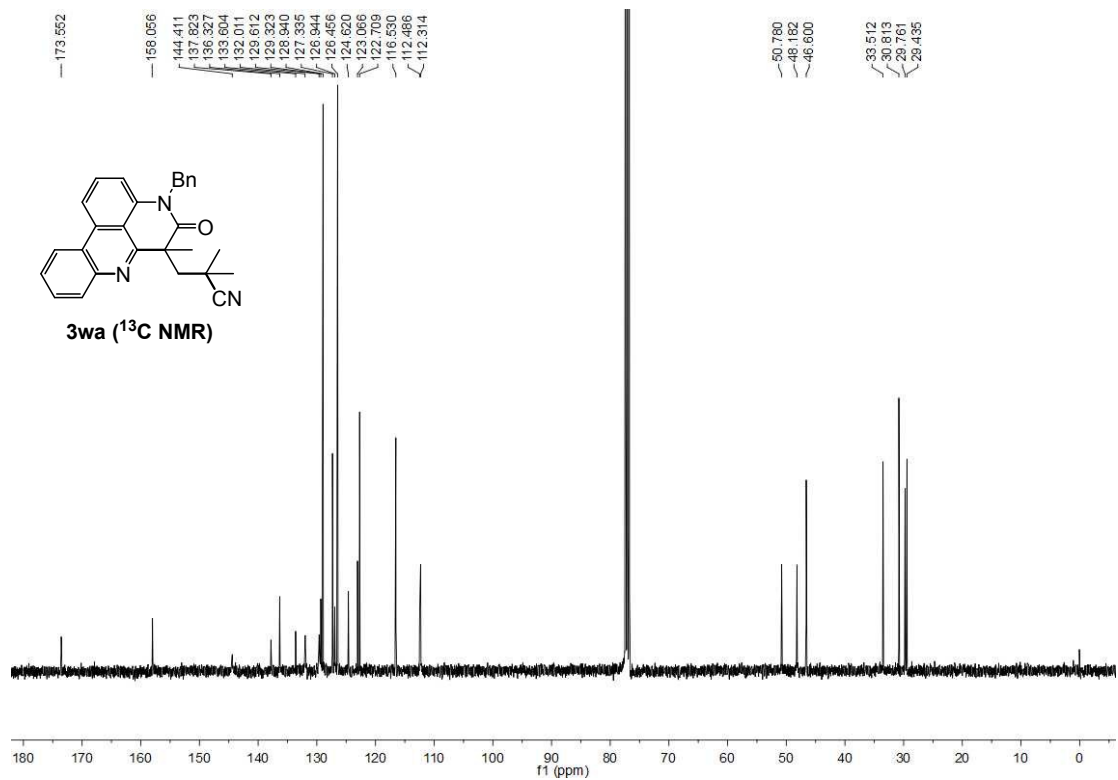

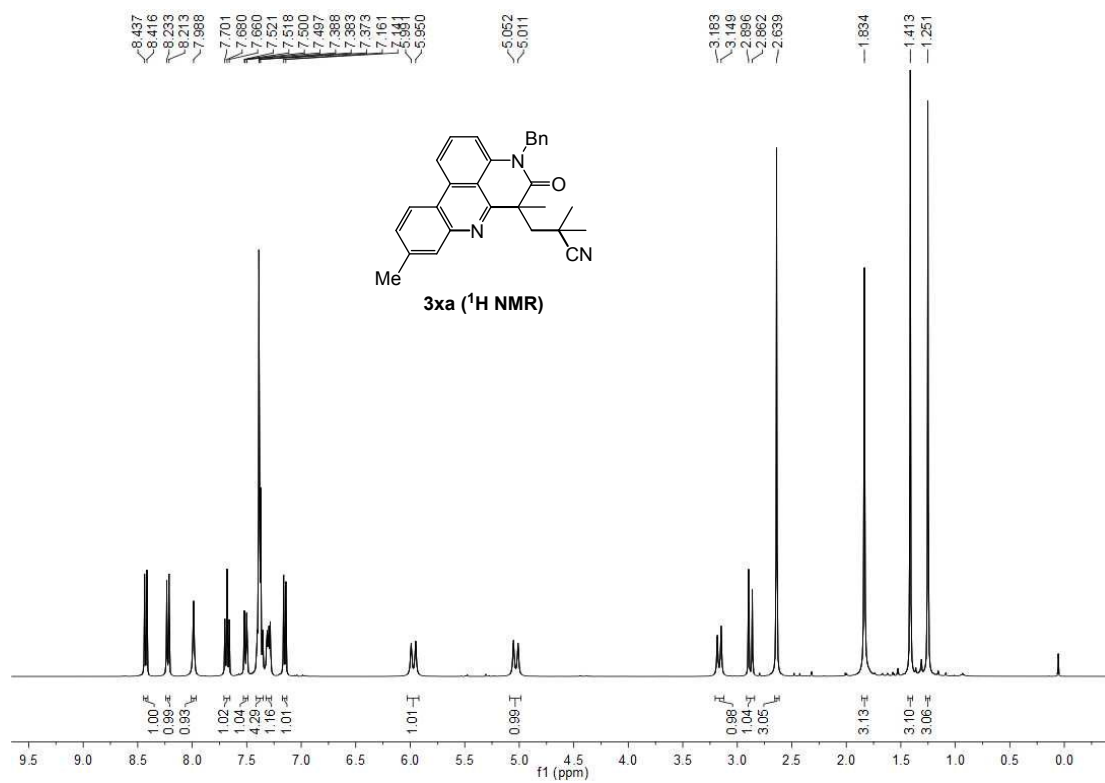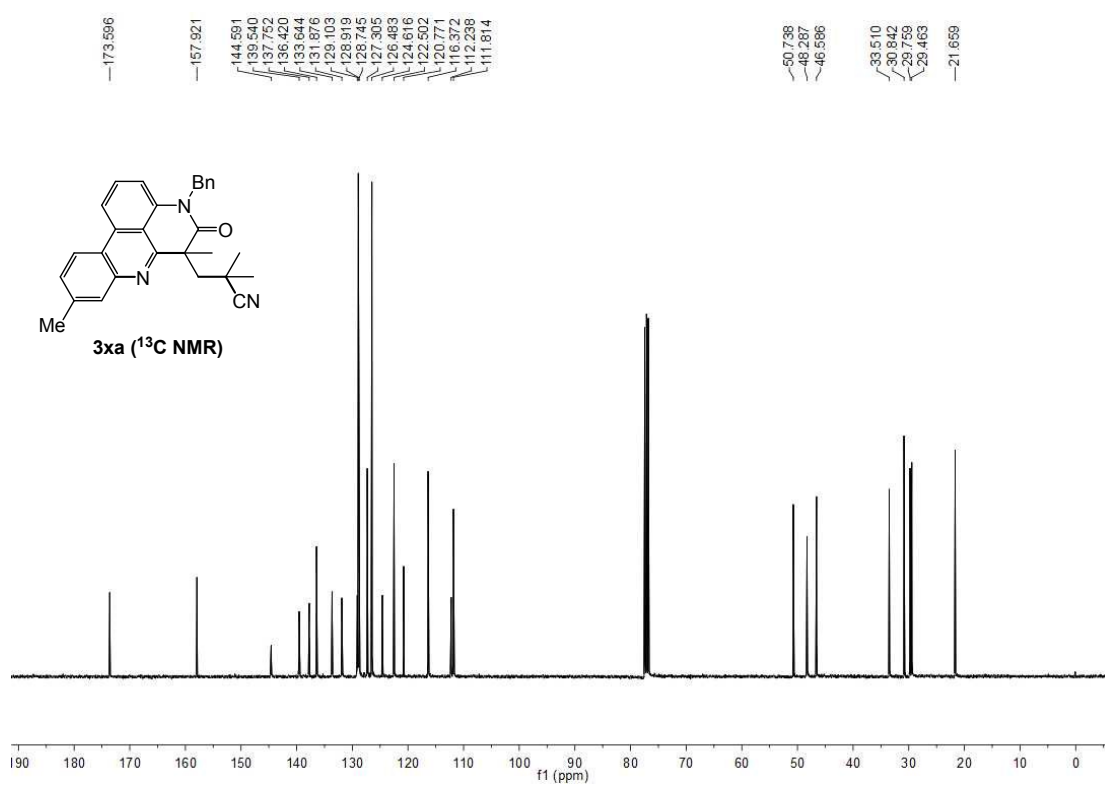

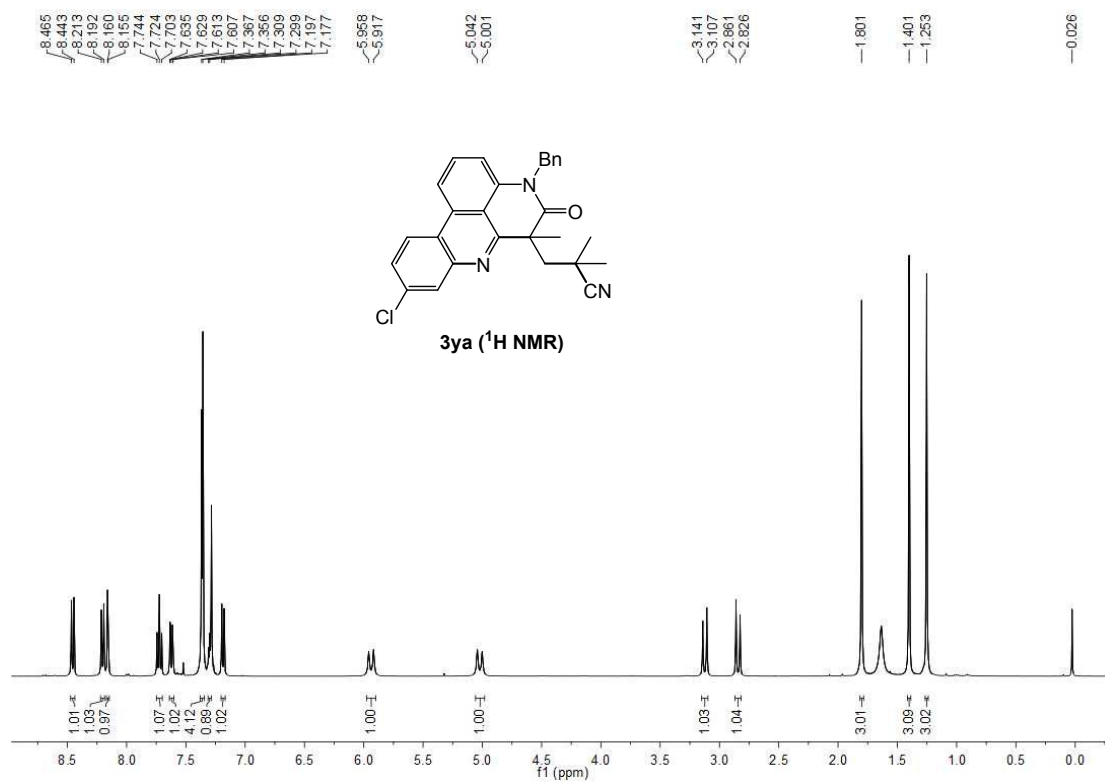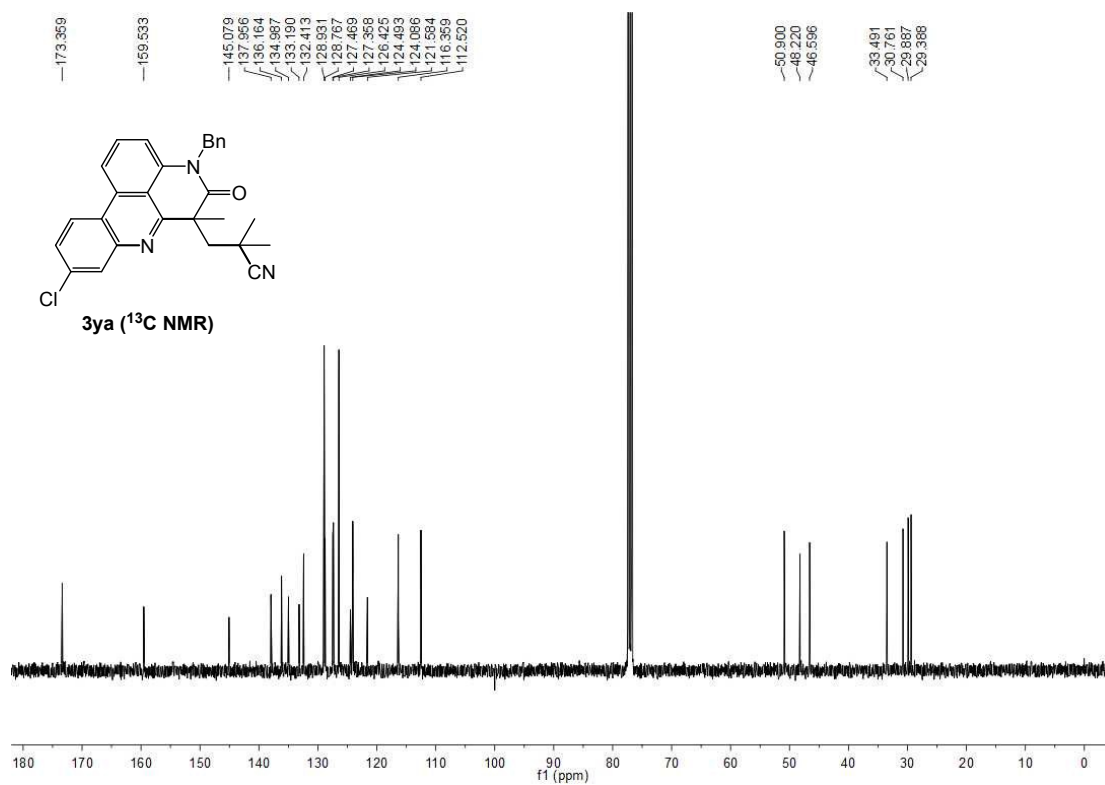

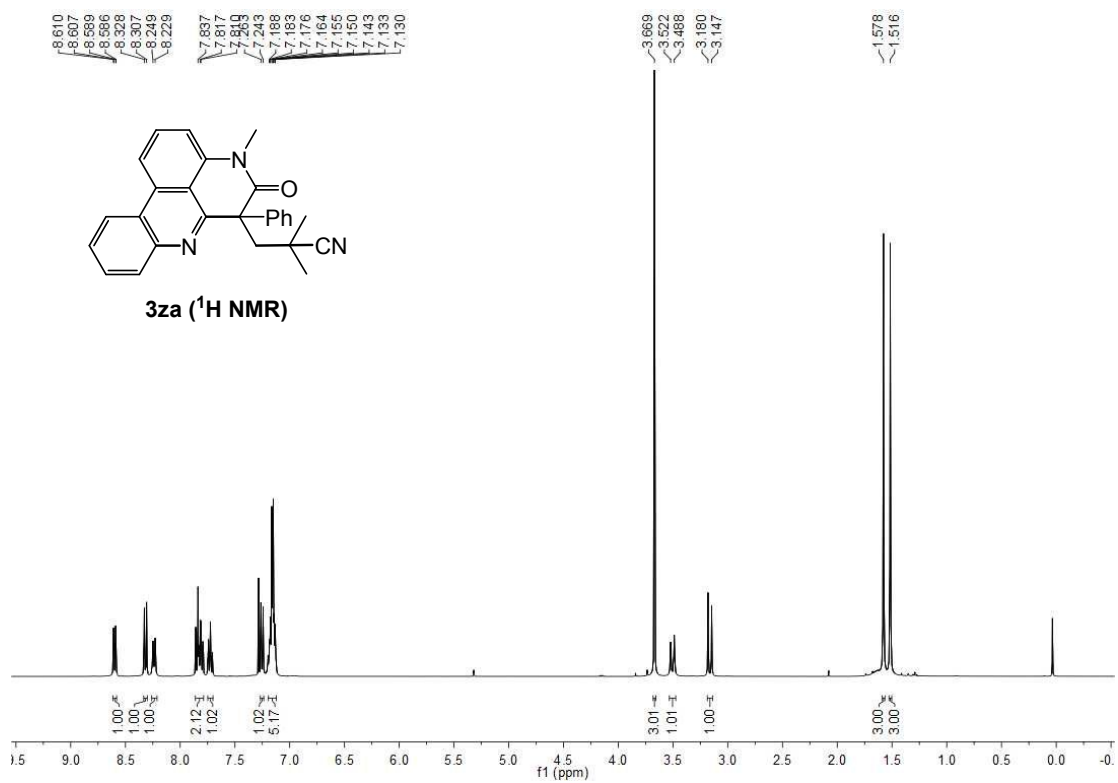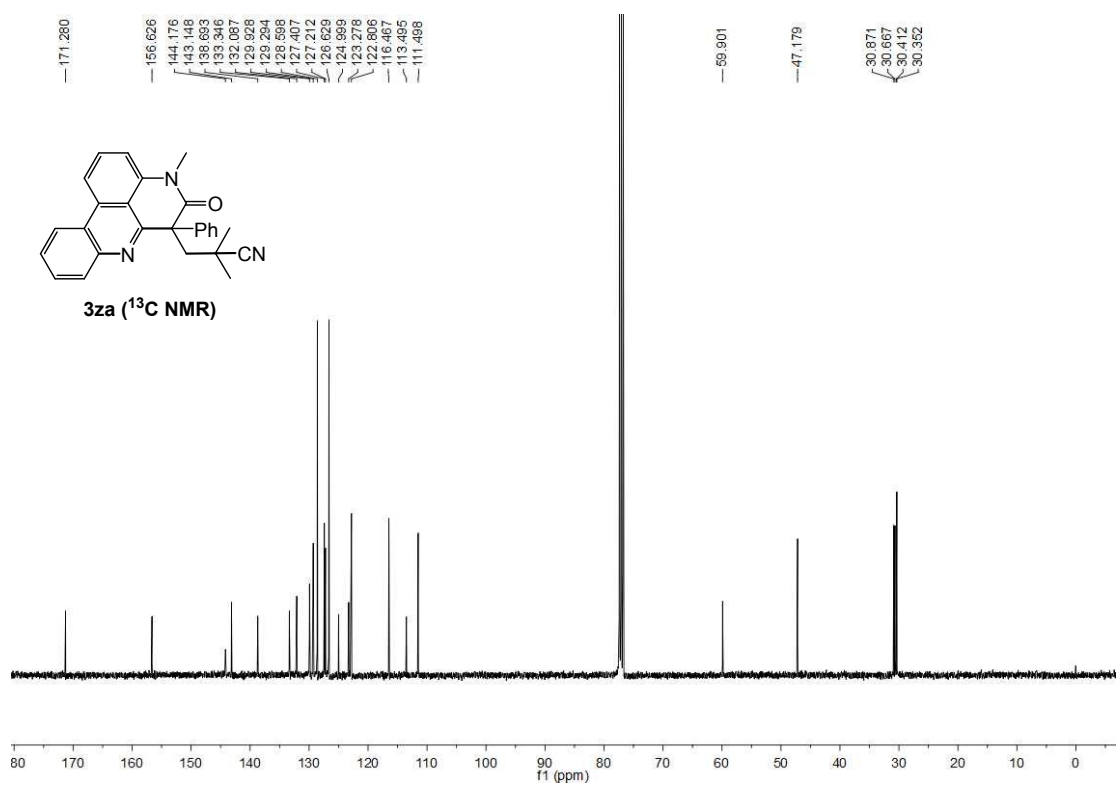

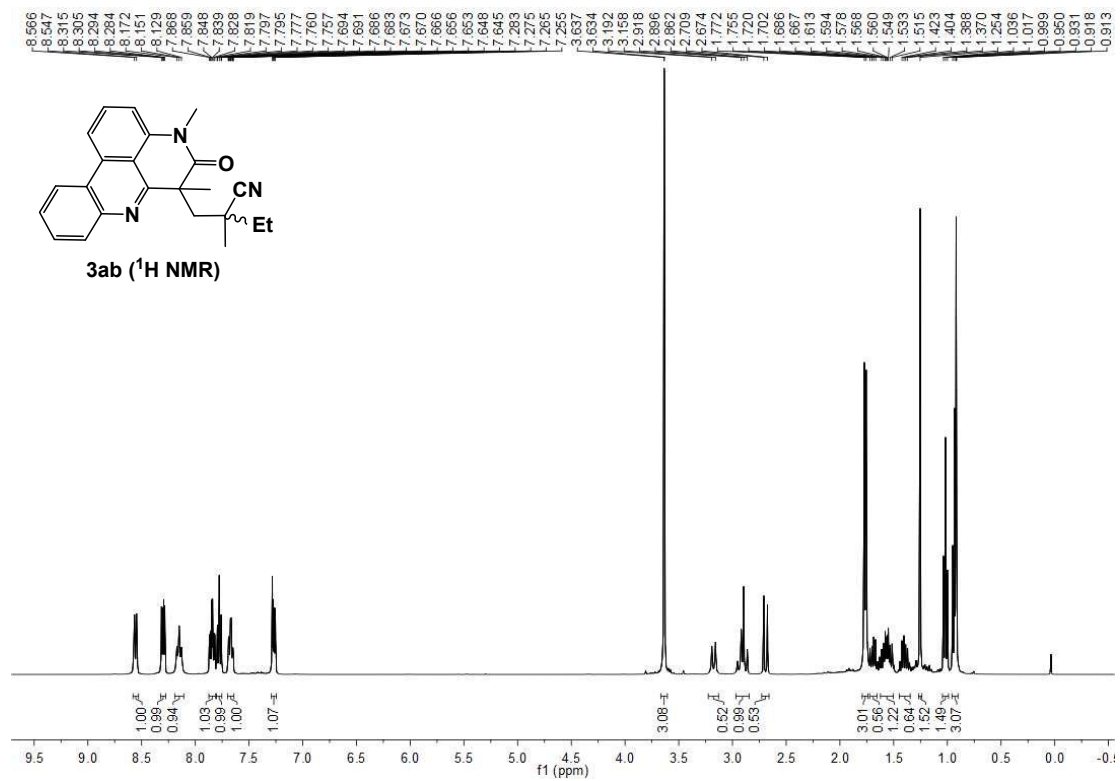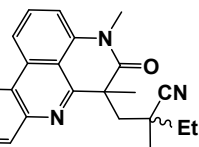

3ab ( $^1\text{H}$  NMR)

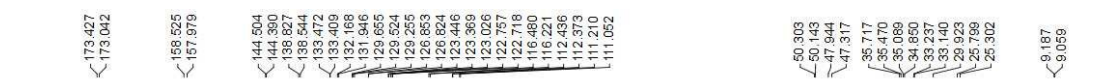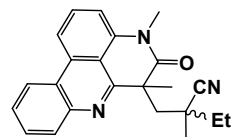

3ab ( $^{13}\text{C}$  NMR)

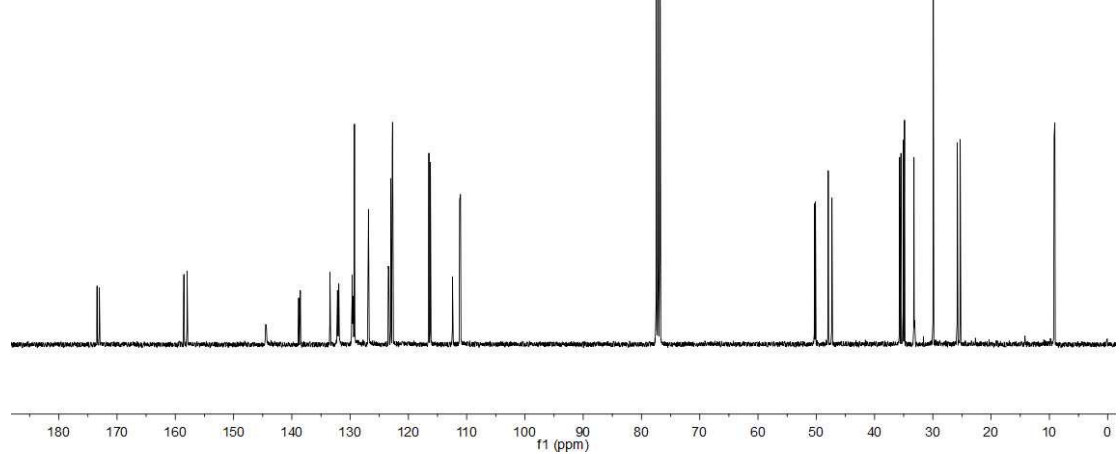

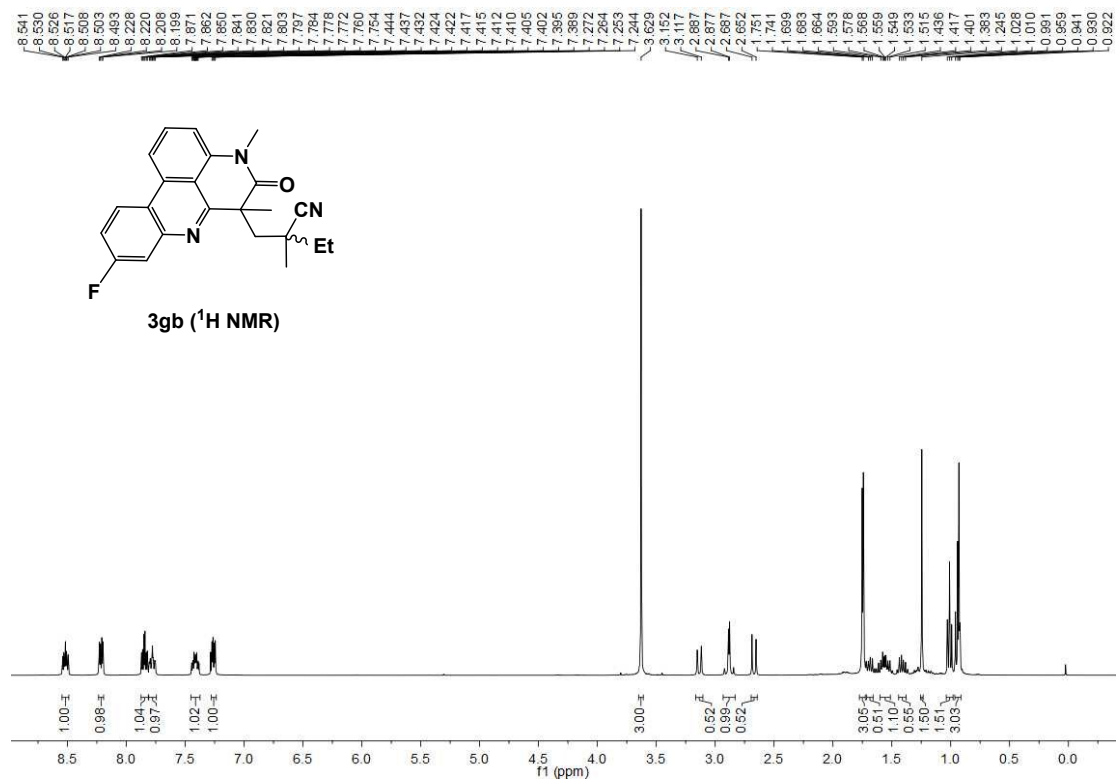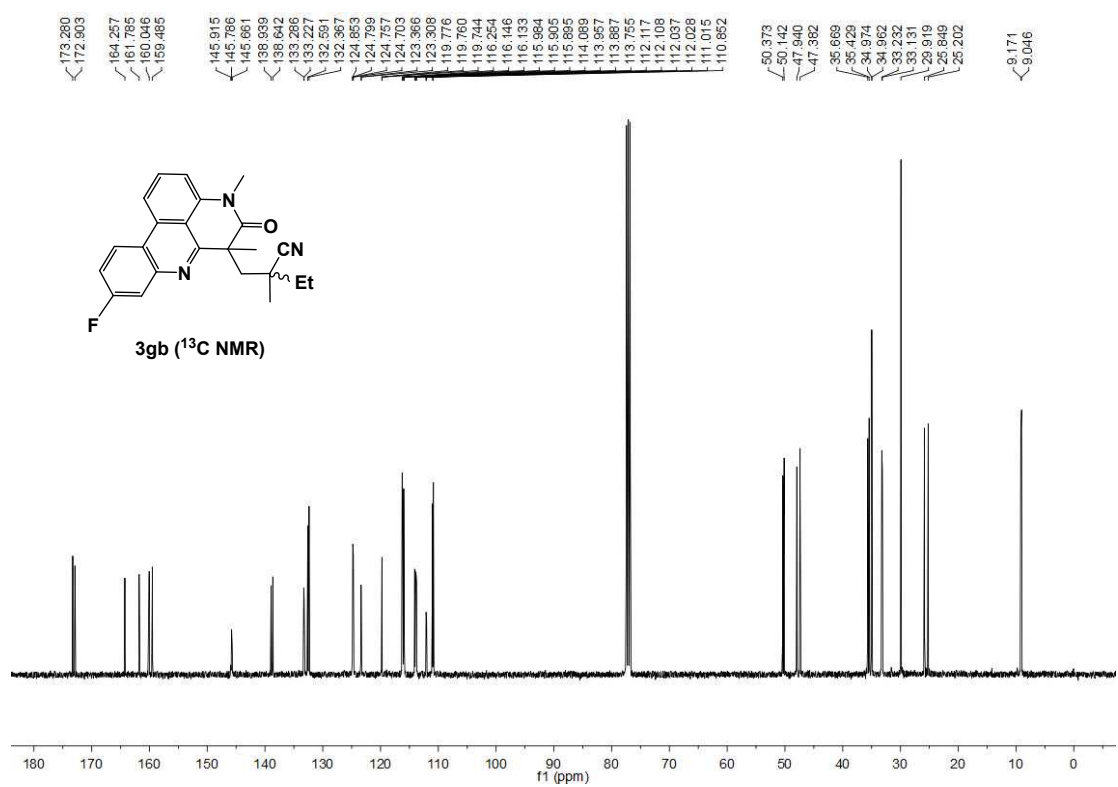

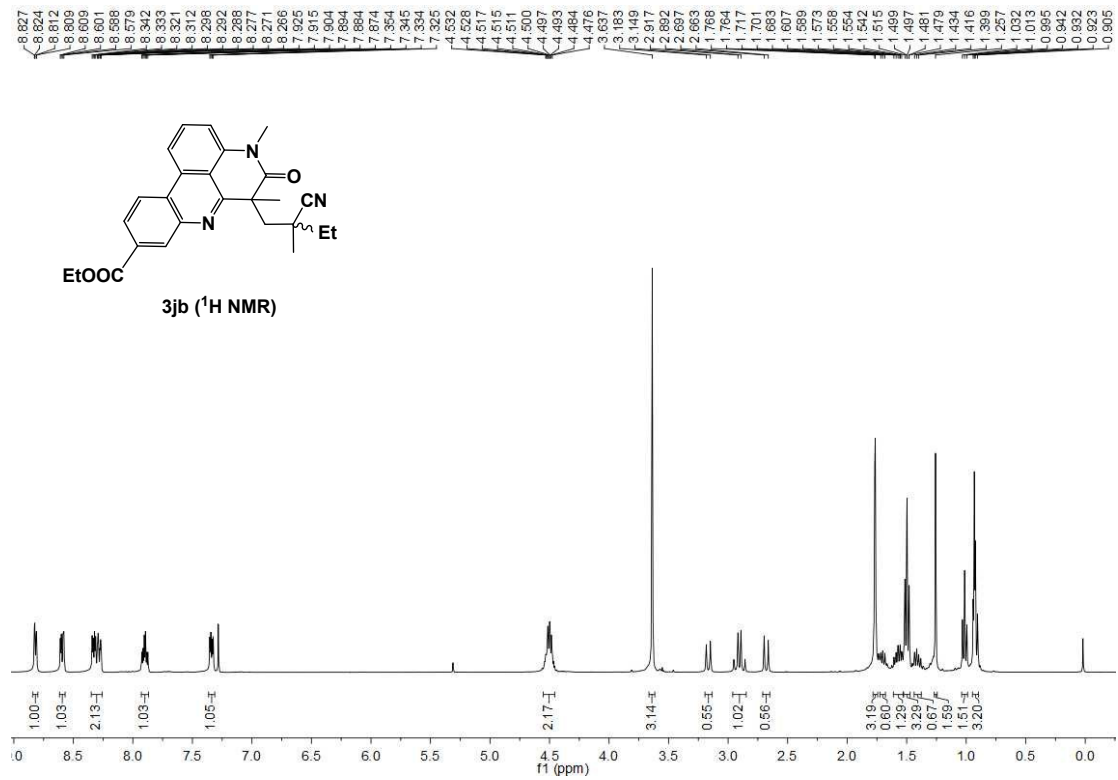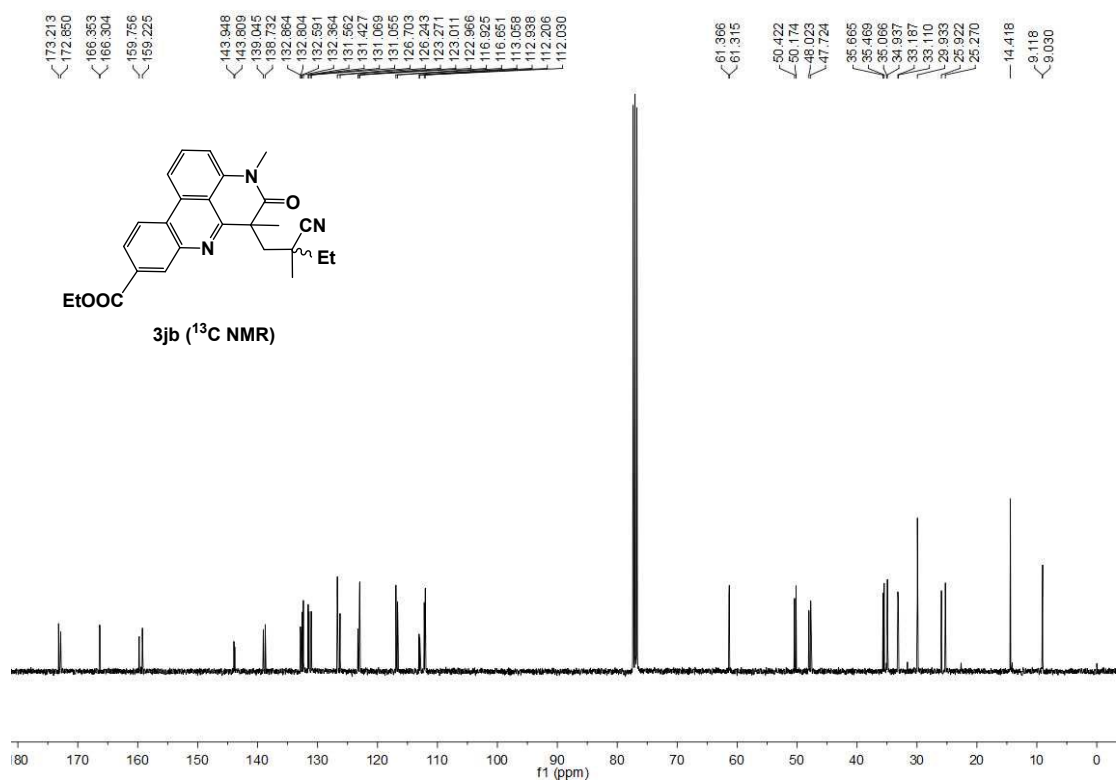

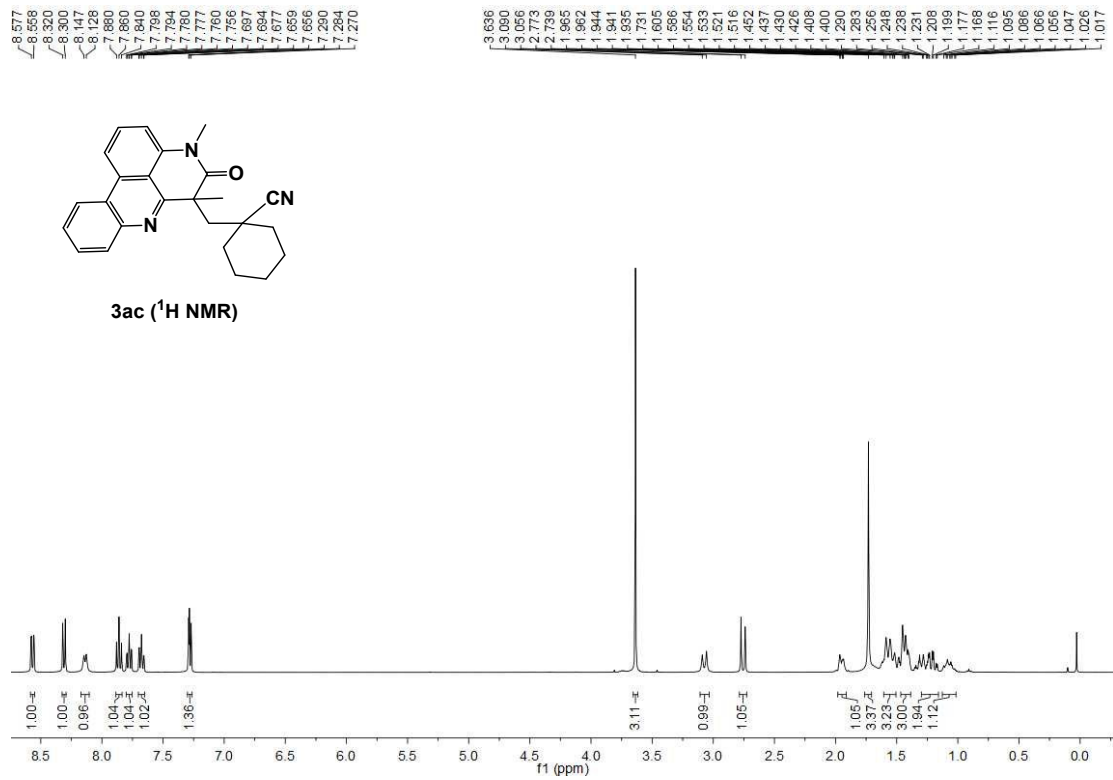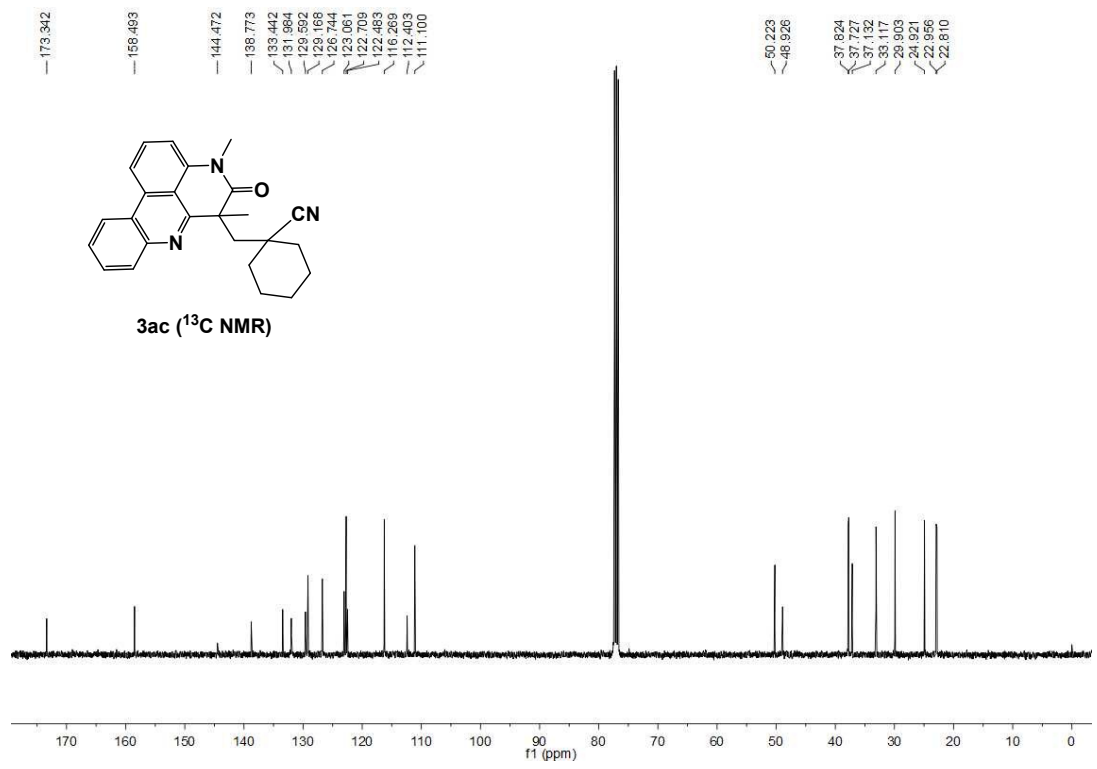



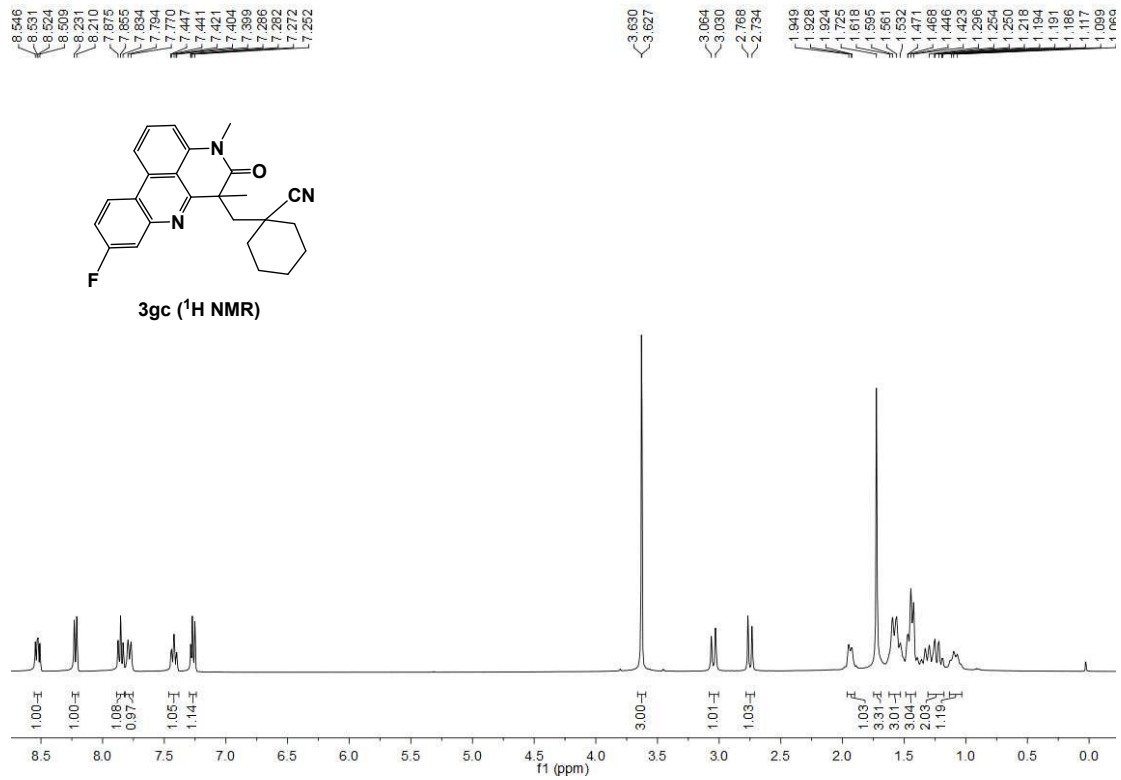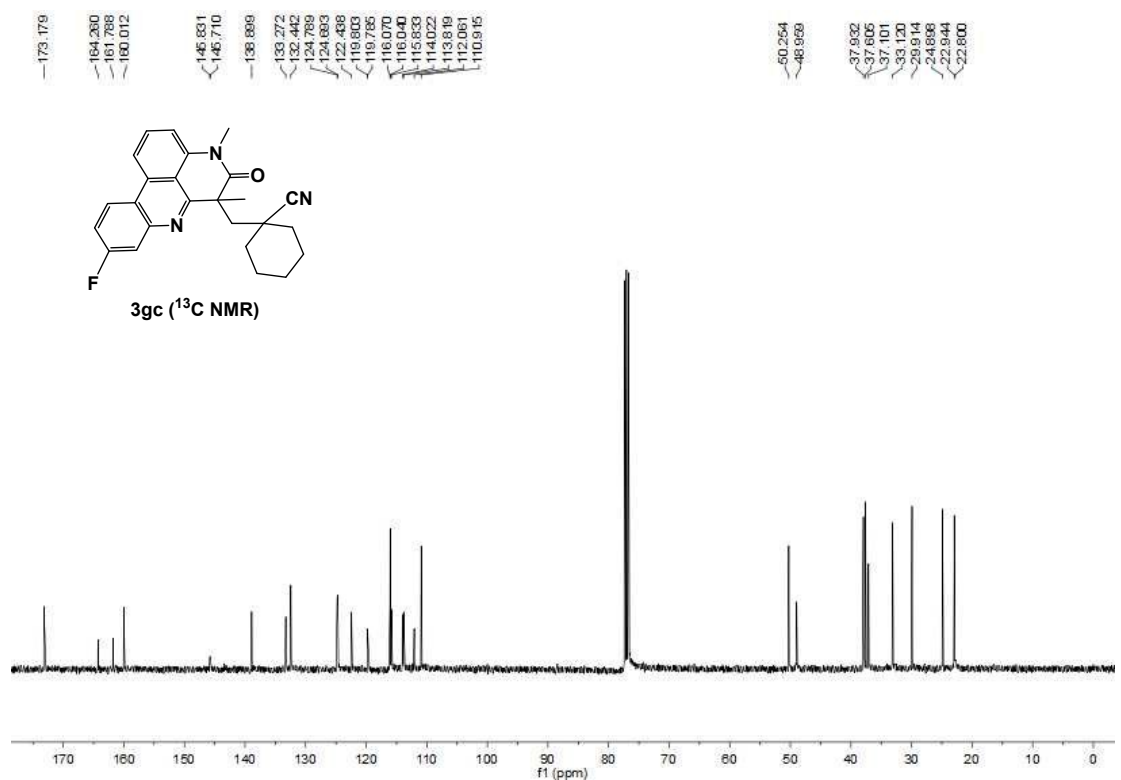

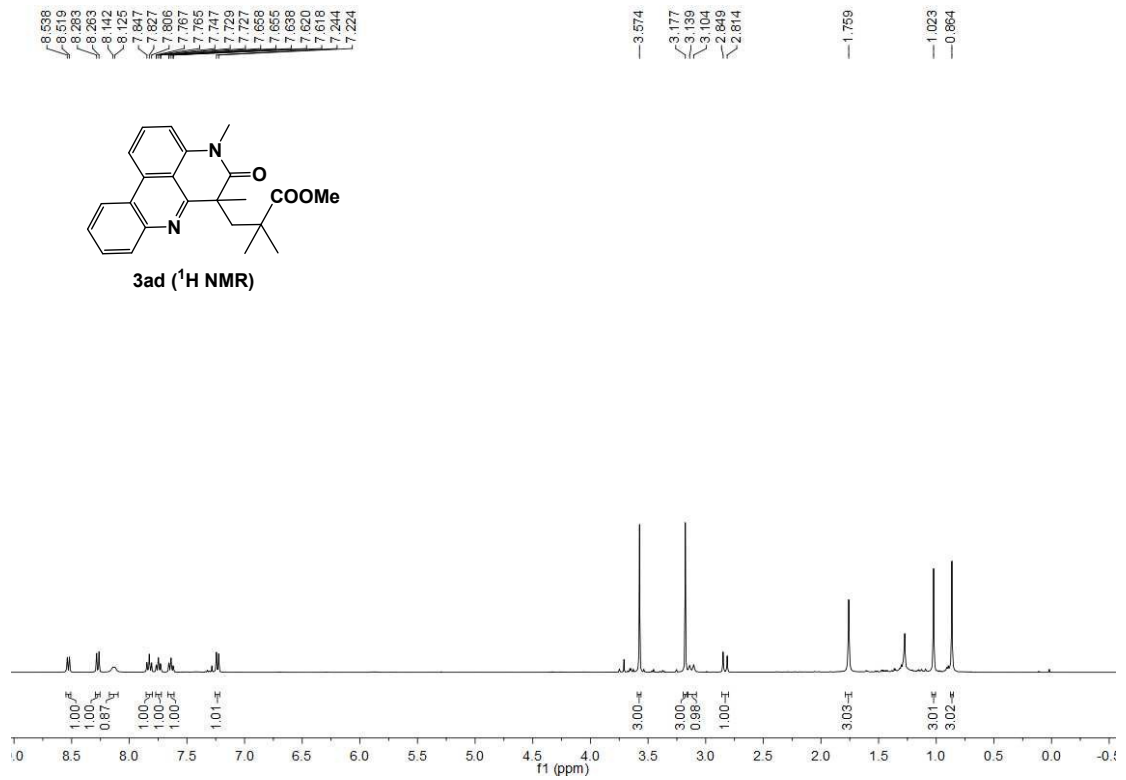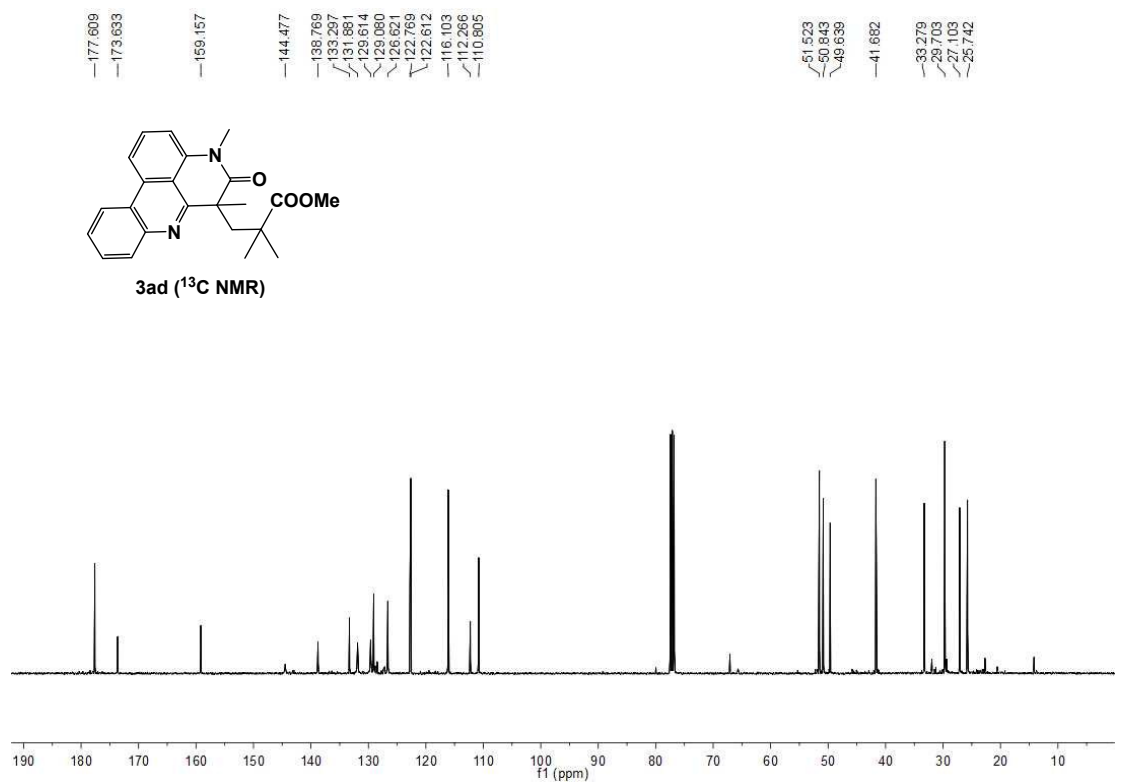

8.404  
8.383  
8.223  
8.203  
7.925  
7.801  
7.781  
7.761  
7.466  
7.445  
7.441  
7.191  
7.171

3.568  
3.178  
3.104  
3.069  
2.835  
2.800  
2.590  
1.737  
1.020  
0.849

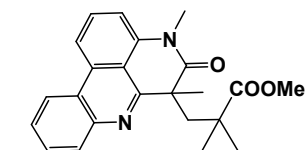

3a'd (<sup>1</sup>H NMR)

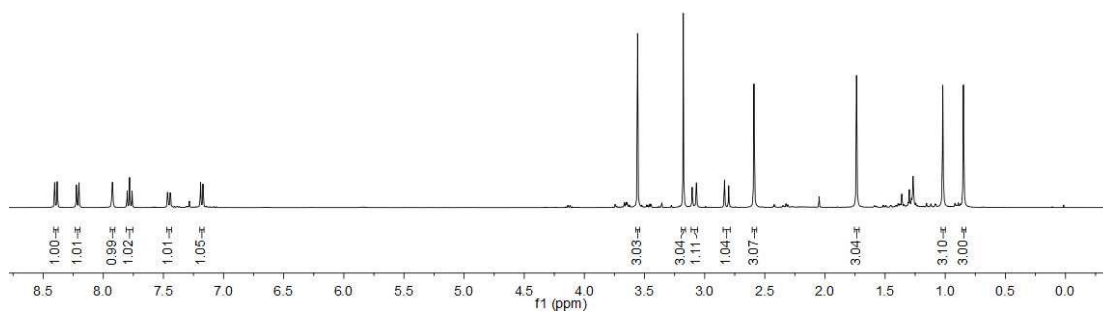

177.626  
173.667  
159.072  
144.689  
138.257  
136.675  
133.310  
130.124  
128.165  
126.384  
122.385  
120.445  
115.932  
111.984  
110.301  
51.512  
50.873  
49.595  
41.595  
33.257  
29.655  
27.019  
23.653  
21.558

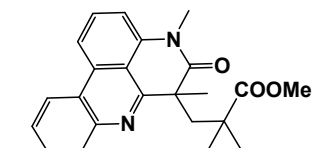

3a'd (<sup>13</sup>C NMR)

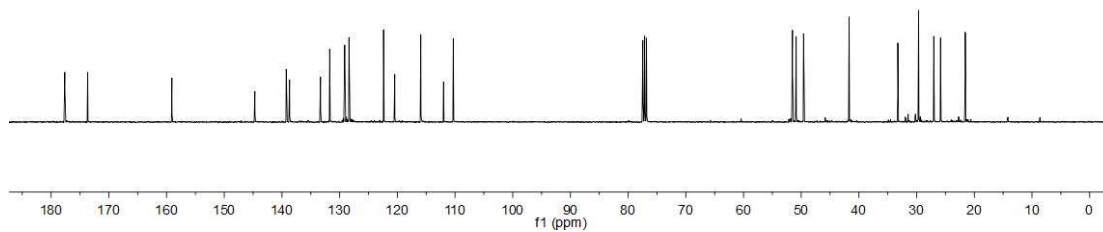

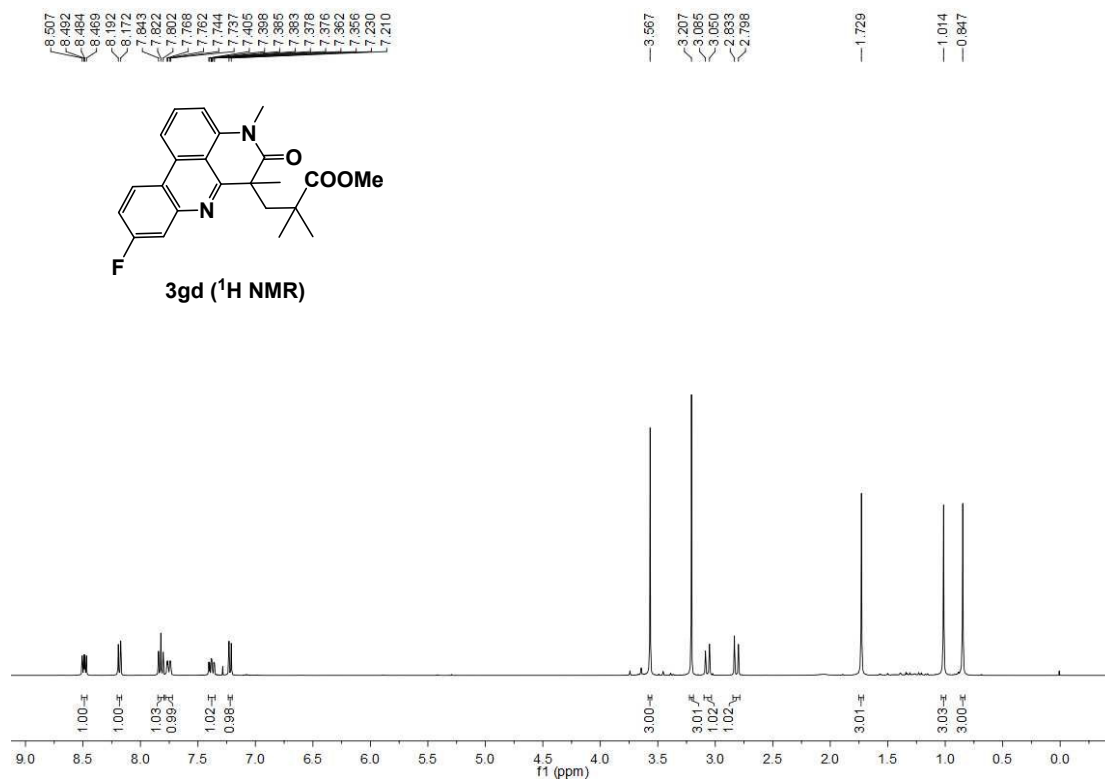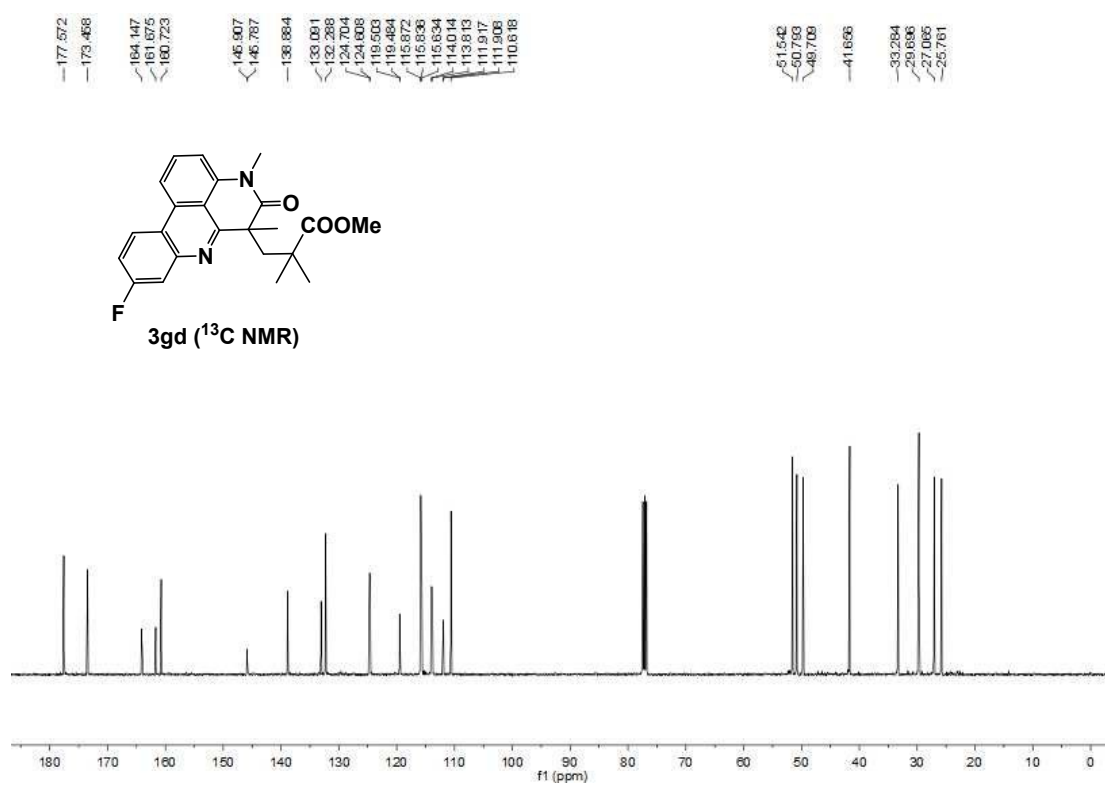

8.584, 8.575, 8.564, 8.564, 8.555, 8.339, 8.335, 8.319, 8.314, 8.182, 8.162, 8.130, 7.898, 7.890, 7.878, 7.870, 7.858, 7.850, 7.802, 7.785, 7.766, 7.707, 7.689, 7.679, 7.662, 7.506, 7.300, 7.285, 7.280, 3.644, 3.211, 3.176, 3.007, 2.900, 2.865, 2.761, 2.726, 2.651, 2.637, 2.624, 2.610, 2.597, 2.582, 2.569, 2.552, 2.538, 2.524, 2.510, 2.471, 2.471, 2.469, 2.448, 1.989, 1.986, 1.972, 1.964, 1.958, 1.953, 1.945, 1.936, 1.924, 1.891, 1.877, 1.862, 1.856, 1.849, 1.842, 1.754, 1.730, 1.325, 1.089

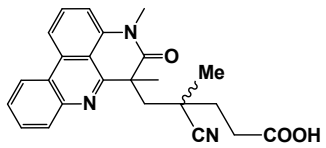

3ae (<sup>1</sup>H NMR)

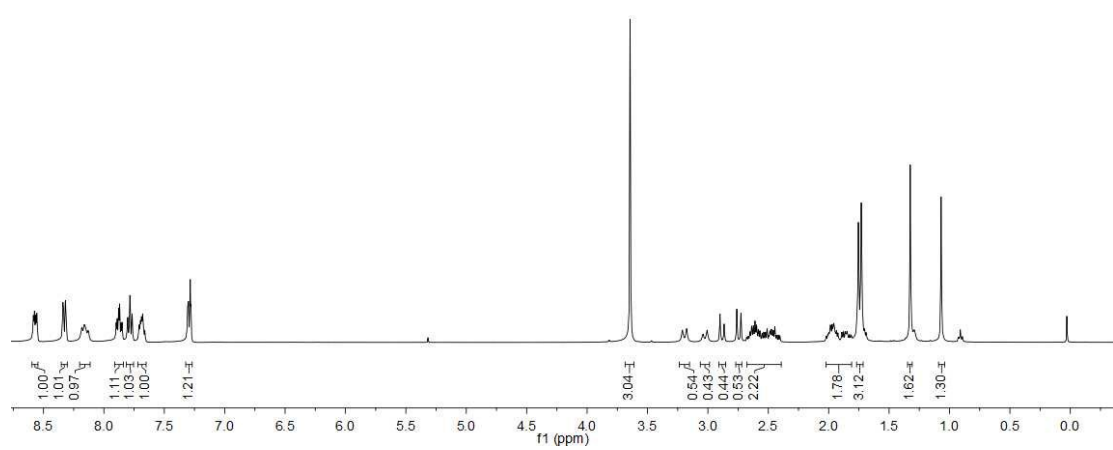

177.804, 177.751, 173.230, 173.076, 156.049, 157.779, 144.318, 136.088, 136.488, 133.560, 133.489, 132.246, 132.076, 129.528, 129.450, 129.393, 129.344, 126.982, 123.074, 122.761, 122.719, 122.594, 116.613, 116.418, 112.398, 112.329, 111.332, 111.183

50.105, 49.169, 46.355, 46.355, 36.016, 34.630, 34.432, 33.268, 33.164, 29.997, 29.677, 29.537, 26.687, 26.322

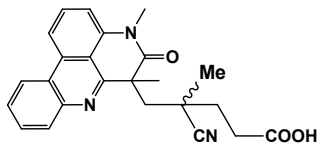

3ae (<sup>13</sup>C NMR)

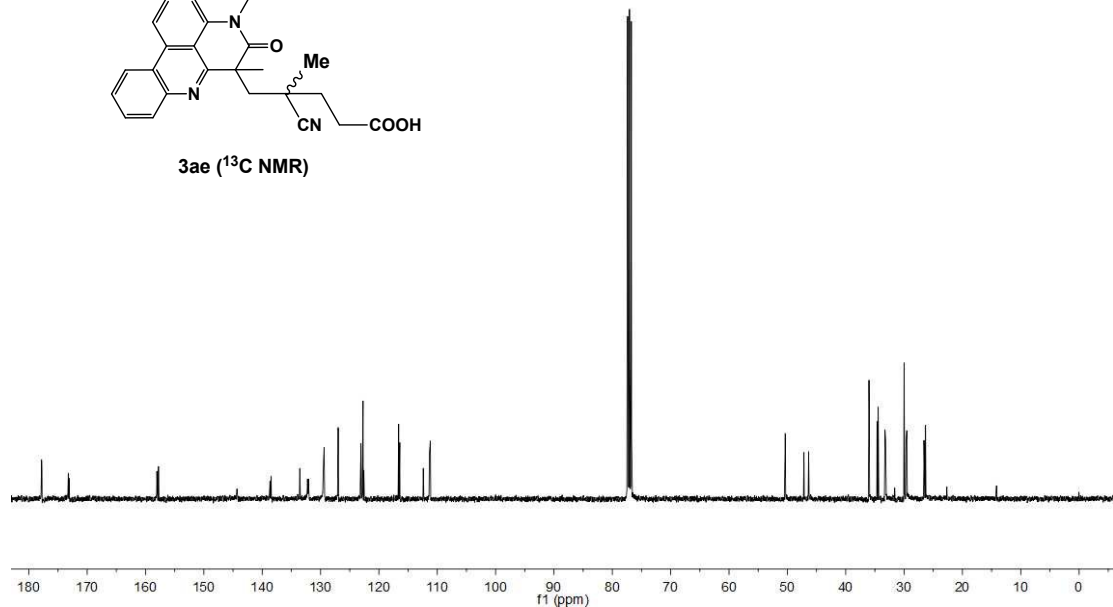

8.458, 8.448, 8.438, 8.427, 8.282, 8.262, 7.972, 7.938, 7.862, 7.853, 7.842, 7.654, 7.634, 7.612, 7.523, 7.514, 7.506, 7.487, 7.262, 7.253, 7.242, 7.233, 3.632, 3.185, 3.151, 3.015, 2.981, 2.893, 2.858, 2.754, 2.719, 2.683, 2.671, 2.641, 2.620, 2.611, 2.577, 2.564, 2.540, 2.520, 2.500, 2.512, 2.501, 2.488, 2.472, 2.460, 2.447, 2.432, 2.419, 1.984, 1.979, 1.966, 1.960, 1.945, 1.932, 1.920, 1.912, 1.872, 1.858, 1.852, 1.845, 1.824, 1.824, 1.747, 1.725, 1.695, 1.683, 1.309, 1.187

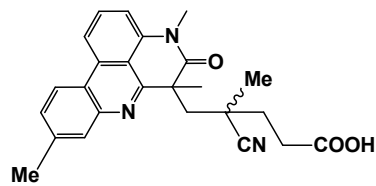

3a'e (<sup>1</sup>H NMR)

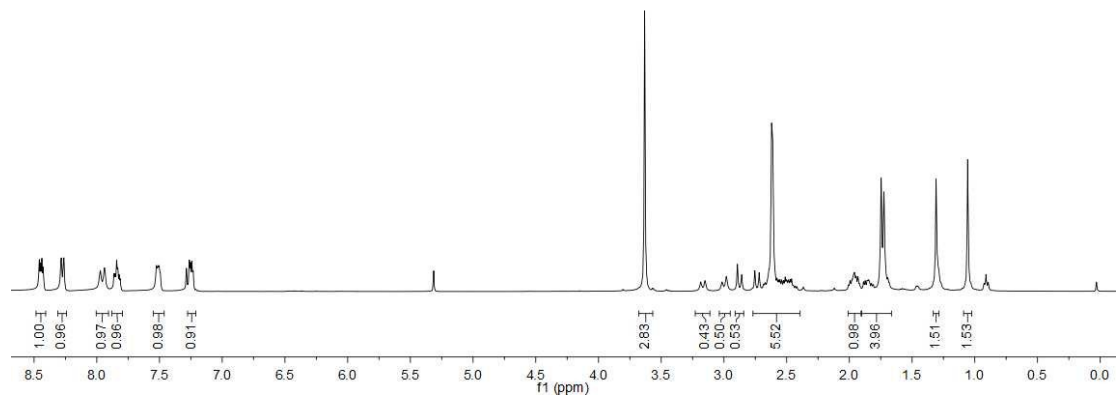

177.988, 177.780, 173.292, 173.114, 157.949, 157.636, 144.470, 138.643, 138.593, 138.386, 133.602, 133.529, 132.140, 131.962, 128.011, 128.910, 128.798, 122.707, 122.583, 122.543, 122.491, 120.755, 116.476, 116.272, 112.101, 112.044, 110.857, 110.700, 50.309, 50.253, 47.224, 46.470, 36.009, 35.947, 34.641, 34.441, 33.223, 33.129, 33.970, 29.696, 29.544, 26.549, 26.179, 21.608

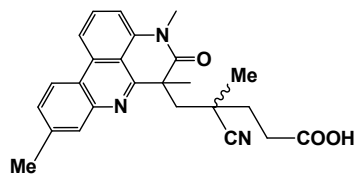

3a'e (<sup>13</sup>C NMR)

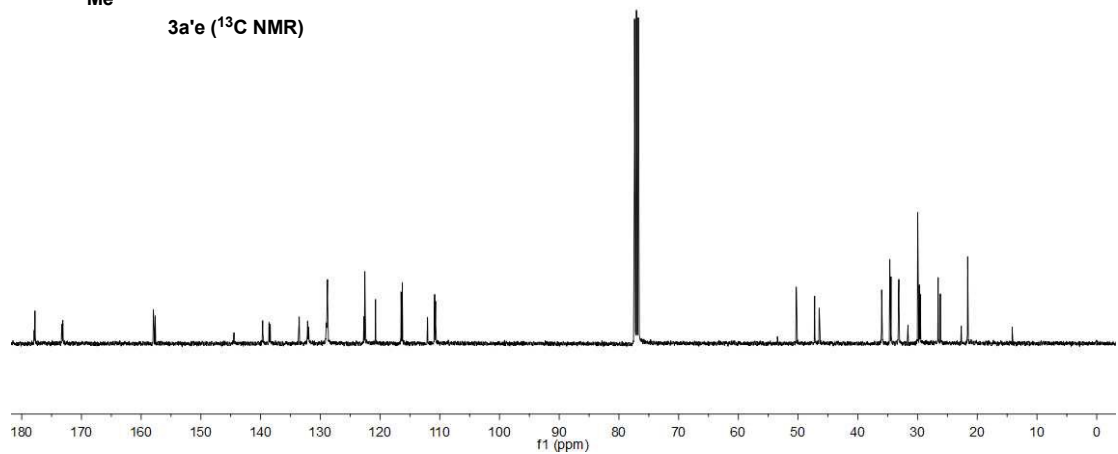

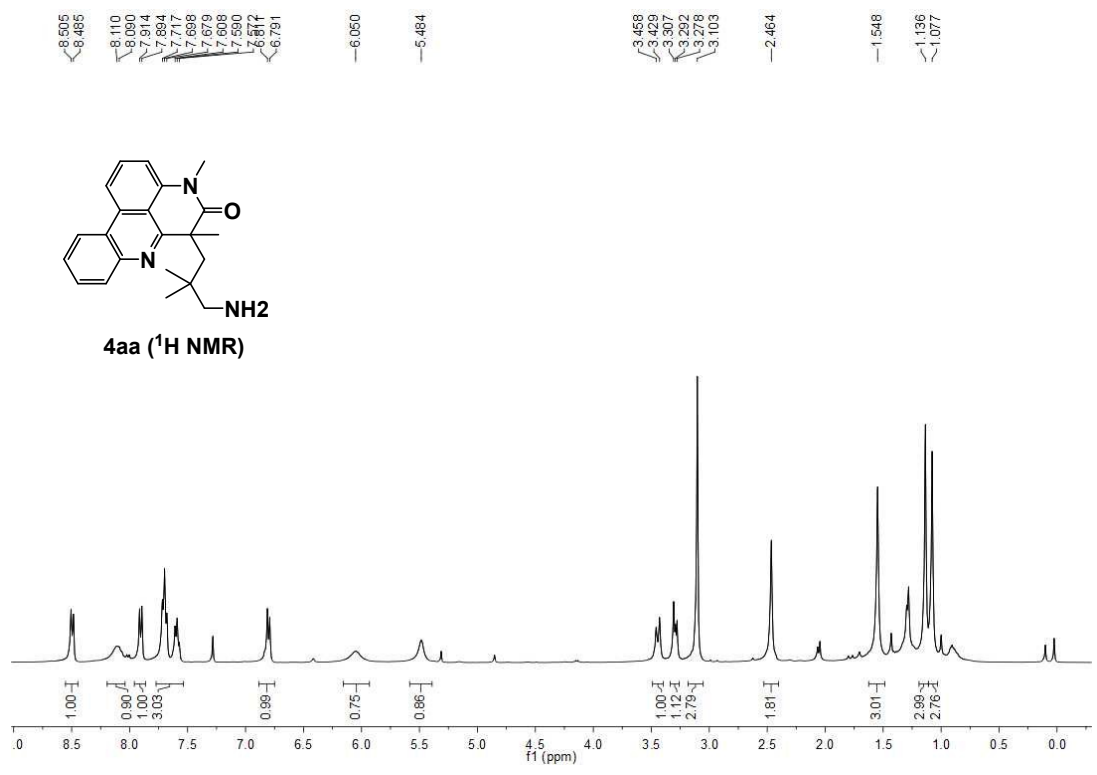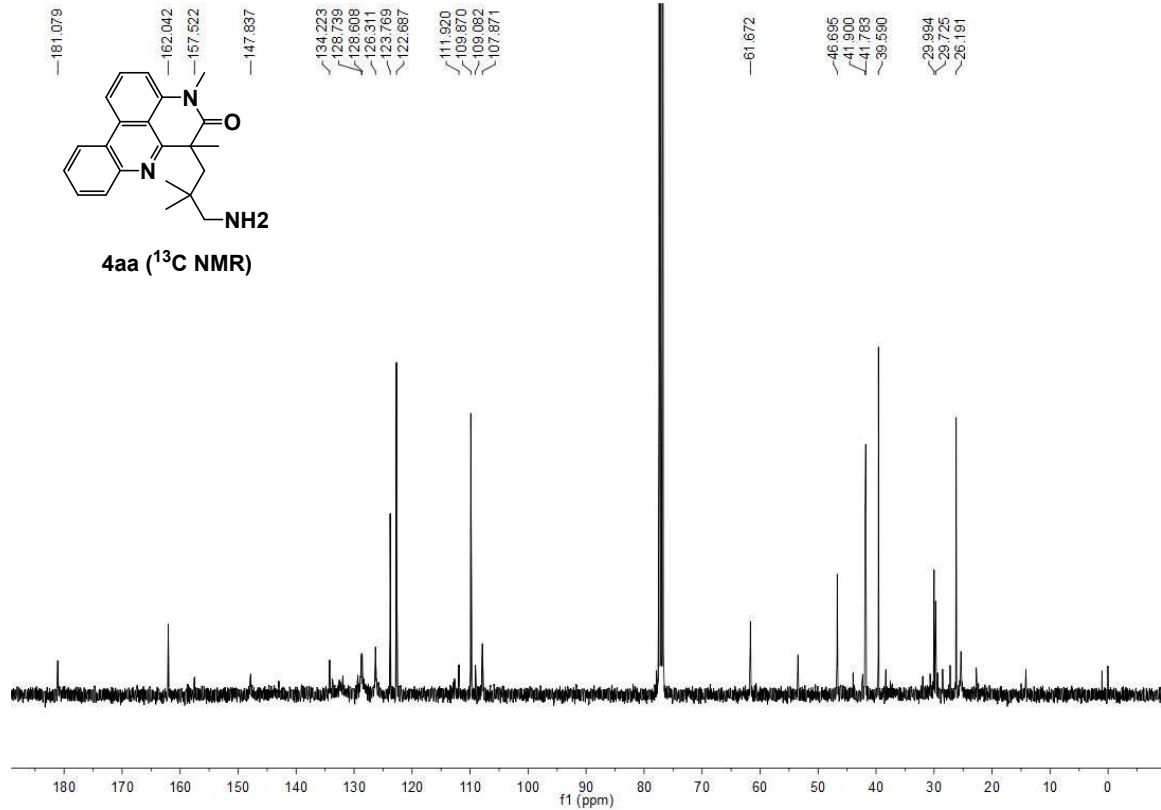

## 6. Crystal structure and data of 3za

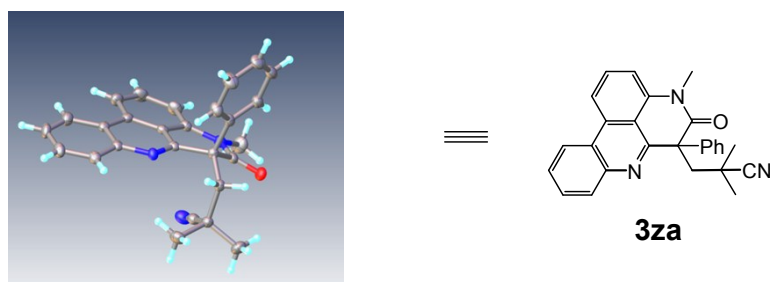

**Figure S1** Crystal structures of **3za** (CCDC: 1572151).

**Table S1** Crystal data and structure refinement for **3za**.

| Compound                                                               | <b>3za</b>                                       |
|------------------------------------------------------------------------|--------------------------------------------------|
| Formula                                                                | C <sub>27</sub> H <sub>23</sub> N <sub>3</sub> O |
| Crystal system                                                         | Tetragonal                                       |
| Formula weight                                                         | 405.48                                           |
| Space group                                                            | I4 <sub>1</sub> cd                               |
| a/Å                                                                    | 31.825(9)                                        |
| b/Å                                                                    | 31.825(9)                                        |
| c/Å                                                                    | 8.303(2)                                         |
| α/°                                                                    | 90                                               |
| β/°                                                                    | 90                                               |
| γ/°                                                                    | 90                                               |
| V/Å <sup>3</sup>                                                       | 8409.0(5)                                        |
| Z                                                                      | 16                                               |
| D <sub>c</sub> /g cm <sup>-3</sup>                                     | 1.281                                            |
| μ/mm <sup>-1</sup>                                                     | 0.08                                             |
| F(000)                                                                 | 3424                                             |
| Observed reflection/unique                                             | 22708 / 3034                                     |
| R <sub>int</sub>                                                       | 0.049                                            |
| Goodness-of-fit on F <sup>2</sup>                                      | 1.126                                            |
| R <sub>1</sub> <sup>a</sup> , wR <sub>2</sub> <sup>b</sup> [I > 2σ(I)] | 0.0329,0.0924                                    |
| R <sub>1</sub> , wR <sub>2</sub> (all data)                            | 0.0381,0.0969                                    |

**Table S2** Bond lengths (Å) and angles (°) for compound **3za**.

|         |          |         |          |
|---------|----------|---------|----------|
| C1—C2   | 1.412(3) | C14—O1  | 1.222(3) |
| C1—C6   | 1.408(4) | C15—C16 | 1.524(3) |
| C1—N2   | 1.392(3) | C15—C17 | 1.558(4) |
| C15—C23 | 1.535(4) | C17—C18 | 1.388(4) |
| C2—C3   | 1.371(4) | C16—N2  | 1.304(3) |
| C3—C4   | 1.390(4) | C17—C22 | 1.388(4) |
| C4—C5   | 1.369(4) | C18—C19 | 1.389(4) |
| C5—C6   | 1.411(4) | C19—C20 | 1.372(4) |



|             |            |             |            |
|-------------|------------|-------------|------------|
| C6—C7       | 1.448(4)   | C21—C22     | 1.382(4)   |
| C7—C8       | 1.406(4)   | C20—C21     | 1.390(4)   |
| C7—C12      | 1.411(4)   | C23—C24     | 1.571(4)   |
| C8—C9       | 1.371(4)   | C9—C10      | 1.393(4)   |
| C10—C11     | 1.378(4)   | C24—C25     | 1.531(4)   |
| C11—C12     | 1.418(3)   | C24—C26     | 1.542(4)   |
| C11—N1      | 1.415(4)   | C24—C27     | 1.482(4)   |
| C12—C16     | 1.426(4)   | C27—N3      | 1.147(4)   |
| C13—N1      | 1.470(3)   | C12—C16—C15 | 118.3(2)   |
| C14—C15     | 1.532(3)   | N2—C16—C12  | 124.1(2)   |
| C14—N1      | 1.363(3)   | N2—C16—C15  | 117.6(2)   |
| C6—C1—C2    | 120.1(2)   | C18—C17—C15 | 122.5(2)   |
| N2—C1—C2    | 117.0(2)   | C22—C17—C15 | 119.2(2)   |
| N2—C1—C6    | 122.9(2)   | C22—C17—C18 | 118.3(3)   |
| C3—C2—C1    | 119.9(3)   | C17—C18—C19 | 120.8(2)   |
| C5—C4—C3    | 120.8(3)   | C2—C3—C4    | 120.3(2)   |
| C4—C5—C6    | 120.7(3)   | C20—C19—C18 | 120.4(3)   |
| C1—C6—C5    | 118.1(2)   | C19—C20—C21 | 119.4(3)   |
| C1—C6—C7    | 118.2(2)   | C15—C23—C24 | 117.8(2)   |
| C5—C6—C7    | 123.6(2)   | C22—C21—C20 | 120.2(3)   |
| C8—C7—C6    | 123.6(2)   | C21—C22—C17 | 120.9(3)   |
| C8—C7—C12   | 119.1(2)   | C7—C12—C11  | 120.0(2)   |
| C12—C7—C6   | 117.2(2)   | C7—C12—C16  | 119.1(2)   |
| C9—C8—C7    | 119.7(3)   | C11—C12—C16 | 120.9(2)   |
| C11—C10—C9  | 120.4(2)   | N1—C14—C15  | 118.4(2)   |
| C8—C9—C10   | 121.5(3)   | C25—C24—C23 | 110.4(2)   |
| C10—C11—C12 | 119.2(2)   | C25—C24—C26 | 109.7(3)   |
| C10—C11—N1  | 121.4(2)   | C26—C24—C23 | 110.9(2)   |
| N1—C11—C12  | 119.4(2)   | C27—C24—C23 | 111.3(2)   |
| O1—C14—C15  | 119.5(2)   | C27—C24—C25 | 107.1(2)   |
| O1—C14—N1   | 121.9(2)   | C27—C24—C26 | 107.3(2)   |
| C14—C15—C17 | 106.6(2)   | C23—C15—C17 | 108.96(19) |
| C14—C15—C23 | 109.0(2)   | N3—C27—C24  | 178.6(3)   |
| C16—C15—C14 | 112.86(19) | C11—N1—C13  | 118.2(2)   |
| C16—C15—C17 | 107.8(2)   | C14—N1—C11  | 123.57(19) |
| C16—C15—C23 | 111.4(2)   | C14—N1—C13  | 117.6(2)   |
| C16—N2—C1   | 118.0(2)   |             |            |
